# Supplementary material for: A general route to monoorganopnicogen(iii) (M = Sb, Bi) compounds with a pincer (N,C,N) group and oxo ligands
Source: Royal Society of Chemistry journal article supplement (doi:10.1039/c5dt00603a), 2015-01-01
Supplement: c5dt00603a1.pdf [file c5dt00603a1.pdf]

## Electronic Supplementary Information

### **A general route to monoorganopnicogen(III) (M = Sb, Bi) compounds with a pincer (N,C,N) group and oxo ligands**

**Gabriela Strîmb, Alpár Pöllnitz,\* Ciprian I. Raț\* and Cristian Silvestru\***

Departamentul de Chimie, Centrul de Chimie Supramoleculară Organică și Organometalică (CCSOOM), Facultatea de Chimie și Inginerie Chimică, Universitatea Babeș-Bolyai, 400028 Cluj-Napoca, Romania.

Fax: (+40) 264-590818, Tel: (+40) 264-593833; E-mail: cristian.silvestru@ubbcluj.ro

## Content

|                                                                                                                                                                                                                                                                                           |     |
|-------------------------------------------------------------------------------------------------------------------------------------------------------------------------------------------------------------------------------------------------------------------------------------------|-----|
| Numbering scheme for NMR assignments                                                                                                                                                                                                                                                      | S1  |
| [2,6-{MeN(CH <sub>2</sub> CH <sub>2</sub> ) <sub>2</sub> NCH <sub>2</sub> } <sub>2</sub> C <sub>6</sub> H <sub>3</sub> ]SbCl <sub>2</sub> ( <b>1</b> )                                                                                                                                    | S3  |
| [2,6-{MeN(CH <sub>2</sub> CH <sub>2</sub> ) <sub>2</sub> NCH <sub>2</sub> } <sub>2</sub> C <sub>6</sub> H <sub>3</sub> ] <sub>2</sub> Sb <sub>2</sub> O <sub>2</sub> ( <b>3</b> )                                                                                                         | S6  |
| [2,6-{MeN(CH <sub>2</sub> CH <sub>2</sub> ) <sub>2</sub> NCH <sub>2</sub> } <sub>2</sub> C <sub>6</sub> H <sub>3</sub> ] <sub>2</sub> Bi <sub>2</sub> O <sub>2</sub> ( <b>4</b> )                                                                                                         | S8  |
| [{2-(MeN(H){CH <sub>2</sub> CH <sub>2</sub> } <sub>2</sub> NCH <sub>2</sub> )-<br>6-(MeN{CH <sub>2</sub> CH <sub>2</sub> } <sub>2</sub> NCH <sub>2</sub> )C <sub>6</sub> H <sub>3</sub> ] <sub>2</sub> Sb <sub>2</sub> O(OH)](O <sub>2</sub> CCF <sub>3</sub> ) <sub>3</sub> ( <b>5</b> ) | S10 |
| “[2,6-{MeN(CH <sub>2</sub> CH <sub>2</sub> ) <sub>2</sub> NCH <sub>2</sub> } <sub>2</sub> C <sub>6</sub> H <sub>3</sub> ]SbCO <sub>3</sub> ” ( <b>6</b> )                                                                                                                                 | S13 |
| “[2,6-{MeN(CH <sub>2</sub> CH <sub>2</sub> ) <sub>2</sub> NCH <sub>2</sub> } <sub>2</sub> C <sub>6</sub> H <sub>3</sub> ]BiCO <sub>3</sub> ” ( <b>7</b> )                                                                                                                                 | S16 |
| [2,6-{MeN(CH <sub>2</sub> CH <sub>2</sub> ) <sub>2</sub> NCH <sub>2</sub> } <sub>2</sub> C <sub>6</sub> H <sub>3</sub> ]Sb[O(O)CC(O)O] ( <b>8</b> )                                                                                                                                       | S18 |
| [(2,6-{MeN(CH <sub>2</sub> CH <sub>2</sub> ) <sub>2</sub> NCH <sub>2</sub> } <sub>2</sub> C <sub>6</sub> H <sub>3</sub> ]Sb[O <sub>2</sub> -1,2-C <sub>6</sub> H <sub>3</sub> -3-(CH <sub>2</sub> ) <sub>2</sub> NH <sub>3</sub> ]Cl ( <b>9</b> )                                         | S20 |
| [2,6-{MeN(CH <sub>2</sub> CH <sub>2</sub> ) <sub>2</sub> NCH <sub>2</sub> } <sub>2</sub> C <sub>6</sub> H <sub>3</sub> ]Sb(OCH <sub>2</sub> ) <sub>2</sub> ( <b>10</b> )                                                                                                                  | S21 |
| [2,6-{MeN(CH <sub>2</sub> CH <sub>2</sub> ) <sub>2</sub> NCH <sub>2</sub> } <sub>2</sub> C <sub>6</sub> H <sub>3</sub> ]Bi(OCH <sub>2</sub> ) <sub>2</sub> ( <b>11</b> )                                                                                                                  | S24 |
| [2,6-{MeN(CH <sub>2</sub> CH <sub>2</sub> ) <sub>2</sub> NCH <sub>2</sub> } <sub>2</sub> C <sub>6</sub> H <sub>3</sub> ]Sb(OCMe <sub>2</sub> ) <sub>2</sub> ( <b>12</b> )                                                                                                                 | S26 |
| 2,6-{MeN(CH <sub>2</sub> CH <sub>2</sub> ) <sub>2</sub> NCH <sub>2</sub> } <sub>2</sub> C <sub>6</sub> H <sub>3</sub> ]Bi(OCMe <sub>2</sub> ) <sub>2</sub> ( <b>13</b> )                                                                                                                  | S28 |
| [2,6-{MeN(CH <sub>2</sub> CH <sub>2</sub> ) <sub>2</sub> NCH <sub>2</sub> } <sub>2</sub> C <sub>6</sub> H <sub>3</sub> ]Sb(O <sub>2</sub> -1,2-C <sub>6</sub> H <sub>4</sub> ) ( <b>14</b> )                                                                                              | S30 |
| [2,6-{MeN(CH <sub>2</sub> CH <sub>2</sub> ) <sub>2</sub> NCH <sub>2</sub> } <sub>2</sub> C <sub>6</sub> H <sub>3</sub> ]Bi(O <sub>2</sub> -1,2-C <sub>6</sub> H <sub>4</sub> ) ( <b>15</b> )                                                                                              | S32 |
| Crystallographic data                                                                                                                                                                                                                                                                     | S34 |
| Theoretically calculated structures                                                                                                                                                                                                                                                       | S36 |
| Cartesian coordinates of the calculated structures                                                                                                                                                                                                                                        | S50 |



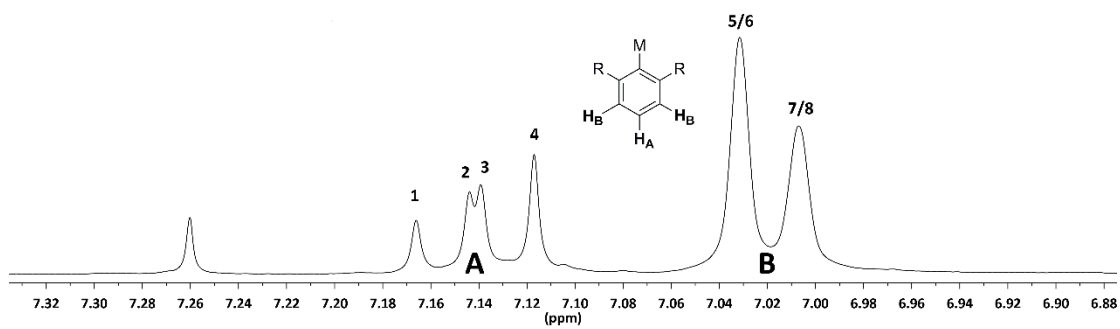

**Figure S1.** Assignment in  $\text{AB}_2$  spin systems (example from  $^1\text{H}$  NMR spectrum of **10** in  $\text{CDCl}_3$  at  $60^\circ\text{C}$ ,  $301\text{ MHz}$ ).

**[2,6-{MeN(CH<sub>2</sub>CH<sub>2</sub>)<sub>2</sub>NCH<sub>2</sub>}<sub>2</sub>C<sub>6</sub>H<sub>3</sub>]SbCl<sub>2</sub> (1)**

<sup>1</sup>H NMR (301 MHz, CDCl<sub>3</sub>, 213 K): δ 2.33 (s, 6H, H-8), 2.55 (dd, <sup>2</sup>J<sub>H-7a,H-7e</sub> ≈ <sup>3</sup>J<sub>H-6a,H-7a</sub> = 12.1 Hz, 4H, H-7a), 2.73 (dd, <sup>2</sup>J<sub>H-6a,H-6e</sub> ≈ <sup>3</sup>J<sub>H-6a,H-7a</sub> = 11.9 Hz, 4H, H-6a), 2.91 (d, <sup>2</sup>J<sub>H-7a,H-7e</sub> = 12.2 Hz, 4H, H-7e), 3.72 (d, <sup>2</sup>J<sub>H-6a,H-6e</sub> = 11.6 Hz, 4H, H-6e), 4.14 (s, 2H, H-5), AB<sub>2</sub> spin system with B at δ 7.19 ppm (d, <sup>3</sup>J<sub>H-3,H-4</sub> = 7.6 Hz, 2H, H-3) and A at δ 7.32 ppm (t, <sup>3</sup>J<sub>H-3,H-4</sub> = 7.5 Hz, 1H, H-4).

<sup>13</sup>C{<sup>1</sup>H} NMR (76 MHz, CDCl<sub>3</sub>, 213 K): δ 45.58 (C-8), 54.33 (C-6), 55.14 (C-7), 64.60 (C-5), 125.52 (C-3), 130.46 (C-4), 141.33 (C-2), 150.83 (C-1).

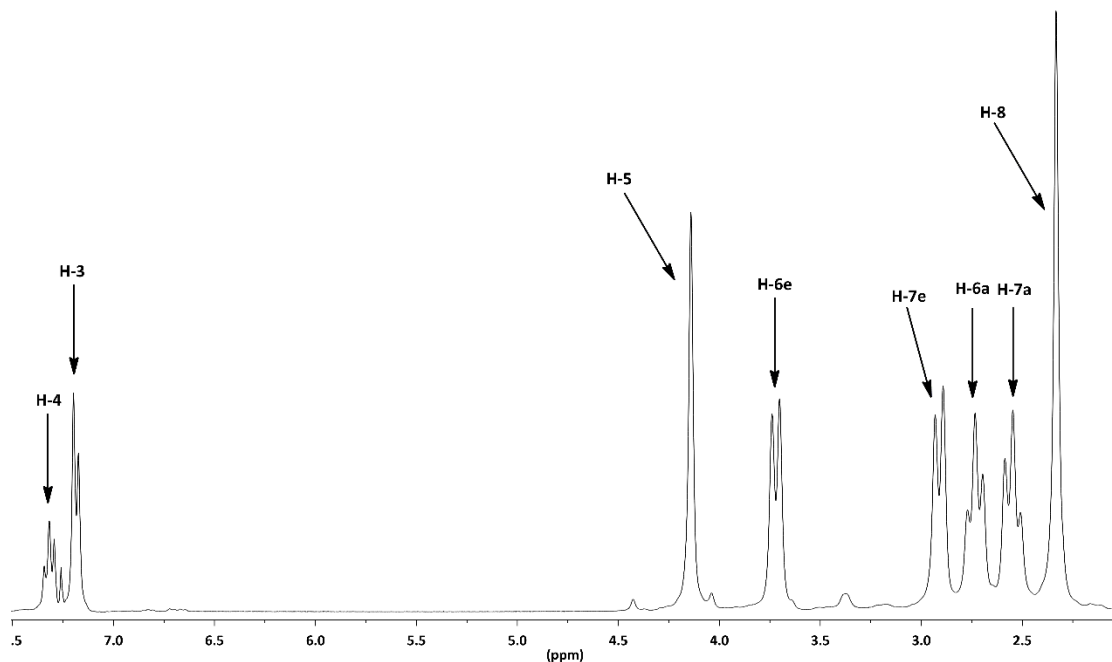

**Figure S2.** <sup>1</sup>H NMR (301 MHz, CDCl<sub>3</sub>) spectrum of compound **1**, at -60 °C.

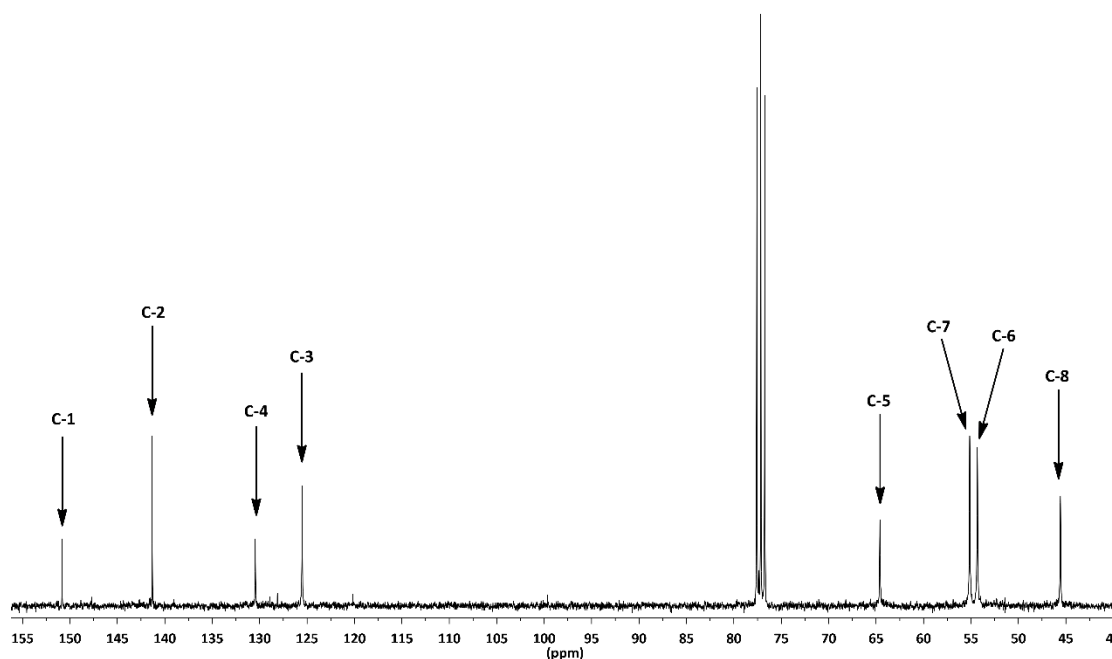

**Figure S3.** <sup>13</sup>C NMR (76 MHz, CDCl<sub>3</sub>) spectrum of compound **1**, at -60 °C.

- the crystal contains a 1:1 mixture of (*pS*<sub>N1</sub>,*pS*<sub>N3</sub>)- and (*pR*<sub>N1</sub>,*pR*<sub>N3</sub>)-**1a** and (*pS*<sub>N5</sub>,*pS*<sub>N7</sub>)- and (*pR*<sub>N5</sub>,*pR*<sub>N7</sub>)-**1b** isomers

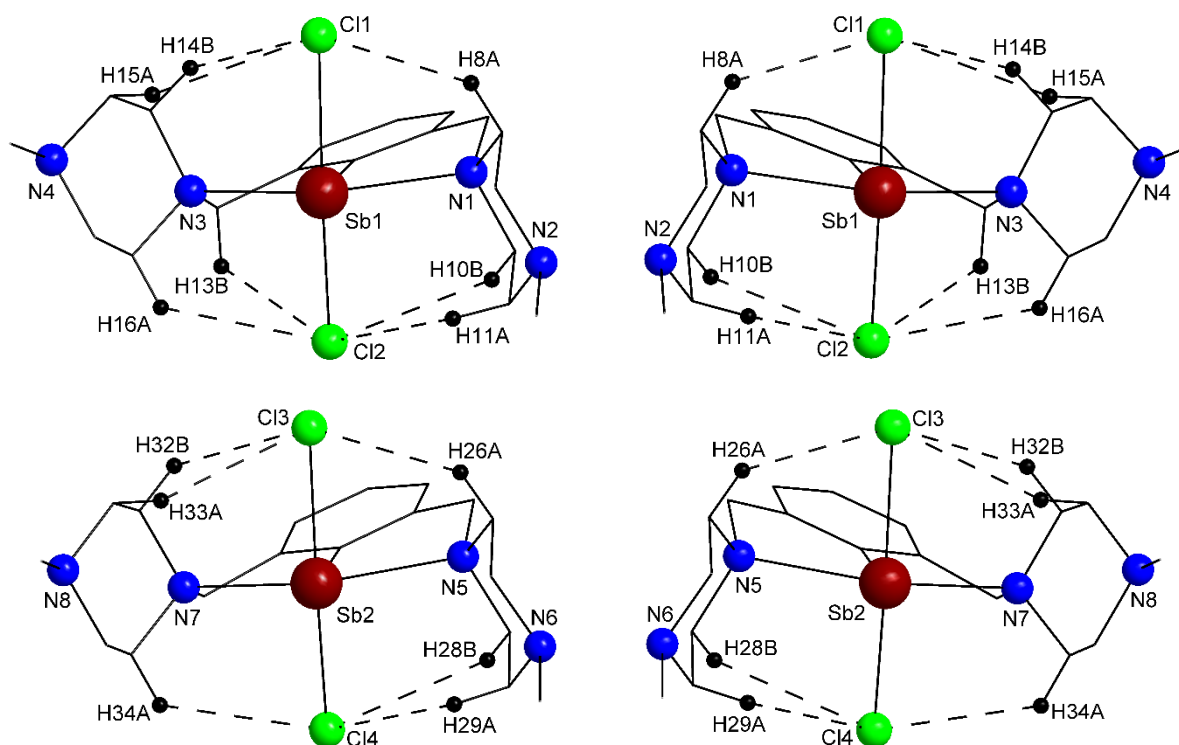

**Figure S4.** Molecular structure of isomers (*pS*<sub>N1</sub>,*pS*<sub>N3</sub>)-**1a** (left, up), (*pR*<sub>N1</sub>,*pR*<sub>N3</sub>)-**1a** (right, up), (*pS*<sub>N5</sub>,*pS*<sub>N7</sub>)-**1b** (left, down) and (*pR*<sub>N5</sub>,*pR*<sub>N7</sub>)-**1b** (right, down) in the crystal of **1**, showing the intramolecular Cl...H contacts (only hydrogen atoms involved in intramolecular contacts are shown).

|                           |                                     |        |                                                   |
|---------------------------|-------------------------------------|--------|---------------------------------------------------|
| - intramolecular distance | Cl(1)···H(8A) <sub>methylene</sub>  | 2.78 Å | $\sum r_{\text{vdW}}(\text{Cl}, \text{H})$ 3.01 Å |
|                           | Cl(1)···H(14B) <sub>methylene</sub> | 2.88 Å |                                                   |
|                           | Cl(1)···H(15A) <sub>methylene</sub> | 2.92 Å |                                                   |
|                           | Cl(2)···H(10B) <sub>methylene</sub> | 2.85 Å |                                                   |
|                           | Cl(2)···H(11A) <sub>methylene</sub> | 2.94 Å |                                                   |
|                           | Cl(2)···H(13B) <sub>methylene</sub> | 2.91 Å |                                                   |
|                           | Cl(2)···H(16A) <sub>methylene</sub> | 2.83 Å |                                                   |
|                           | Cl(3)···H(26A) <sub>methylene</sub> | 2.78 Å |                                                   |
|                           | Cl(3)···H(32B) <sub>methylene</sub> | 2.81 Å |                                                   |
|                           | Cl(3)···H(33A) <sub>methylene</sub> | 2.82 Å |                                                   |
|                           | Cl(4)···H(28B) <sub>methylene</sub> | 2.91 Å |                                                   |
|                           | Cl(4)···H(29A) <sub>methylene</sub> | 2.89 Å |                                                   |
|                           | Cl(4)···H(34A) <sub>methylene</sub> | 2.81 Å |                                                   |

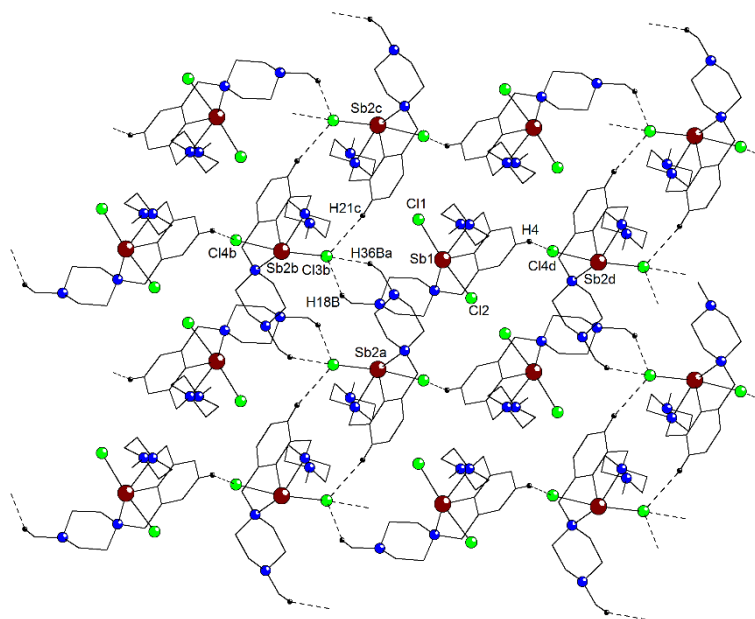

**Figure S5.** View along *a* axis of a layer based on Cl $\cdots$ H contacts in the crystal of **1** (only hydrogen atoms involved in intermolecular contacts are shown) [symmetry equivalent atoms ( $-I+x, y, z$ ), ( $I-x, I-y, I-z$ ), ( $-I+x, I+y, z$ ) and ( $I-x, I-y, -z$ ) are given by “a”, “b”, “c” and “d”, respectively].

|                           |                                           |        |                                                   |
|---------------------------|-------------------------------------------|--------|---------------------------------------------------|
| - intermolecular distance | Cl(3b) $\cdots$ H(21c) <sub>aryl</sub>    | 2.95 Å | $\sum r_{\text{vdw}}(\text{Cl}, \text{H})$ 3.01 Å |
|                           | Cl(3b) $\cdots$ H(18B) <sub>methyl</sub>  | 2.90 Å |                                                   |
|                           | Cl(3b) $\cdots$ H(36Ba) <sub>methyl</sub> | 2.87 Å |                                                   |
|                           | Cl(4d) $\cdots$ H(4) <sub>aryl</sub>      | 2.92 Å |                                                   |

- no further contacts between parallel layers in the crystal of **1**.

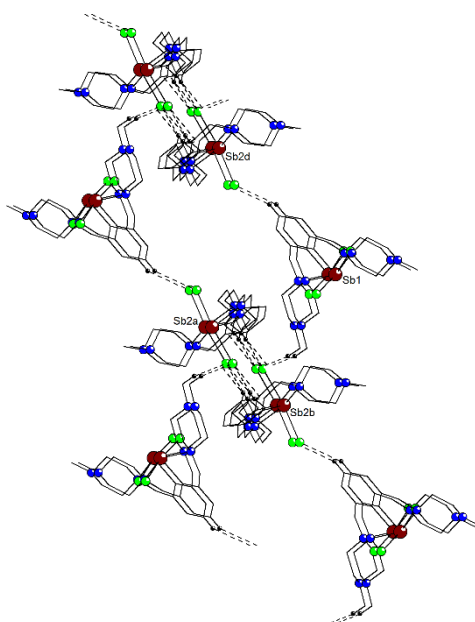

**Figure S6.** View along *b* axis of a layer based on Cl $\cdots$ H contacts in the crystal of **1** (only hydrogen atoms involved in intermolecular contacts are shown).

[2,6-{MeN(CH<sub>2</sub>CH<sub>2</sub>)<sub>2</sub>NCH<sub>2</sub>}<sub>2</sub>C<sub>6</sub>H<sub>3</sub>]<sub>2</sub>Sb<sub>2</sub>O<sub>2</sub> (**3**)

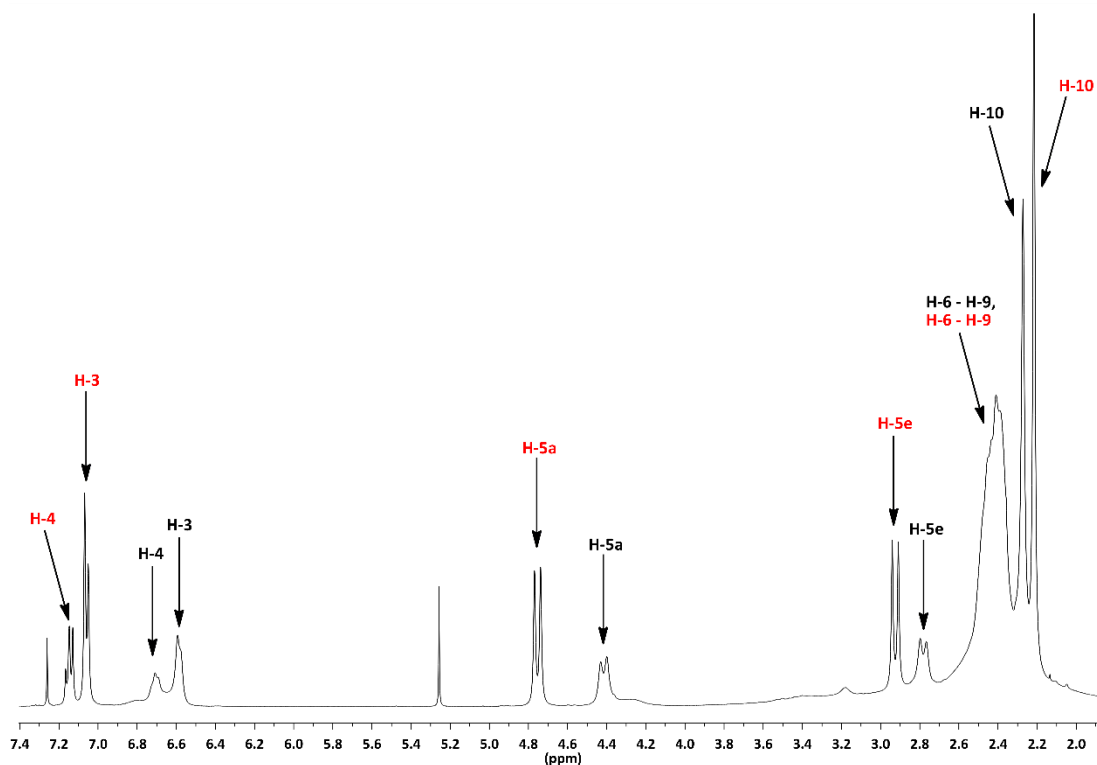

**Figure S7.** <sup>1</sup>H NMR (400 MHz, CDCl<sub>3</sub>) spectrum of compound **3**, at r.t. (isomer **3a** – black; isomer **3b** – red).

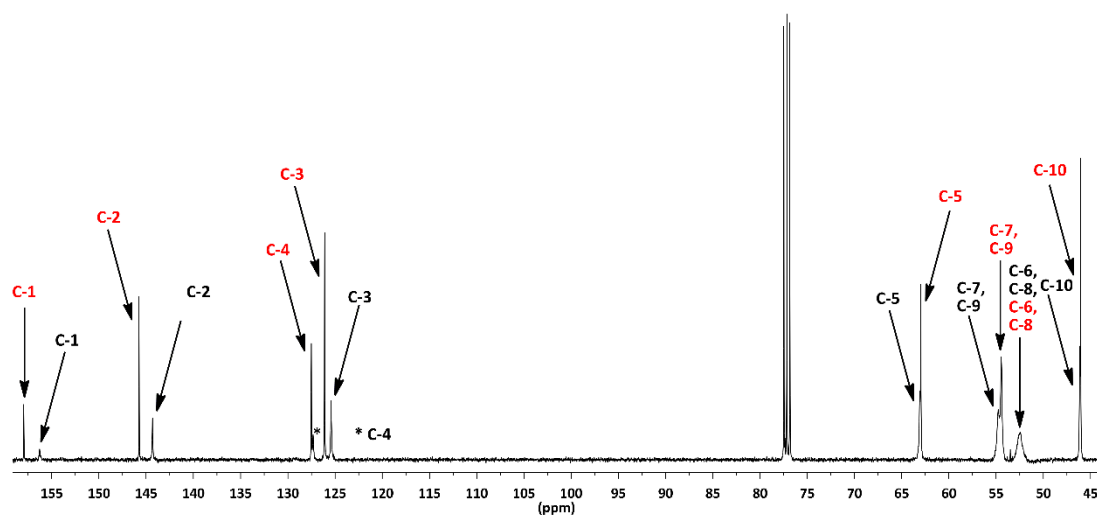

**Figure S8.** <sup>13</sup>C NMR (101 MHz, CDCl<sub>3</sub>) spectrum of compound **3**, at r.t. (isomer **3a** – black; isomer **3b** – red).



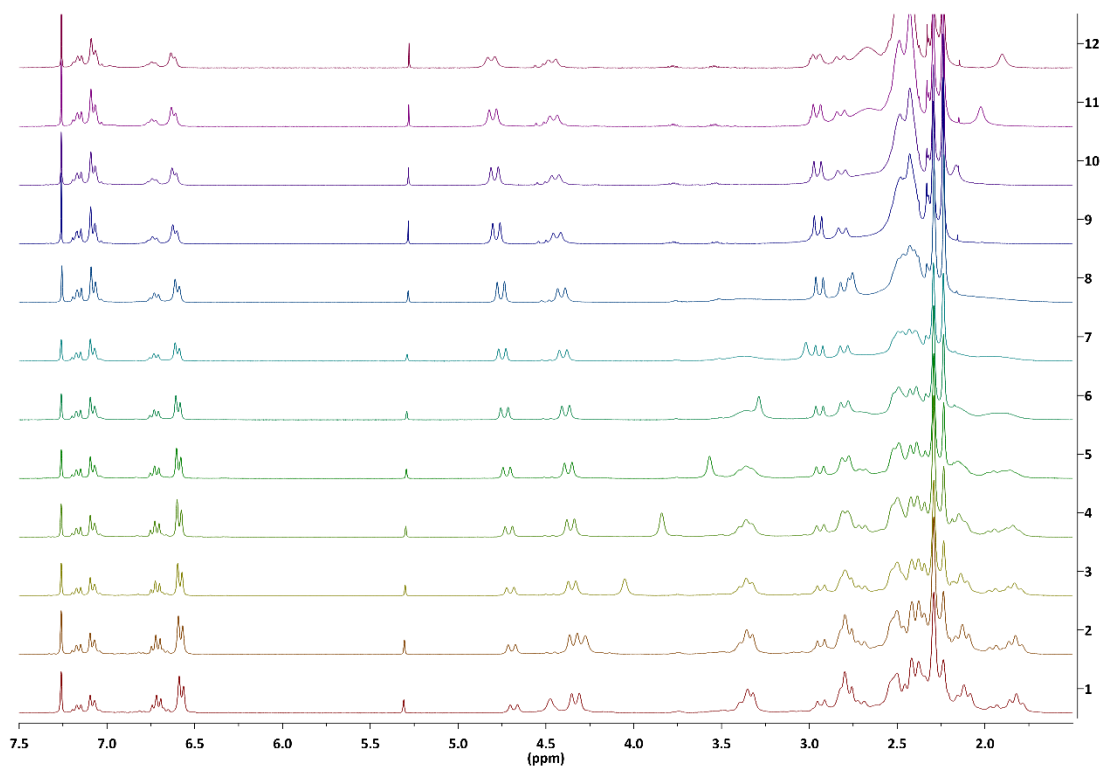

**Figure S9.**  $^1\text{H}$  NMR (301 MHz,  $\text{CDCl}_3$ ) spectra of compound **3** at temperatures ranging from  $-60$   $^\circ\text{C}$  (down) to  $60$   $^\circ\text{C}$  (up); increments of  $10$   $^\circ\text{C}$ .

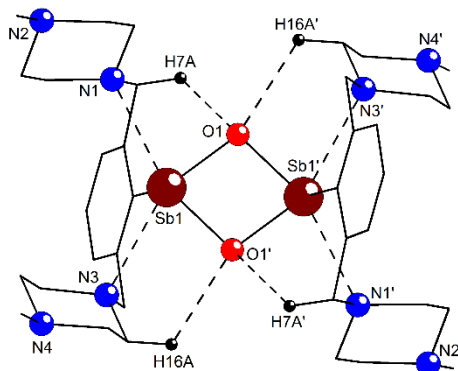

**Figure S10.** Molecular structure of **3**, showing the intramolecular  $\text{O}\cdots\text{H}$  contacts (only hydrogen atoms involved in intramolecular contacts are shown) [symmetry equivalent atoms ( $1-x$ ,  $1-y$ ,  $2-z$ ) are given by “prime”].

- intramolecular distance
 

|                                                             |                    |                                                           |
|-------------------------------------------------------------|--------------------|-----------------------------------------------------------|
| $\text{O}(1)\cdots\text{H}(7\text{A})_{\text{methylene}}$   | $2.55 \text{ \AA}$ | $\sum r_{\text{vdw}}(\text{O},\text{H}) 2.60 \text{ \AA}$ |
| $\text{O}(1)\cdots\text{H}(16\text{A}')_{\text{methylene}}$ | $2.59 \text{ \AA}$ |                                                           |
- no further contacts between molecules in the crystal of **3**.

[2,6-{MeN(CH<sub>2</sub>CH<sub>2</sub>)<sub>2</sub>NCH<sub>2</sub>}<sub>2</sub>C<sub>6</sub>H<sub>3</sub>]<sub>2</sub>Bi<sub>2</sub>O<sub>2</sub> (**4**)

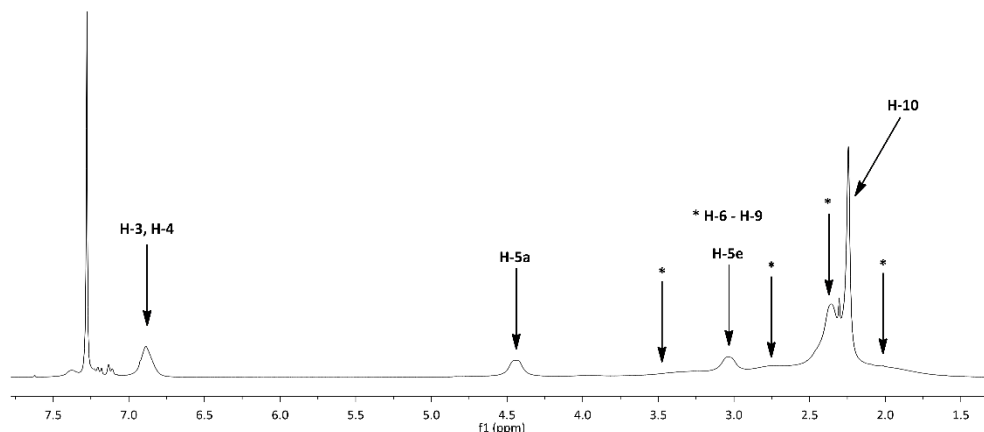

**Figure S11.** <sup>1</sup>H NMR (301 MHz, CDCl<sub>3</sub>) spectrum of compound **4**, at r.t.

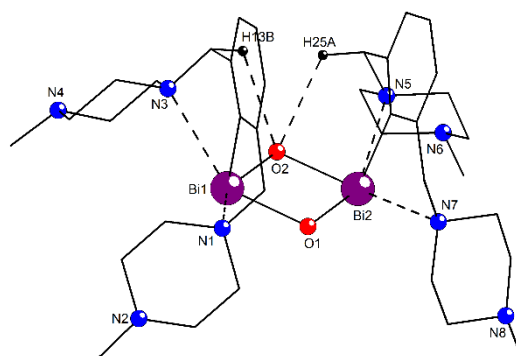

**Figure S12.** Molecular structure of **4**, showing the intramolecular O···H contacts (only hydrogen atoms involved in intramolecular contacts are shown).

|                           |                                    |        |                            |
|---------------------------|------------------------------------|--------|----------------------------|
| - intramolecular distance | O(2)···H(13B) <sub>methylene</sub> | 2.59 Å | $\sum r_{vdW}(O,H)$ 2.60 Å |
|                           | O(2)···H(25A) <sub>methylene</sub> | 2.54 Å |                            |

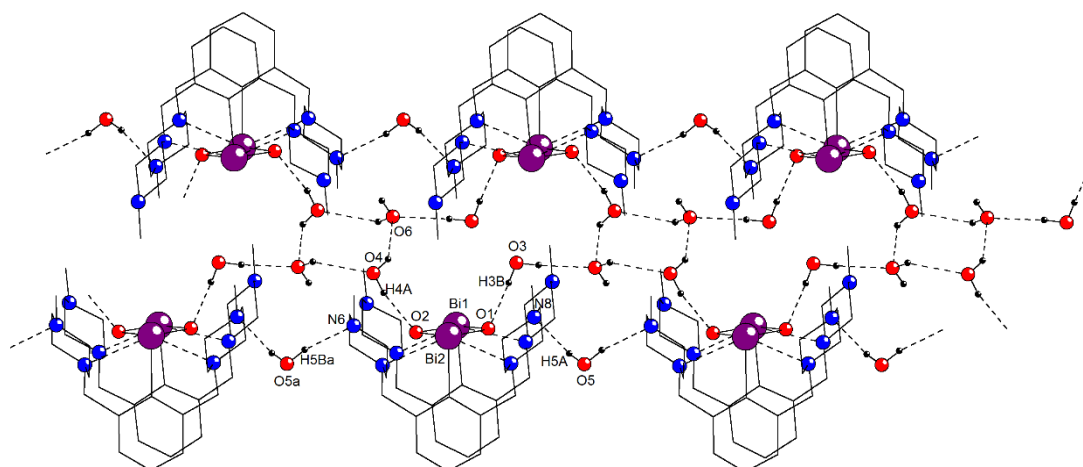

**Figure S13.** View of a chain polymer of dinuclear units of **4** and water molecules based on N···H and O···H hydrogen bonds in the crystal of **4**·4H<sub>2</sub>O (only hydrogen atoms of water molecules are shown) [symmetry equivalent atoms ( $-I+x, y, z$ ) are given by “a”].

|                           |                                |        |                            |
|---------------------------|--------------------------------|--------|----------------------------|
| - intermolecular distance | N(6)···H(5Ba) <sub>water</sub> | 2.12 Å | $\sum r_{vdW}(N,H)$ 2.74 Å |
|                           | N(8)···H(5A) <sub>water</sub>  | 2.13 Å |                            |
|                           | O(1)···H(3B) <sub>water</sub>  | 1.88 Å | $\sum r_{vdW}(O,H)$ 2.64 Å |
|                           | O(2)···H(4A) <sub>water</sub>  | 1.95 Å |                            |

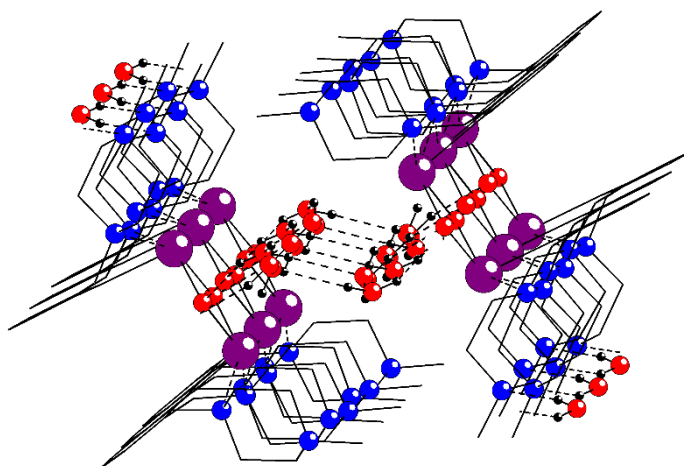

**Figure S14.** View along *a* axis of the chain polymer in the crystal of 4·4H<sub>2</sub>O (only hydrogen atoms of water molecules are shown).

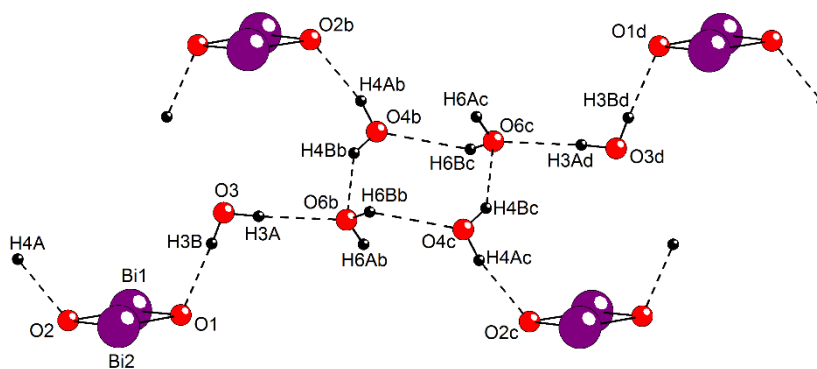

**Figure S15.** View of a hexameric cluster of water molecules connected to four dinuclear units of **4** through O···H hydrogen bonds in the crystal of 4·4H<sub>2</sub>O (only hydrogen atoms of water molecules are shown) [symmetry equivalent atoms ( $1-x$ ,  $1-y$ ,  $1-z$ ), ( $1+x$ ,  $y$ ,  $z$ ) and ( $2-x$ ,  $1-y$ ,  $1-z$ ) are given by “b”, “c” and “d”, respectively].

|   |                         |                                 |        |                                          |
|---|-------------------------|---------------------------------|--------|------------------------------------------|
| - | intermolecular distance | O(6b)···H(3A) <sub>water</sub>  | 2.12 Å | $\sum r_{\text{vdW}}(\text{O,H})$ 2.64 Å |
|   |                         | O(6b)···H(4Bb) <sub>water</sub> | 2.11 Å |                                          |
|   |                         | O(4c)···H(6Bb) <sub>water</sub> | 2.30 Å |                                          |

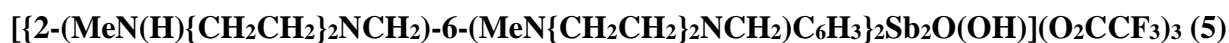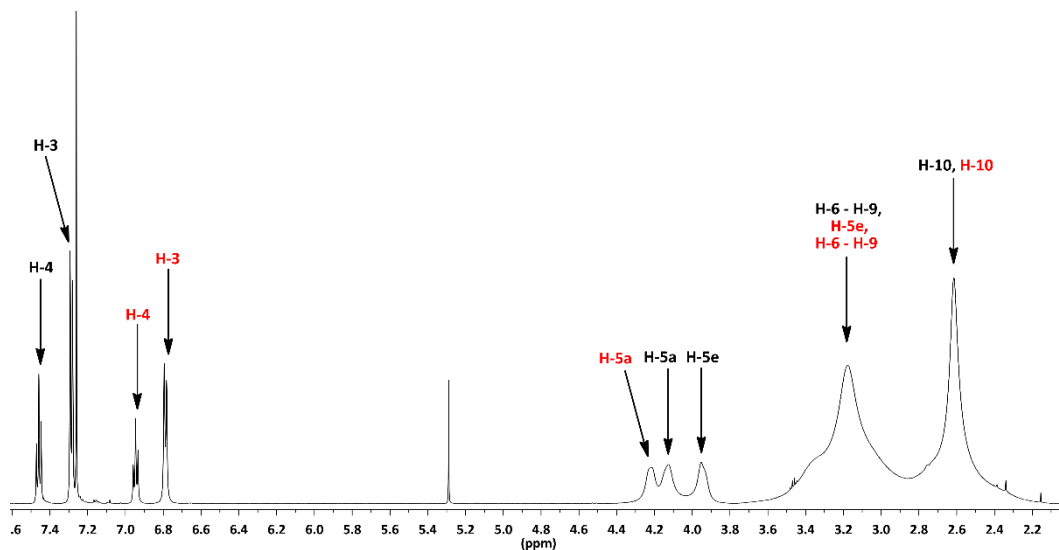

**Figure S16.**  $^1\text{H}$  NMR (600 MHz,  $\text{CDCl}_3$ ) spectrum of compound **5**, at r.t. (isomer **5a** – black; isomer **5b** – red).

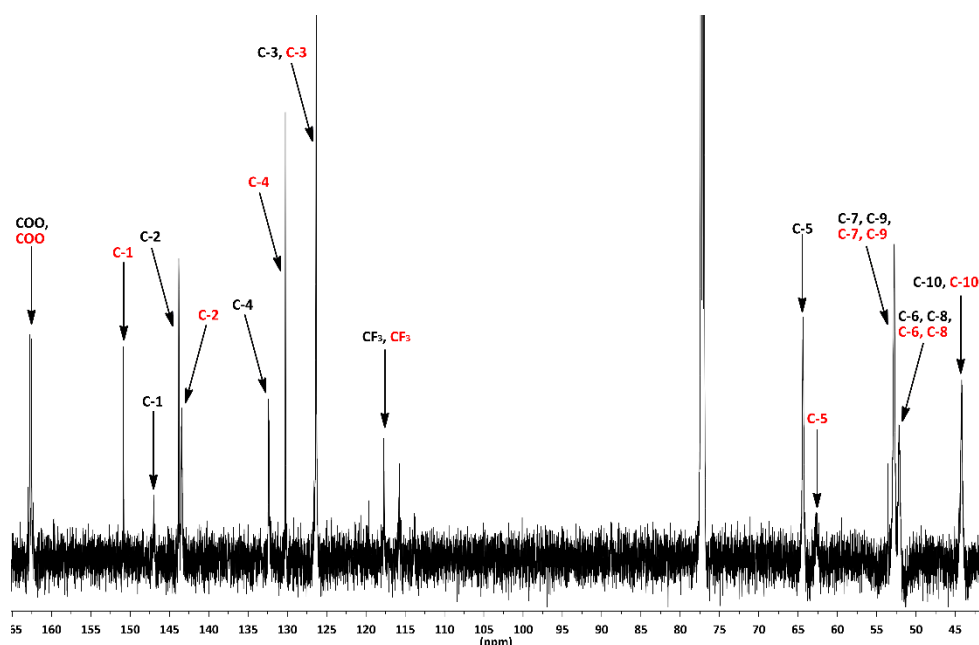

**Figure S17.**  $^{13}\text{C}$  NMR (151 MHz,  $\text{CDCl}_3$ ) spectrum of compound **5**, at r.t. (isomer **5a** – black; isomer **5b** – red).

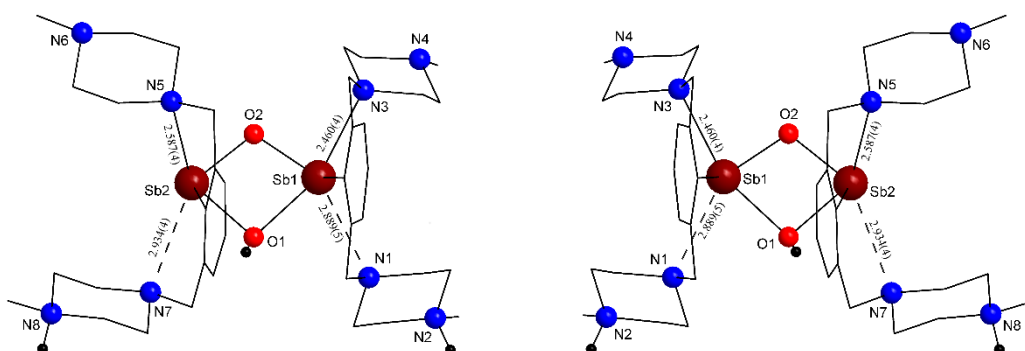

**Figure S18.** Structure of cations *syn*-( $\text{C}_{\text{Sb1}}, \text{pS}_{\text{N1}}, \text{pR}_{\text{N3}}$ )( $\text{A}_{\text{Sb2}}, \text{pR}_{\text{N7}}, \text{pS}_{\text{N5}}$ )-**5** (left) and *syn*-( $\text{A}_{\text{Sb1}}, \text{pR}_{\text{N1}}, \text{pS}_{\text{N3}}$ )( $\text{C}_{\text{Sb2}}, \text{pS}_{\text{N7}}, \text{pR}_{\text{N5}}$ )-**5** (right) in the crystal of **5** (only hydrogen atoms attached to oxygen and nitrogen atoms are shown).

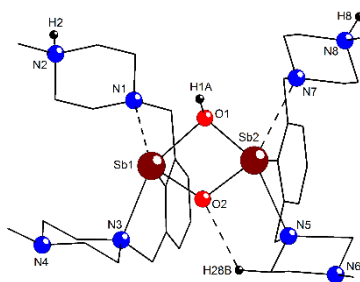

**Figure S19.** Structure of cation in the crystal of  $5 \cdot \text{H}_2\text{O} \cdot \text{C}_6\text{H}_5\text{Me}$ , showing the intramolecular  $\text{O} \cdots \text{H}$  contacts (only hydrogen atoms involved in intramolecular contacts are shown).

- intramolecular distance  $\text{O}(2) \cdots \text{H}(28\text{B})_{\text{methylene}}$  2.50 Å  $\sum r_{\text{vdW}}(\text{O}, \text{H})$  2.60 Å

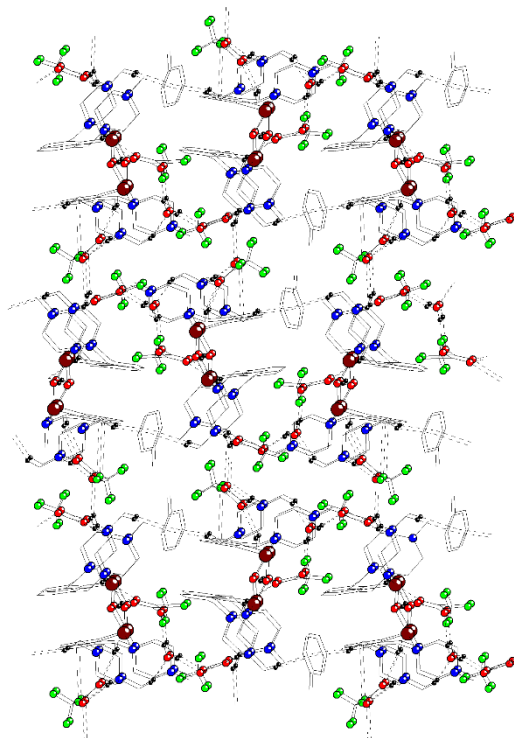

**Figure S20.** View along  $a$  axis of the 3D architecture based on  $\text{O} \cdots \text{H}$  hydrogen bonds as well as  $\text{O} \cdots \text{H}$ ,  $\text{C}-\text{H} \cdots \pi$  ( $\text{Ar}_{\text{centroid}}$ ) and  $\text{C}-\text{F} \cdots \pi$  ( $\text{Ar}_{\text{centroid}}$ ) contacts in the crystal of  $5 \cdot \text{H}_2\text{O} \cdot \text{C}_6\text{H}_5\text{Me}$  (only hydrogen atoms involved in inter cation/anion/water contacts are shown) [symmetry equivalent atoms  $(I+x, y, z)$ ,  $(I+x, 0.5-y, -0.5+z)$ ,  $(-I+x, y, z)$ ,  $(-I-x, 0.5+y, 0.5-z)$  and  $(x, 0.5-y, -0.5+z)$  are given by “a”, “b”, “c”, “d” and “e”, respectively].

|                                     |                                                                                                                                 |                                 |                                                  |
|-------------------------------------|---------------------------------------------------------------------------------------------------------------------------------|---------------------------------|--------------------------------------------------|
| - inter cation/anion/water distance | $\text{O}(3\text{a})_{\text{anion}} \cdots \text{H}(1\text{A})_{\text{cation}}$                                                 | 1.81 Å                          | $\sum r_{\text{vdW}}(\text{O}, \text{H})$ 2.60 Å |
|                                     | $\text{O}(3\text{a})_{\text{anion}} \cdots \text{H}(33\text{A})_{\text{cation}}$                                                | 2.44 Å                          |                                                  |
|                                     | $\text{O}(4\text{a})_{\text{anion}} \cdots \text{H}(9\text{C})_{\text{water}}$                                                  | 2.15 Å                          |                                                  |
|                                     | $\text{O}(5\text{b})_{\text{anion}} \cdots \text{H}(8)_{\text{cation}}$                                                         | 1.75 Å                          |                                                  |
|                                     | $\text{O}(6\text{b})_{\text{anion}} \cdots \text{H}(8)_{\text{cation}}$                                                         | 2.57 Å                          |                                                  |
|                                     | $\text{O}(6\text{a})_{\text{anion}} \cdots \text{H}(9\text{D})_{\text{water}}$                                                  | 1.93 Å                          |                                                  |
|                                     | $\text{O}(7)_{\text{anion}} \cdots \text{H}(2\text{c})_{\text{cation}}$                                                         | 1.88 Å                          |                                                  |
|                                     | $\text{O}(7)_{\text{anion}} \cdots \text{H}(33\text{Bd})_{\text{cation}}$                                                       | 2.56 Å                          |                                                  |
|                                     | $\text{O}(8)_{\text{anion}} \cdots \text{H}(2\text{c})_{\text{cation}}$                                                         | 2.26 Å                          |                                                  |
|                                     | $\text{O}(8)_{\text{anion}} \cdots \text{H}(13\text{A})_{\text{cation}}$                                                        | 2.49 Å                          |                                                  |
|                                     | $\text{O}(9)_{\text{water}} \cdots \text{H}(12\text{B})_{\text{cation}}$                                                        | 2.57 Å                          |                                                  |
|                                     | $\text{C}(7)-\text{H}(7\text{B})_{\text{methylene}} \cdots \text{Ar}_{\text{centroid}}\{\text{C}(43)-\text{C}(48)\}$            | 2.75 Å<br>$\gamma = 7.1^\circ$  |                                                  |
|                                     | $\text{C}(36\text{e})-\text{H}(36\text{Be})_{\text{methylene}} \cdots \text{Ar}_{\text{centroid}}\{\text{C}(43)-\text{C}(48)\}$ | 2.71 Å<br>$\gamma = 10.5^\circ$ |                                                  |
|                                     | $\text{C}(41)-\text{F}(7)_{\text{anion}} \cdots \text{Ar}_{\text{centroid}}\{\text{C}(1)-\text{C}(6)\}$                         | 3.81 Å<br>$\gamma = 24.1^\circ$ |                                                  |

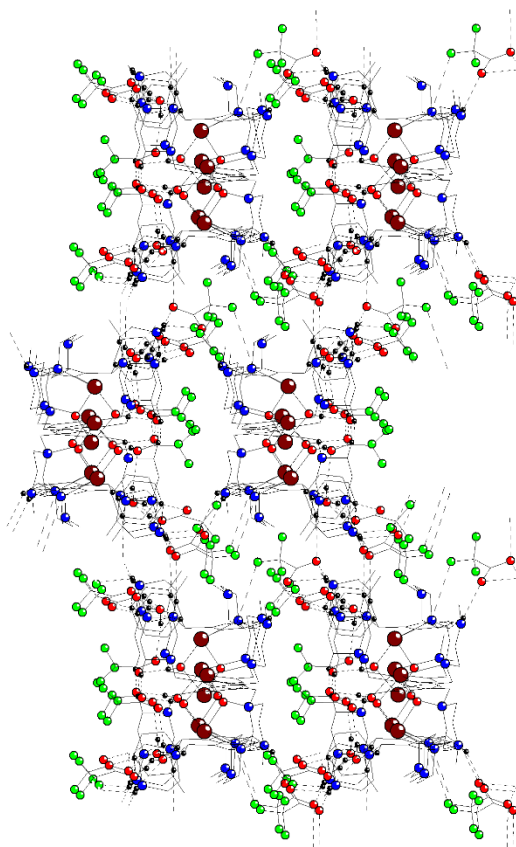

**Figure S21.** View along *c* axis of the 3D architecture based on O···H hydrogen bonds as well as O···H, C-H··· $\pi$  ( $A_{\text{centroid}}$ ) and C-F··· $\pi$  ( $A_{\text{centroid}}$ ) contacts in the crystal of  $5 \cdot \text{H}_2\text{O} \cdot \text{C}_6\text{H}_5\text{Me}$  (only hydrogen atoms involved in inter cation/anion/water contacts are shown).

“[2,6-{MeN(CH<sub>2</sub>CH<sub>2</sub>)<sub>2</sub>NCH<sub>2</sub>]<sub>2</sub>C<sub>6</sub>H<sub>3</sub>]SbCO<sub>3</sub>” (6)

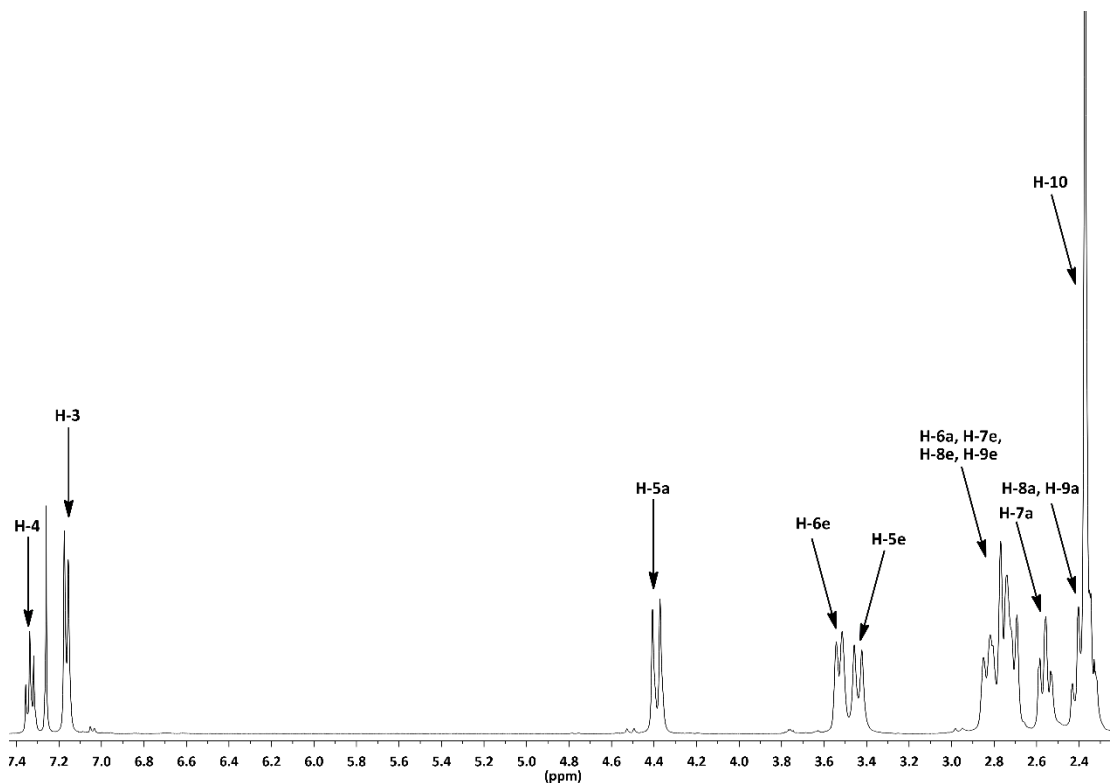

Figure S22. <sup>1</sup>H NMR (400 MHz, CDCl<sub>3</sub>) spectrum of compound 6, at r.t.

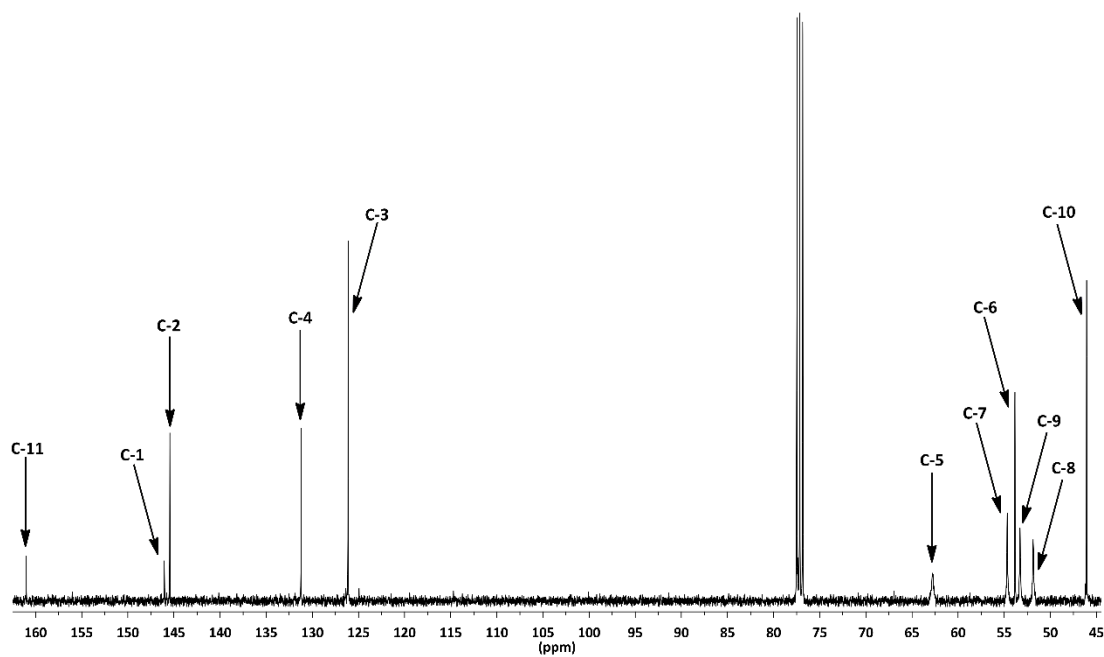

Figure S23. <sup>13</sup>C NMR (101 MHz, CDCl<sub>3</sub>) spectrum of compound 6, at r.t.

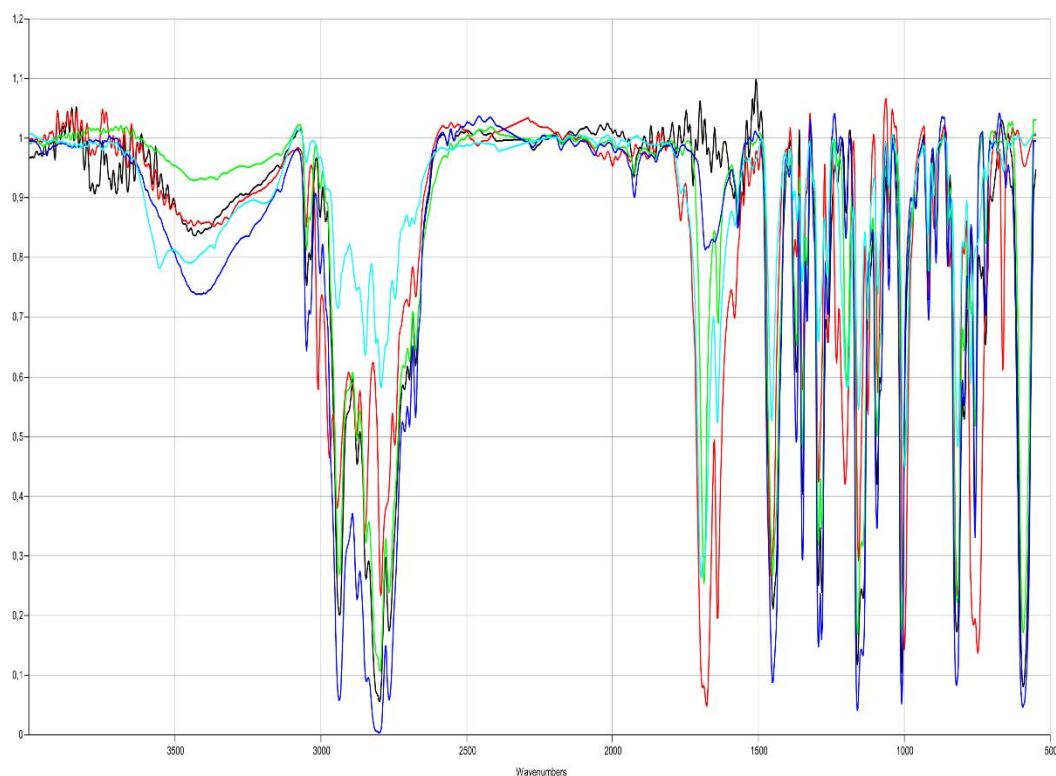

**Figure S24.** Infrared spectra (KBr pellets) of **3** (black line), **6** (red line) obtained from **3**, **6** heated at 110 °C for 4 h (green line) – partly converted to **3** –, **6** heated at 110 °C for 9 h (blue line) – almost completely converted to **3** –, and **6** (cyan line) obtained from the previously decomposed sample.

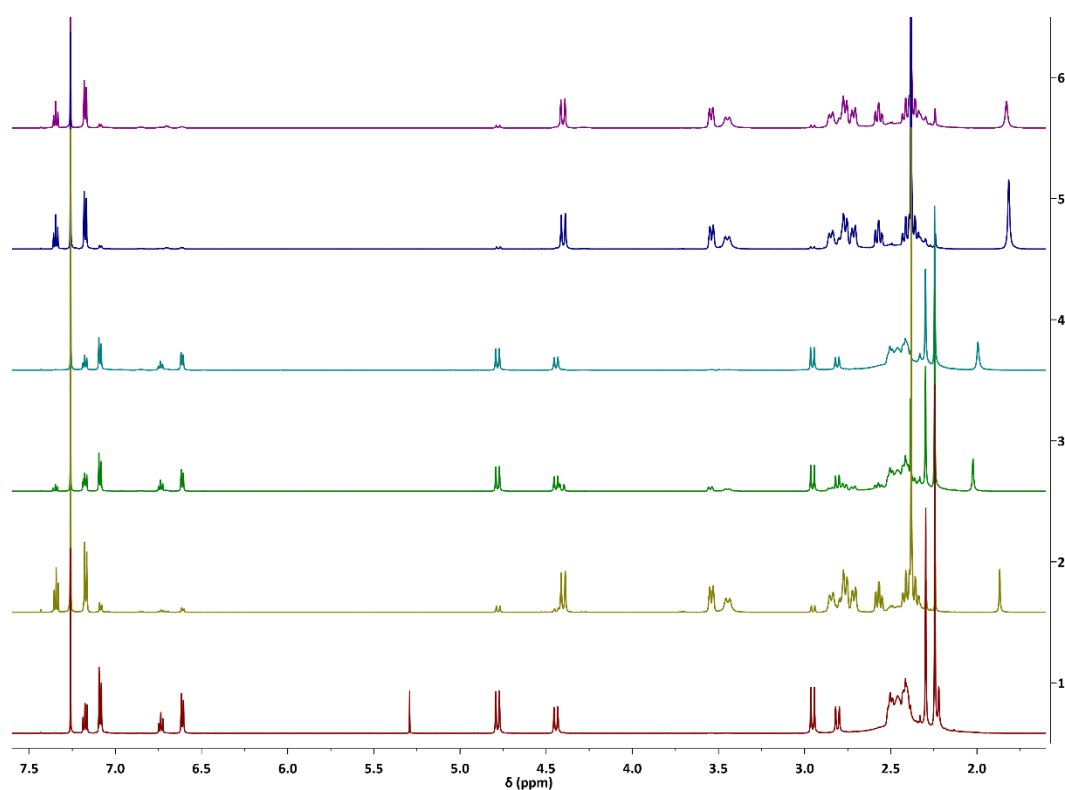

**Figure S25.**  $^1\text{H}$  NMR (600 MHz) spectra of **3** (spectrum 1), **6** obtained from **3** (spectrum 2), **6** heated at 110 °C for 4 h (spectrum 3) – partly converted to **3** –, **6** heated at 110 °C for 9 h (spectrum 4) – almost completely converted to **3** –, **6** obtained from the previously decomposed sample (spectrum 5), **6** obtained from the previously decomposed sample dried at reduced pressure ( $10^{-3}$  mbar) for 1 h (spectrum 6). All spectra were recorded in  $\text{CDCl}_3$ .



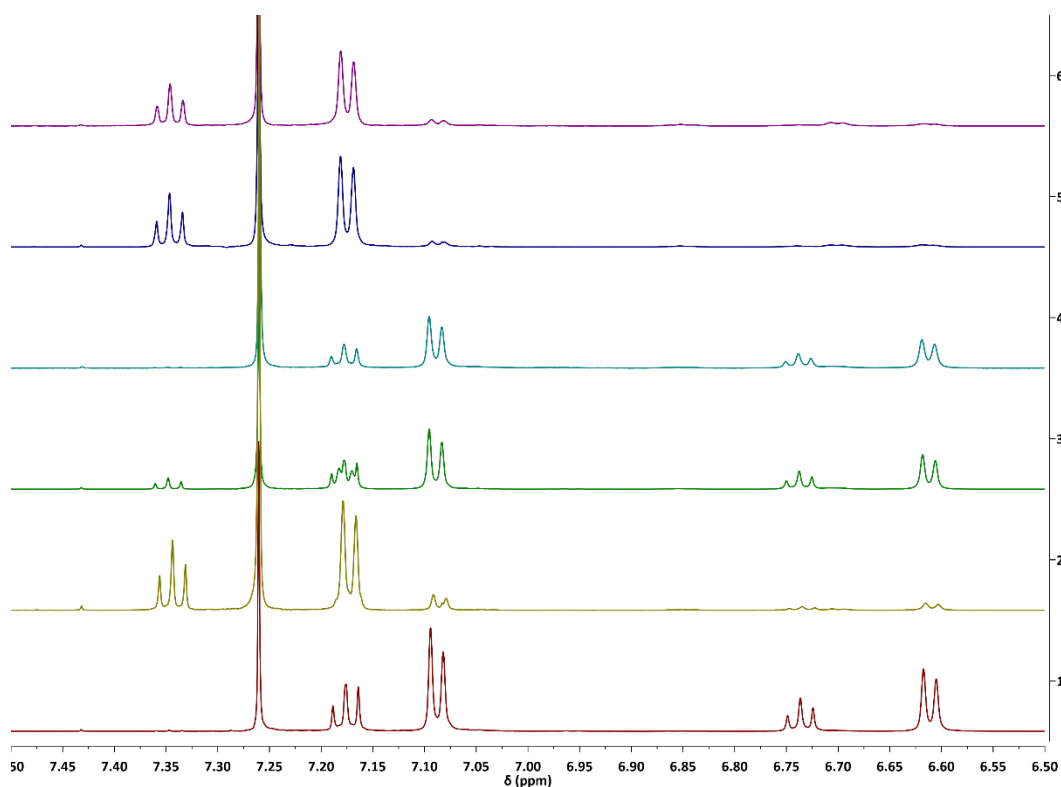

**Figure S26.** Aromatic region of the  $^1\text{H}$  NMR (600 MHz) spectra of **3** (spectrum 1), **6** obtained from **3** (spectrum 2), **7** heated at 110 °C for 4 h (spectrum 3) – partly converted to **3** –, **6** heated at 110 °C for 9 h (spectrum 4) – almost completely converted to **3** –, **6** obtained from the previously decomposed sample (spectrum 5), **6** obtained from the previously decomposed sample dried at reduced pressure ( $10^{-3}$  mbar) for 1 h (spectrum 6). All spectra were recorded in  $\text{CDCl}_3$ .

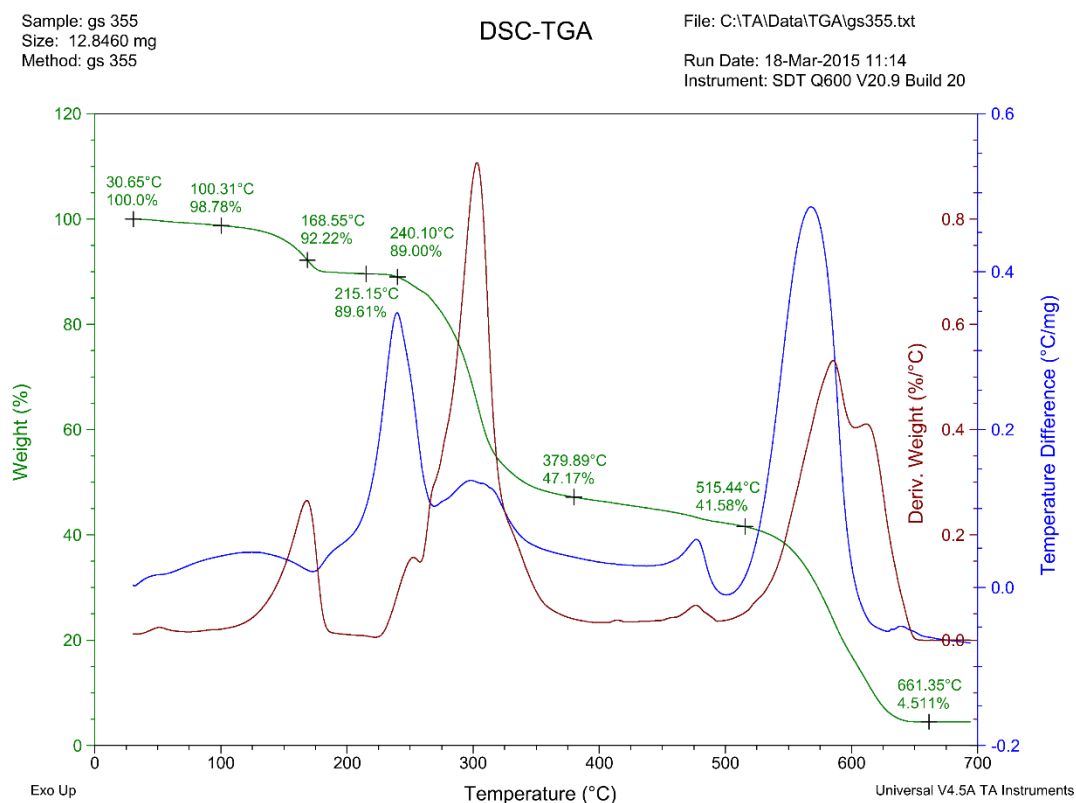

**Figure S27.** TGA analysis of the sample of **6** dried at reduced pressure ( $10^{-3}$  mbar) for 1 h.

“[2,6-{MeN(CH<sub>2</sub>CH<sub>2</sub>)<sub>2</sub>NCH<sub>2</sub>]<sub>2</sub>C<sub>6</sub>H<sub>3</sub>]BiCO<sub>3</sub>” (7)

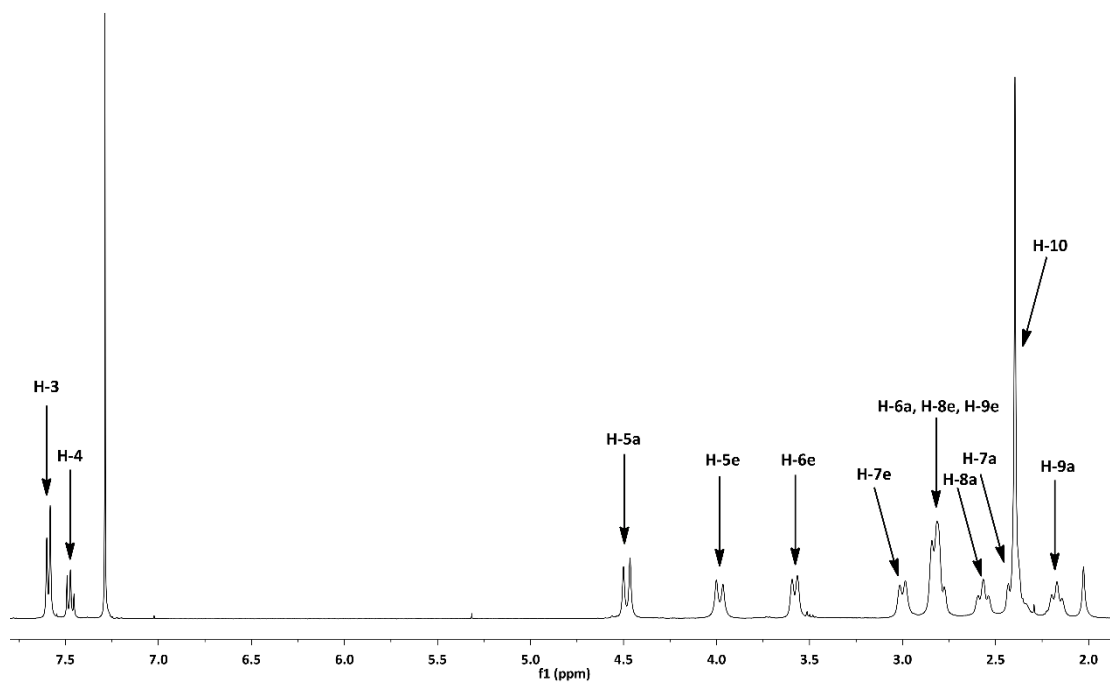

Figure S28. <sup>1</sup>H NMR (400 MHz, CDCl<sub>3</sub>) spectrum of compound 7, at r.t.

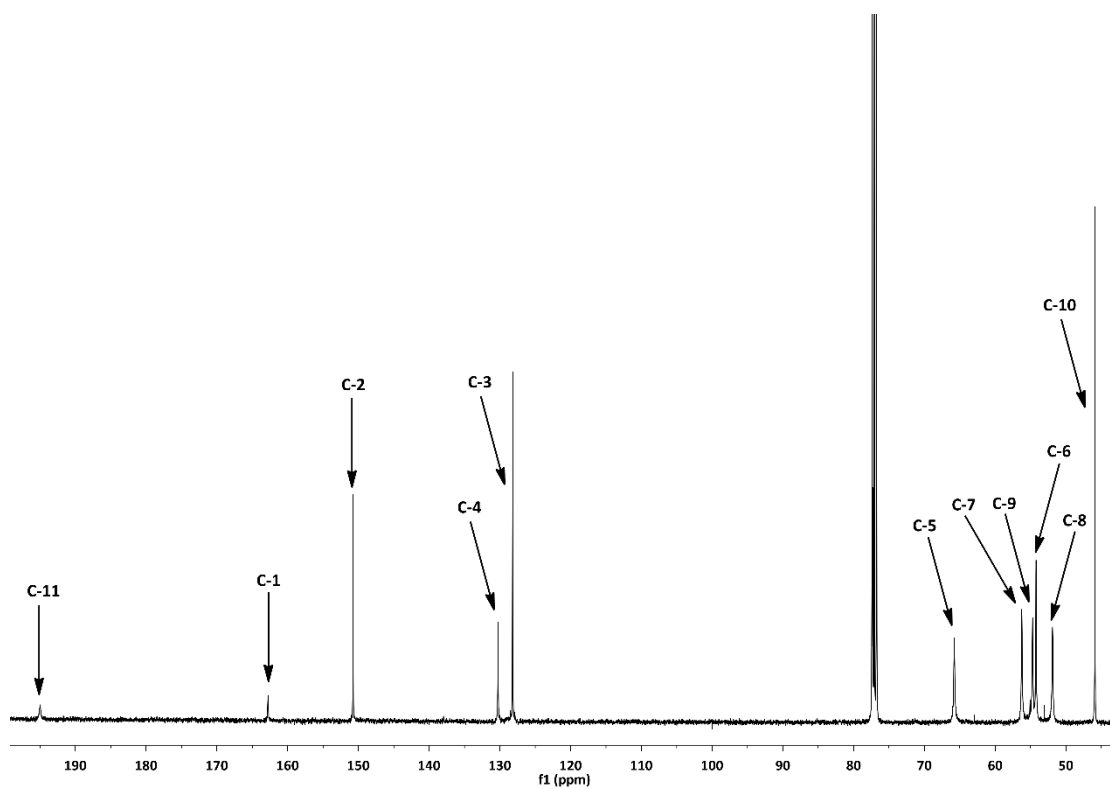

Figure S29. <sup>13</sup>C NMR (101 MHz, CDCl<sub>3</sub>) spectrum of compound 7, at r.t.

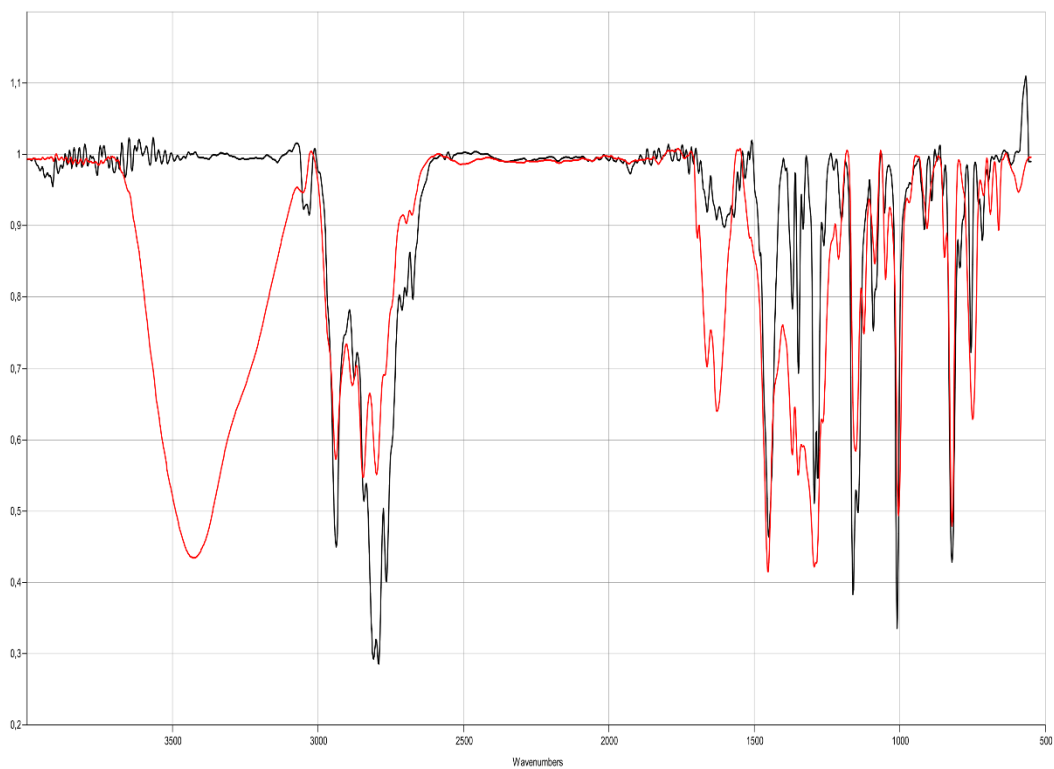

**Figure S30.** IR spectra (KBr pellets) of compound **4** (black line) and **7** (red line).

[2,6-{MeN(CH<sub>2</sub>CH<sub>2</sub>)<sub>2</sub>NCH<sub>2</sub>}<sub>2</sub>C<sub>6</sub>H<sub>3</sub>]Sb[O(O)CC(O)O] (**8**)

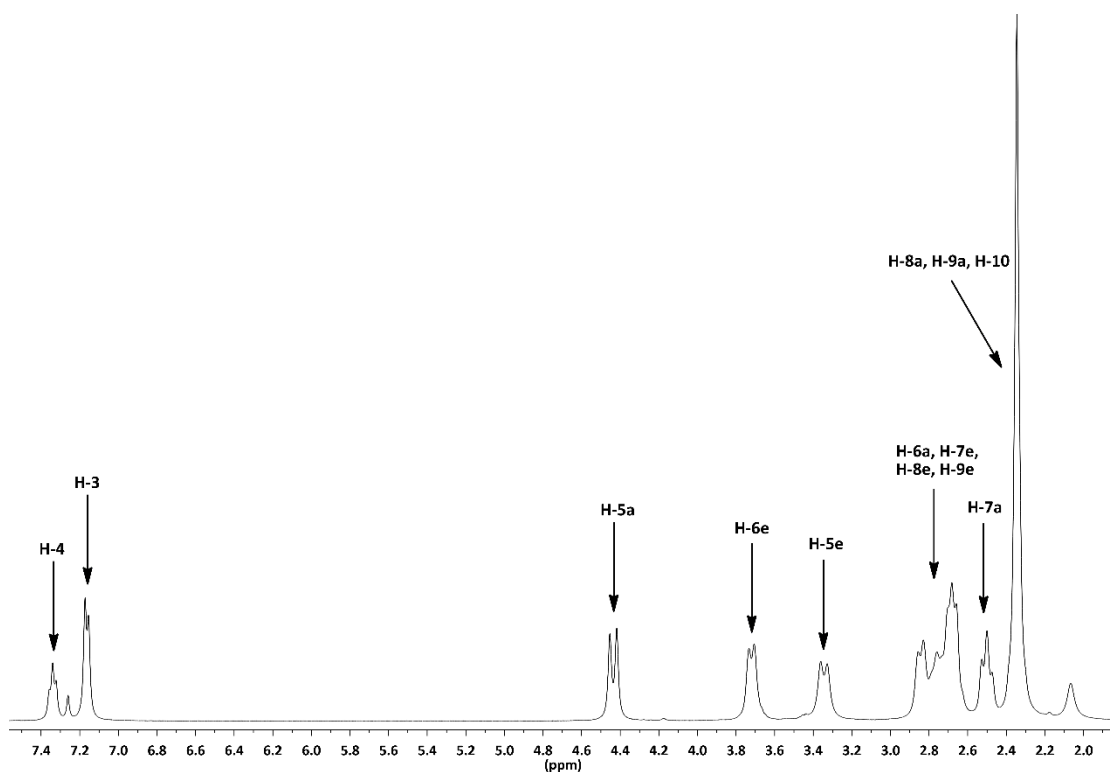

Figure S31. <sup>1</sup>H NMR (400 MHz, CDCl<sub>3</sub>) spectrum of compound **8**, at r.t.

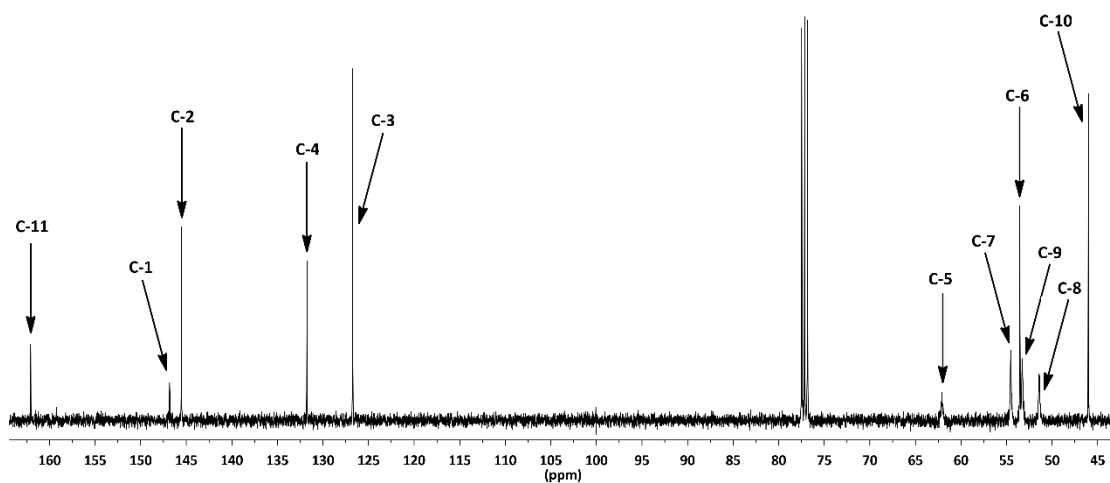

Figure S32. <sup>13</sup>C NMR (101 MHz, CDCl<sub>3</sub>) spectrum of compound **8**, at r.t.

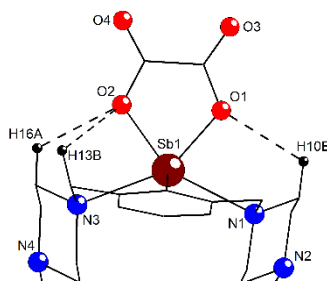

Figure S33. Molecular structure of **8**, showing the intramolecular O···H contacts (only hydrogen atoms involved in intramolecular contacts are shown).

|                           |                                    |        |                            |
|---------------------------|------------------------------------|--------|----------------------------|
| - intramolecular distance | O(1)···H(10B) <sub>methylene</sub> | 2.58 Å | $\sum r_{vdW}(O,H)$ 2.60 Å |
|                           | O(2)···H(13B) <sub>methylene</sub> | 2.54 Å |                            |
|                           | O(2)···H(16A) <sub>methylene</sub> | 2.57 Å |                            |

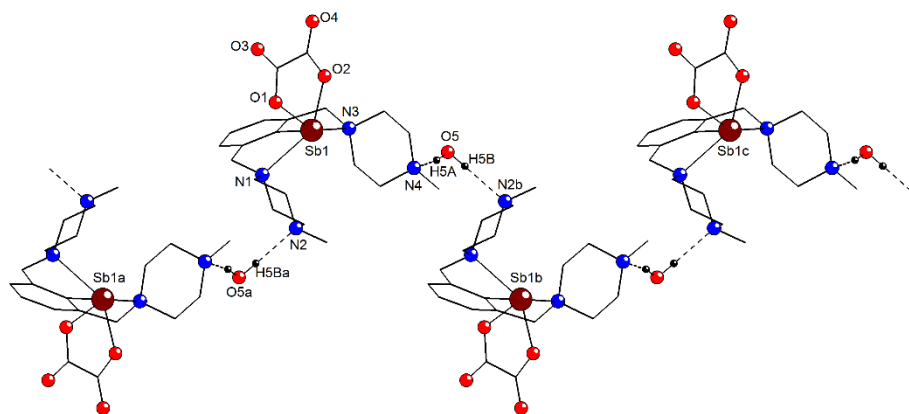

**Figure S34.** View of the chain polymer based on  $N \cdots H_{\text{water}}$  hydrogen bonds in the crystal of  $\mathbf{8} \cdot \text{H}_2\text{O}$  (only hydrogen atoms involved in intermolecular contacts are shown) [symmetry equivalent atoms  $(1+x, 0.5-y, 0.5+z)$ ,  $(-1+x, 0.5-y, -0.5+z)$  and  $(-2+x, y, -1+z)$  are given by “a”, “b” and “c”, respectively].

- intermolecular distance       $N(2) \cdots H(5Ba)_{\text{water}}$        $2.04 \text{ \AA}$        $\sum r_{\text{vdW}}(N,H) 2.74 \text{ \AA}$   
                                           $N(4) \cdots H(5A)_{\text{water}}$        $2.02 \text{ \AA}$

- no further contacts between parallel chains.

$[(2,6\text{-[MeN(CH}_2\text{CH}_2)_2\text{NCH}_2]_2\text{C}_6\text{H}_3]\text{Sb[O}_2\text{-1,2-C}_6\text{H}_3\text{-3-(CH}_2\text{)}_2\text{NH}_3]\text{Cl}$  (**9**)

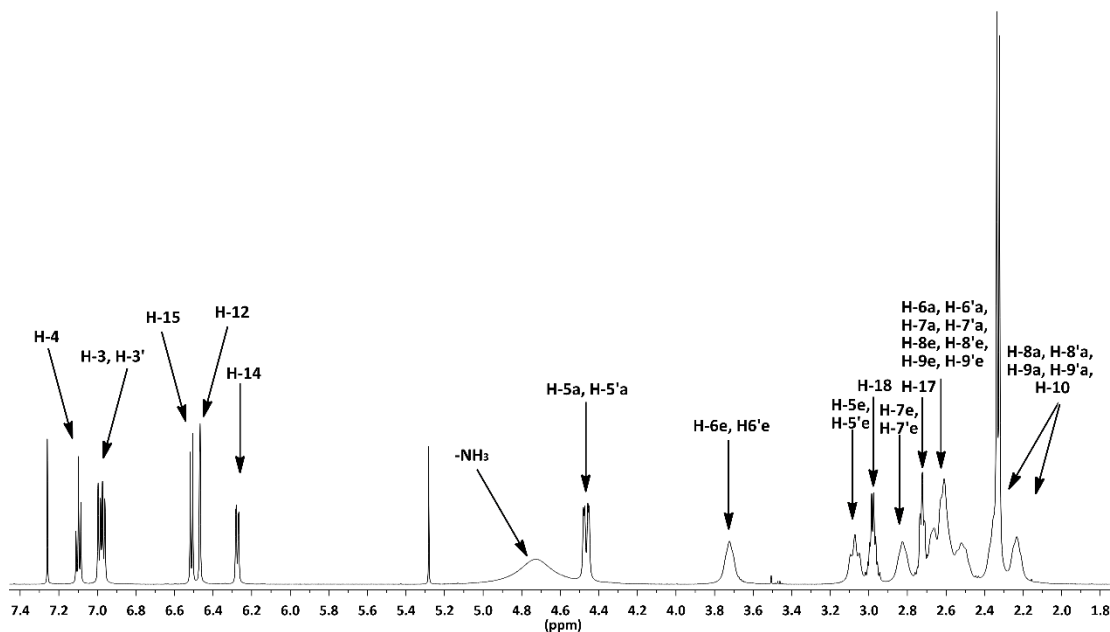

Figure S35.  $^1\text{H}$  NMR (600 MHz,  $\text{CDCl}_3$ ) spectrum of compound **9**, at r.t.

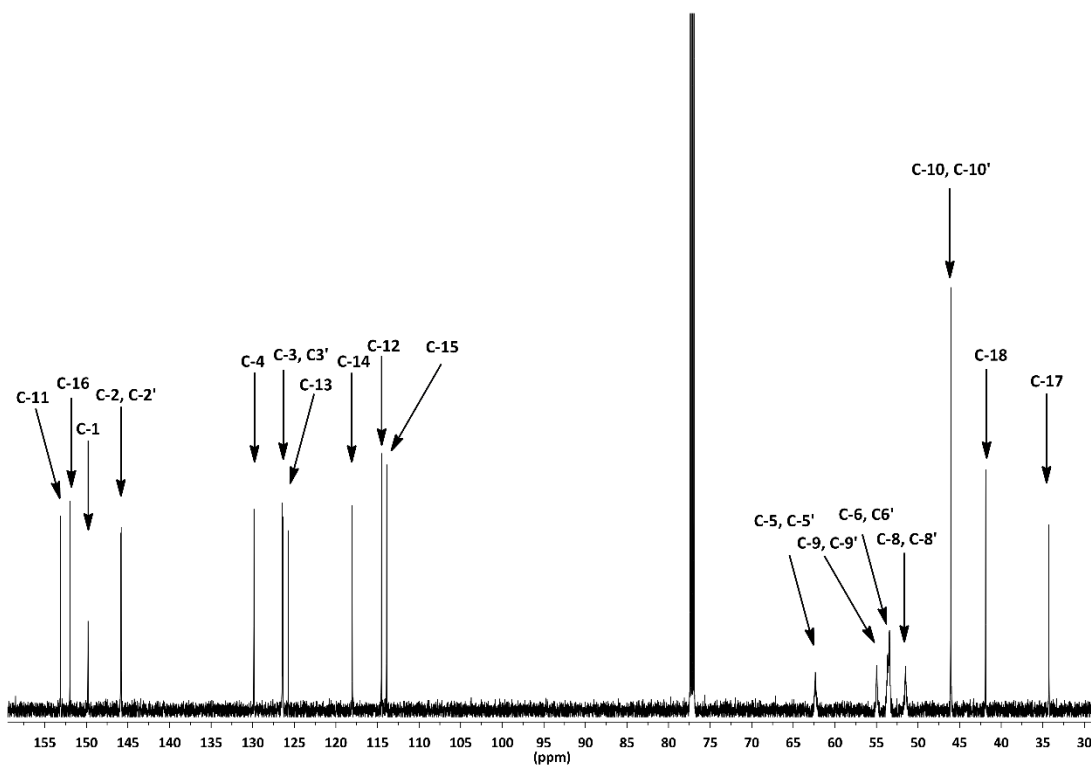

Figure S36.  $^{13}\text{C}$  NMR (151 MHz,  $\text{CDCl}_3$ ) spectrum of compound **9**, at r.t.

**[2,6-{MeN(CH<sub>2</sub>CH<sub>2</sub>)<sub>2</sub>NCH<sub>2</sub>}<sub>2</sub>C<sub>6</sub>H<sub>3</sub>]Sb(OCH<sub>2</sub>)<sub>2</sub> (10)**

<sup>1</sup>H NMR (301 MHz, CDCl<sub>3</sub>, 333 K): δ 2.31 (s, 6H, H-10), 2.35-2.91 (m br, 16H, H-6 – H-9), 2.95 (d, <sup>2</sup>J<sub>H-5a,H-5e</sub> = 13.2 Hz, 2H, H-5e), 3.47-3.57 (m, AA'BB' vicinal spin system, 2H, H-11a), 3.68-3.81 (m, AA'BB' vicinal spin system, 2H, H-11e), 4.52 (d, <sup>2</sup>J<sub>H-5a,H-5e</sub> = 13.2 Hz, 2H, H-5a), AB<sub>2</sub> spin system with B at δ 7.02 ppm (d, <sup>3</sup>J<sub>H-3,H-4</sub> = 7.4 Hz, 2H, H-3) and A at δ 7.14 ppm (t, <sup>3</sup>J<sub>H-3,H-4</sub> = 7.4 Hz, 1H, H-4).

<sup>13</sup>C{<sup>1</sup>H} NMR (76 MHz, CDCl<sub>3</sub>, 333 K): δ 46.11 (C-10), 52.45 (C-6 and C-8), 54.65 (C-7 and C-9), 62.60 (C-5), 67.08 (C-11), 126.36 (C-3), 128.75 (C-4), 146.23 (C-2), 151.54 (C-1).

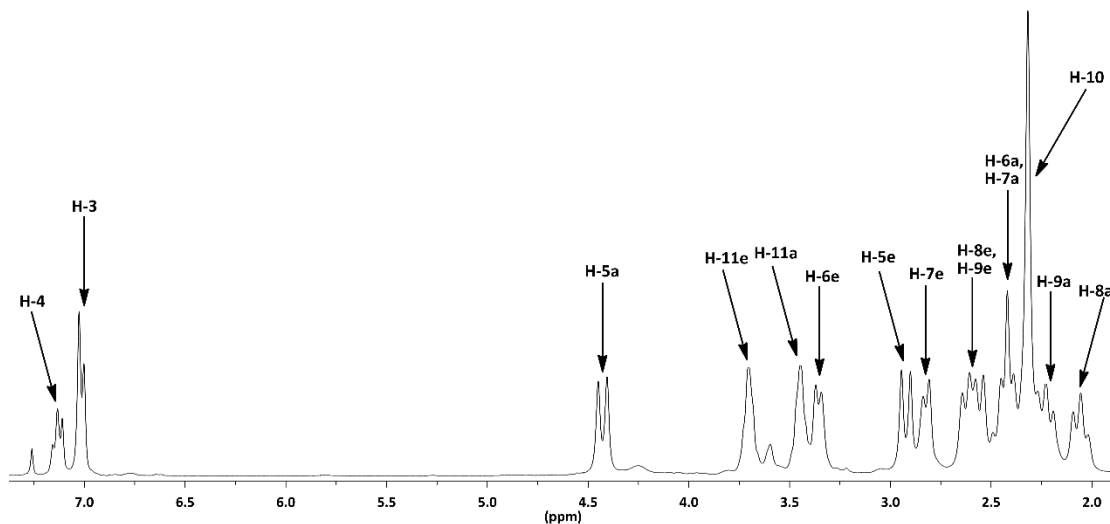

**Figure S37.** <sup>1</sup>H NMR (301 MHz, CDCl<sub>3</sub>) spectrum of compound **10**, at -60 °C.

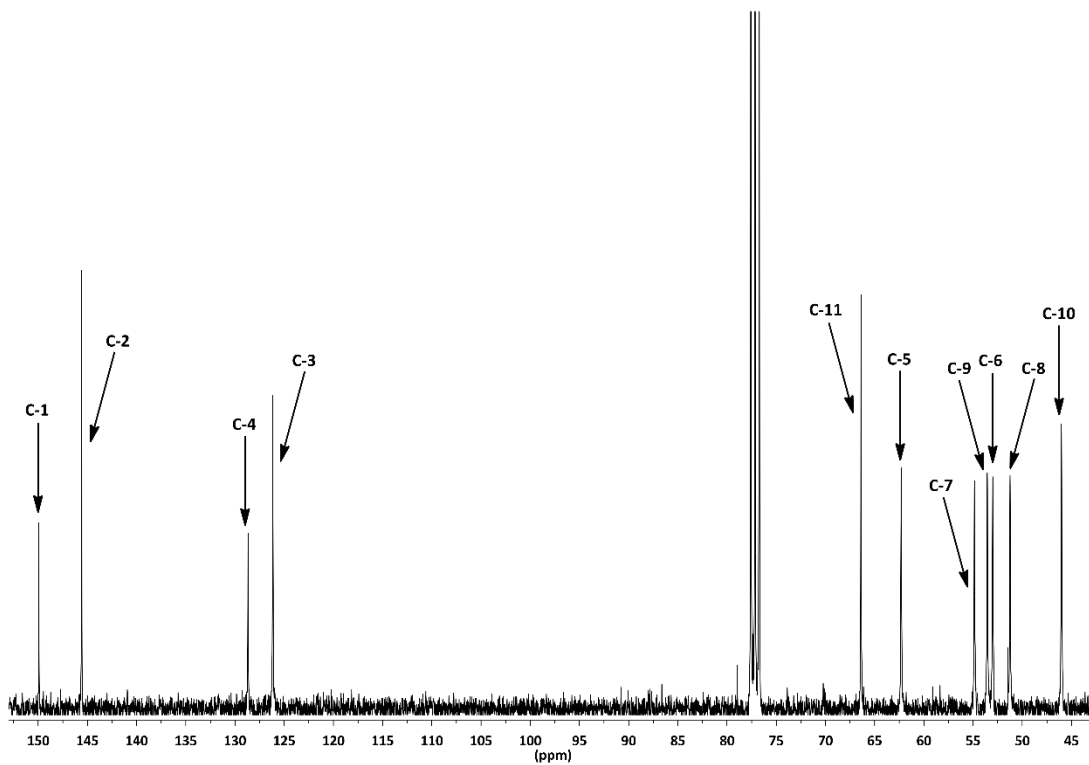

**Figure S38.** <sup>13</sup>C NMR (76 MHz, CDCl<sub>3</sub>) spectrum of compound **10**, at -60 °C.

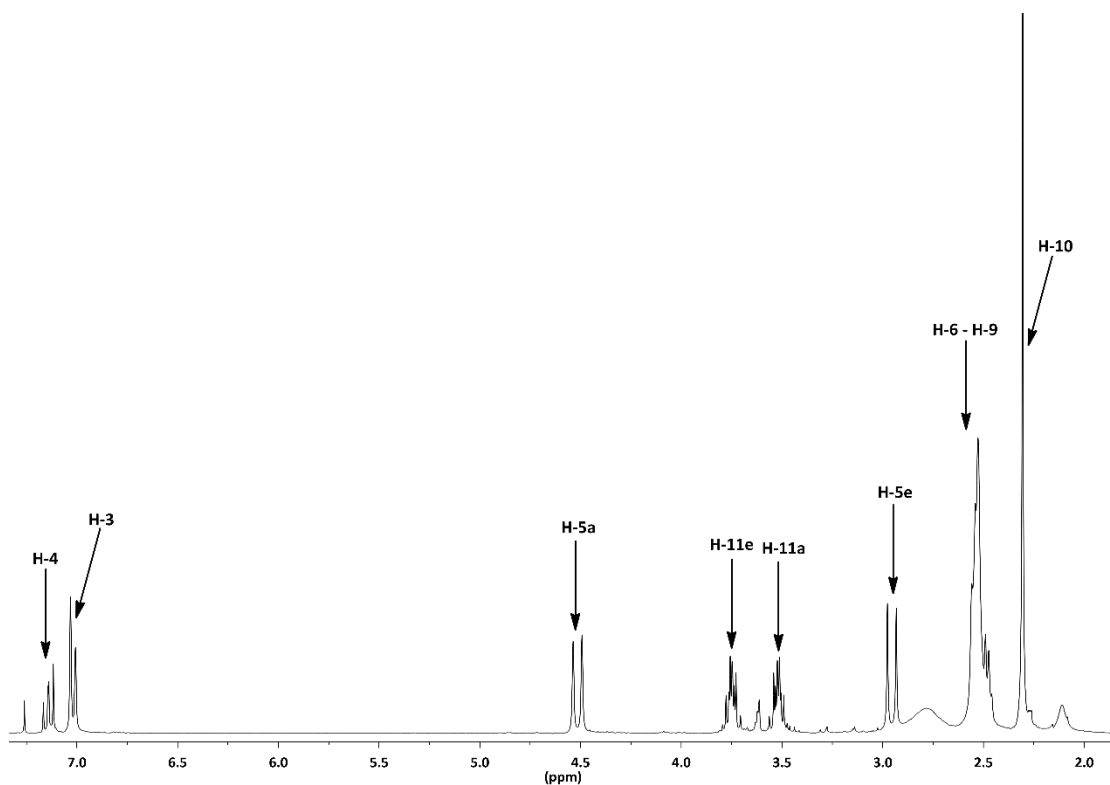

**Figure S39.**  $^1\text{H}$  NMR (301 MHz,  $\text{CDCl}_3$ ) spectrum of compound **10**, at 60 °C.

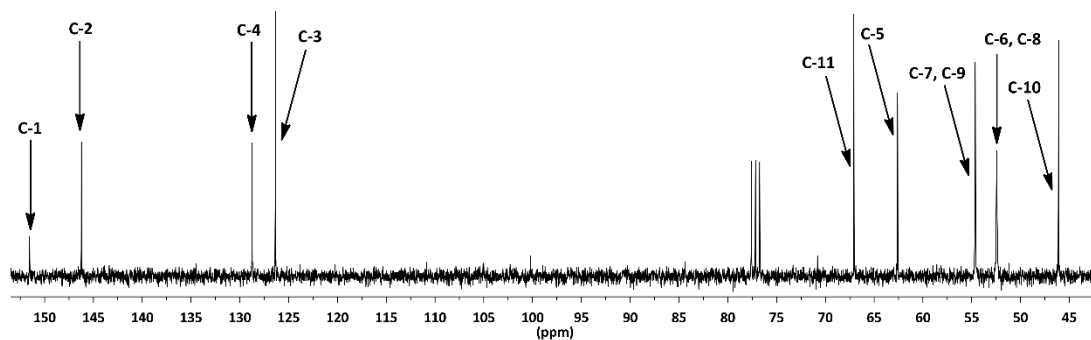

**Figure S40.**  $^{13}\text{C}$  NMR (76 MHz,  $\text{CDCl}_3$ ) spectrum of compound **10**, at 60 °C.

- the crystal contains a 1:1 mixture of  $(\delta\text{-}pS_{N1}, pR_{N3})$ - and  $(\lambda\text{-}pR_{N1}, pS_{N3})$ -**10** isomers

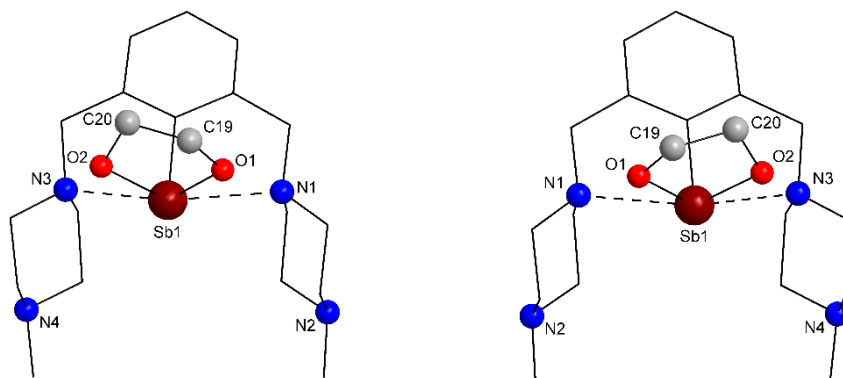

**Figure S41.** Molecular structure of isomers  $(\delta\text{-}pS_{N1}, pR_{N3})$ -**10** (left) and  $(\lambda\text{-}pR_{N1}, pS_{N3})$ -**10** (right) in the crystal of **10**.



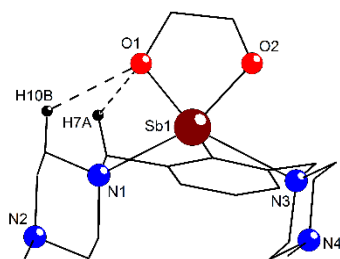

**Figure S42.** Molecular structure of **10**, showing the intramolecular O $\cdots$ H contacts (only hydrogen atoms involved in intramolecular contacts are shown).

|                           |                                           |        |                            |
|---------------------------|-------------------------------------------|--------|----------------------------|
| - intramolecular distance | O(1) $\cdots$ H(7A) <sub>methylene</sub>  | 2.50 Å | $\sum r_{vdW}(O,H)$ 2.60 Å |
|                           | O(1) $\cdots$ H(10B) <sub>methylene</sub> | 2.47 Å |                            |

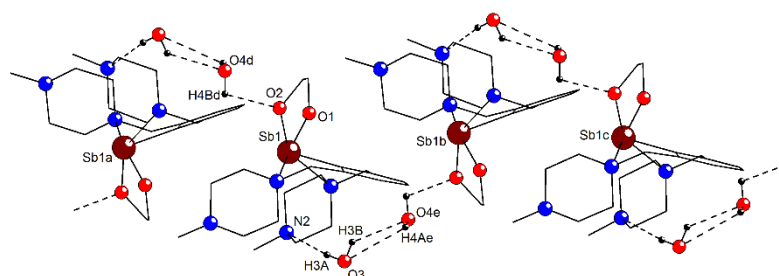

**Figure S43.** View of the chain polymer of ( $\lambda$ - $pR_{N1}, pS_{N3}$ )-**10** isomers based on N $\cdots$ H<sub>water</sub> and O $\cdots$ H<sub>water</sub> contacts in the crystal of **10**·2H<sub>2</sub>O (only hydrogen atoms involved in intermolecular contacts are shown) [symmetry equivalent atoms ( $0.5-x, 0.5+y, 0.5-z$ ), ( $0.5-x, -0.5+y, 0.5-z$ ), ( $x, -1+y, z$ ), ( $-0.5+x, 0.5-y, -0.5+z$ ) and ( $1-x, -y, 1-z$ ) are given by “a”, “b”, “c”, “d” and “e”, respectively].

|                           |                                       |        |                            |
|---------------------------|---------------------------------------|--------|----------------------------|
| - intermolecular distance | N(2) $\cdots$ H(3A) <sub>water</sub>  | 2.11 Å | $\sum r_{vdW}(N,H)$ 2.74 Å |
|                           | O(2) $\cdots$ H(4Bd) <sub>water</sub> | 2.57 Å |                            |
|                           | O(3) $\cdots$ H(4Ae) <sub>water</sub> | 2.58 Å |                            |
|                           | O(4e) $\cdots$ H(3B) <sub>water</sub> | 2.24 Å |                            |

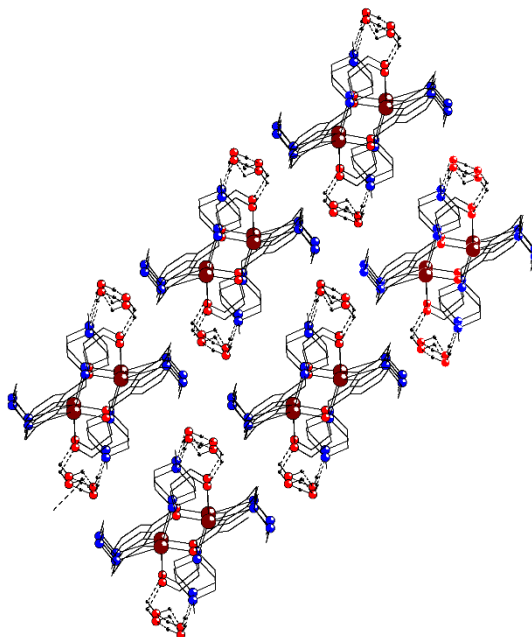

**Figure S44.** View along  $b$  axis of chain polymers of ( $\delta$ - $pS_{N1}, pR_{N3}$ )-**10** and ( $\lambda$ - $pR_{N1}, pS_{N3}$ )-**10** isomers, respectively, in the crystal of **10**·2H<sub>2</sub>O (only hydrogen atoms involved in intermolecular contacts are shown).

- no further contacts between parallel chains

[2,6-{MeN(CH<sub>2</sub>CH<sub>2</sub>)<sub>2</sub>NCH<sub>2</sub>}<sub>2</sub>C<sub>6</sub>H<sub>3</sub>]Bi(OCH<sub>2</sub>)<sub>2</sub> (**11**)

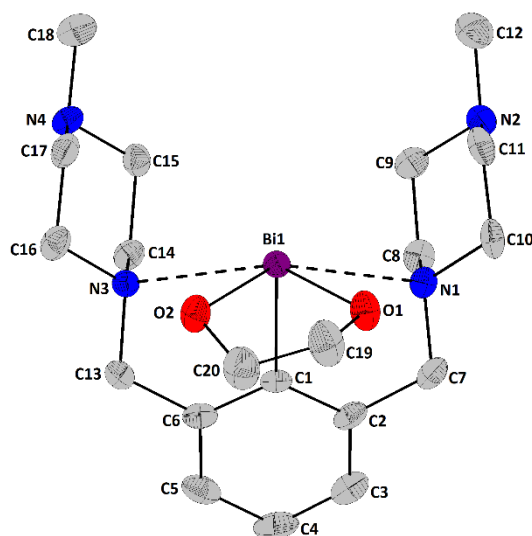

**Figure S45.** Molecular structure of the isomer ( $\lambda$ - $pR_{N1}, pS_{N3}$ )-**11**. Thermal ellipsoids are drawn at the 30% probability. Hydrogen atoms are omitted for clarity.

- the crystal contains a 1:1 mixture of ( $\delta$ - $pS_{N1}, pR_{N3}$ )- and ( $\lambda$ - $pR_{N1}, pS_{N3}$ )-**11** isomers

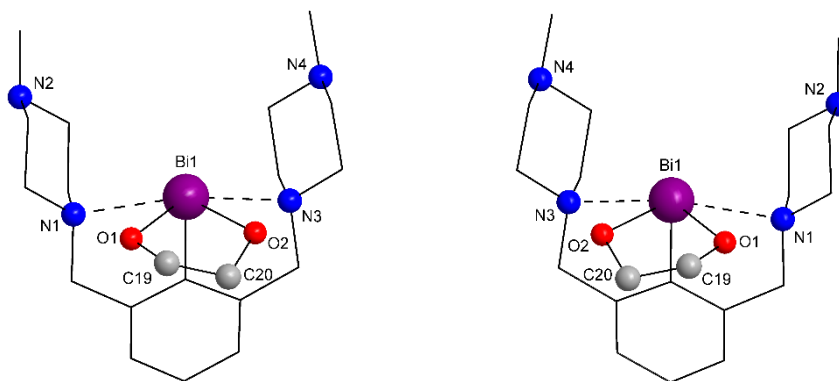

**Figure S46.** Molecular structure of isomers ( $\delta$ - $pS_{N1}, pR_{N3}$ )-**11** (left) and ( $\lambda$ - $pR_{N1}, pS_{N3}$ )-**11** (right) in the crystal of **11**·2H<sub>2</sub>O.

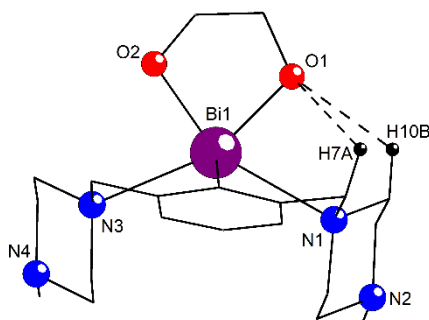

**Figure S47.** Molecular structure of **11**, showing the intramolecular O $\cdots$ H contacts (only hydrogen atoms involved in intramolecular contacts are shown).

- intramolecular distance
 

|                                           |        |                            |
|-------------------------------------------|--------|----------------------------|
| O(1) $\cdots$ H(7A) <sub>methylene</sub>  | 2.53 Å | $\sum r_{vdW}(O,H)$ 2.60 Å |
| O(1) $\cdots$ H(10B) <sub>methylene</sub> | 2.53 Å |                            |

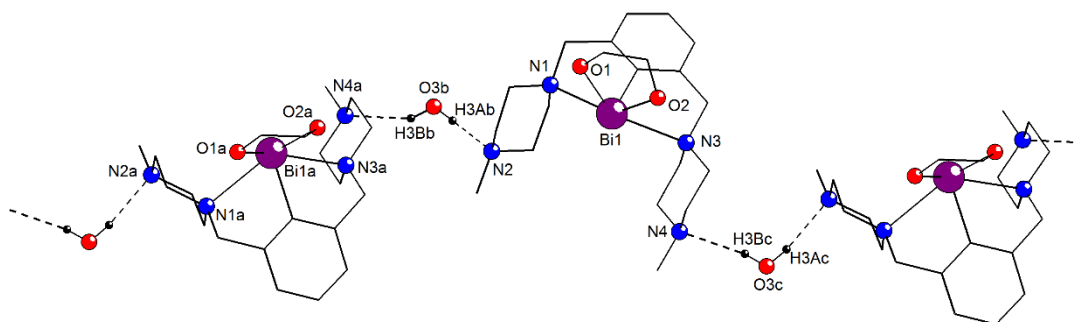

**Figure S48.** View of the chain polymer of alternating ( $\delta$ - $pS_{N1a}, pR_{N3a}$ )-**11** and ( $\lambda$ - $pR_{N1}, pS_{N3}$ )-**11** isomers based on  $N \cdots H_{\text{water}}$  hydrogen bonds in the crystal of **11**·2H<sub>2</sub>O (only hydrogen atoms involved in intermolecular contacts are shown) [symmetry equivalent atoms ( $0.5+x, 1.5-y, -0.5+z$ ), ( $1-x, 1-y, -z$ ) and ( $0.5-x, 0.5+y, 0.5-z$ ) are given by “a”, “b” and “c”, respectively].

- intermolecular distance       $N(2) \cdots H(3Ab)_{\text{water}}$       2.11 Å       $\sum r_{\text{vdW}}(N,H)$  2.74 Å
- $N(4) \cdots H(3Bc)_{\text{water}}$       2.26 Å
- no further contacts between parallel chains.

[2,6-{MeN(CH<sub>2</sub>CH<sub>2</sub>)<sub>2</sub>NCH<sub>2</sub>}<sub>2</sub>C<sub>6</sub>H<sub>3</sub>]Sb(OCMe<sub>2</sub>)<sub>2</sub> (**12**)

A solution of KOH (0.04 g, 0.81 mmol) in ethanol (25 mL) was added over a solution of **1** (0.20 g, 0.40 mmol) and pinacol (0.05 g, 0.4 mmol) in ethanol (25 mL). The reaction mixture was stirred for 24 h at room temperature, then the solvent was removed *in vacuo*. The remaining solid was solved in CHCl<sub>3</sub>, the colourless solution was dried over anh. Na<sub>2</sub>SO<sub>4</sub>, then filtered through a glass frit. The solvent was removed from the clear solution and the remaining pale yellow solid was extracted with Et<sub>2</sub>O (2x15 mL) and filtered again. Evaporation of the solvent gave **12** as a colourless solid (0.16 g, 73%), m.p. 155-160 °C.

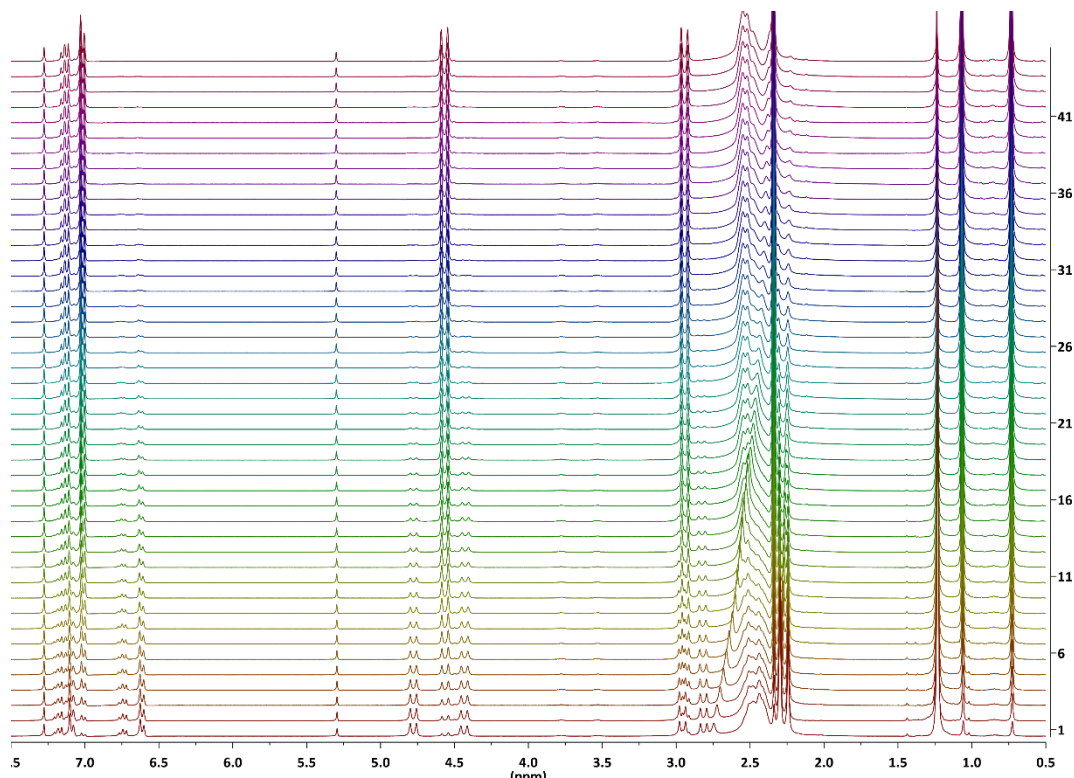

**Figure S49.** Reaction of the oxide **3** with HO(CH<sub>2</sub>)<sub>2</sub>CC(CH<sub>3</sub>)OH in CDCl<sub>3</sub> monitored by <sup>1</sup>H NMR spectroscopy (300 MHz). Spectra (1 – 45) were recorded every 5 min. after addition of pinacol to the oxide solution.

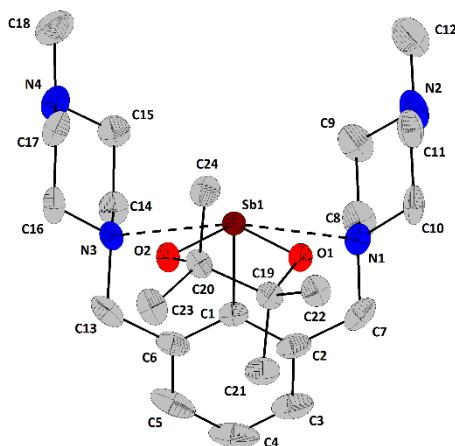

**Figure S50.** Molecular structure of the isomer ( $\delta$ -*pR*<sub>N1</sub>,*pS*<sub>N3</sub>)-**12**. Thermal ellipsoids are drawn at the 25% probability. Hydrogen atoms are omitted for clarity.

- the crystal contains a 1:1 mixture of ( $\delta$ -*pR*<sub>N1</sub>,*pS*<sub>N3</sub>)- and ( $\lambda$ -*pS*<sub>N1</sub>,*pR*<sub>N3</sub>)-**12** isomers

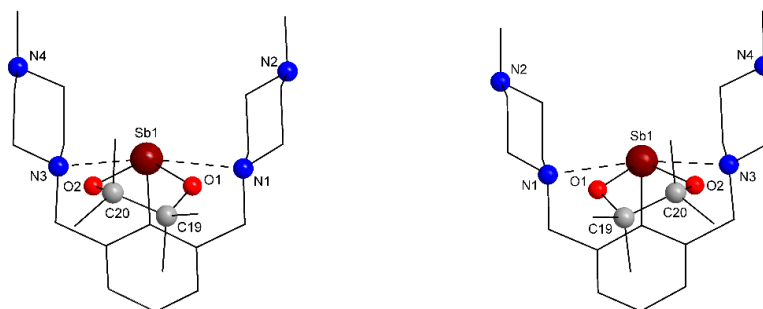

**Figure S51.** Molecular structure of isomers ( $\delta$ - $pR_{N1}, pS_{N3}$ )-**12** (left) and ( $\lambda$ - $pS_{N1}, pR_{N3}$ )-**12** (right) in the crystal of **12**.

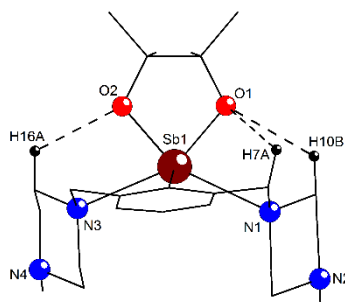

**Figure S52.** Molecular structure of **12**, showing the intramolecular O $\cdots$ H contacts (only hydrogen atoms involved in intramolecular contacts are shown).

- intramolecular distance
 

|                                           |        |                            |
|-------------------------------------------|--------|----------------------------|
| O(1) $\cdots$ H(7A) <sub>methylene</sub>  | 2.56 Å | $\sum r_{vdW}(O,H)$ 2.60 Å |
| O(1) $\cdots$ H(10B) <sub>methylene</sub> | 2.56 Å |                            |
| O(2) $\cdots$ H(16A) <sub>methylene</sub> | 2.51 Å |                            |

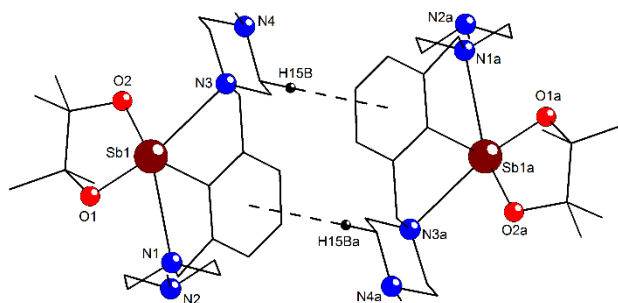

**Figure S53.** Dimer association between ( $\delta$ - $pR_{N1}, pS_{N3}$ )-**12** and ( $\lambda$ - $pS_{N1a}, pR_{N3a}$ )-**12** isomers based on C–H $\cdots$  $\pi$  ( $Ar_{\text{centroid}}$ ) contacts in the crystal of **12** (only hydrogen atoms involved in intermolecular contacts are shown) [symmetry equivalent atoms ( $2-x$ ,  $1-y$ ,  $1-z$ ) are given by “a”].

- intermolecular distance
 

|                                                                                  |                       |
|----------------------------------------------------------------------------------|-----------------------|
| C(15)–H(15B) <sub>methylene</sub> $\cdots$ $Ar_{\text{centroid}}\{C(1a)-C(6a)\}$ | 3.06 Å                |
|                                                                                  | $\gamma = 16.2^\circ$ |
- no further contacts between dimer associations.

**2,6-[MeN(CH<sub>2</sub>CH<sub>2</sub>)<sub>2</sub>NCH<sub>2</sub>]<sub>2</sub>C<sub>6</sub>H<sub>3</sub>]Bi(OCMe<sub>2</sub>)<sub>2</sub> (13)**

A reaction mixture of **2** (0.20 g, 0.34 mmol), pinacol (0.041 g, 0.34 mmol) and KOH (0.076 g, 1.36 mmol) in ethanol (25 mL) was stirred for 24 h at room temperature, then the solvent was removed *in vacuo* and the solid residue was extracted with Et<sub>2</sub>O. Evaporation of the solvent from the resulting clear solution yielded **13** as a colourless solid (0.19 g, 89%), m.p. 176 °C.

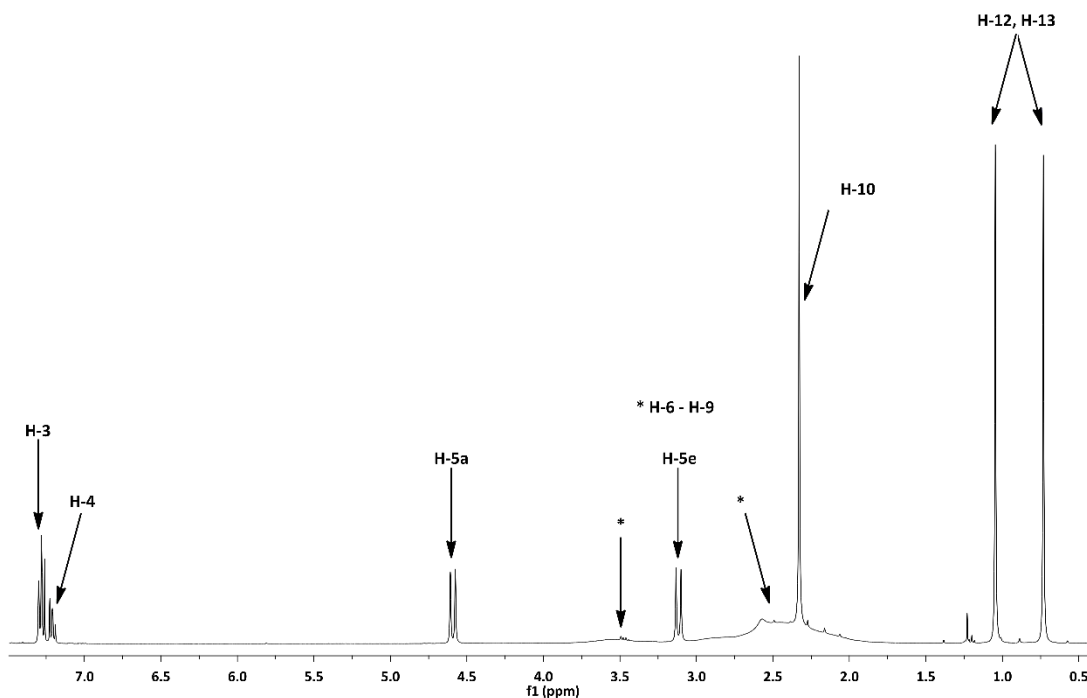

**Figure S54.** <sup>1</sup>H NMR (400 MHz, CDCl<sub>3</sub>) spectrum of compound **13**, at r.t.

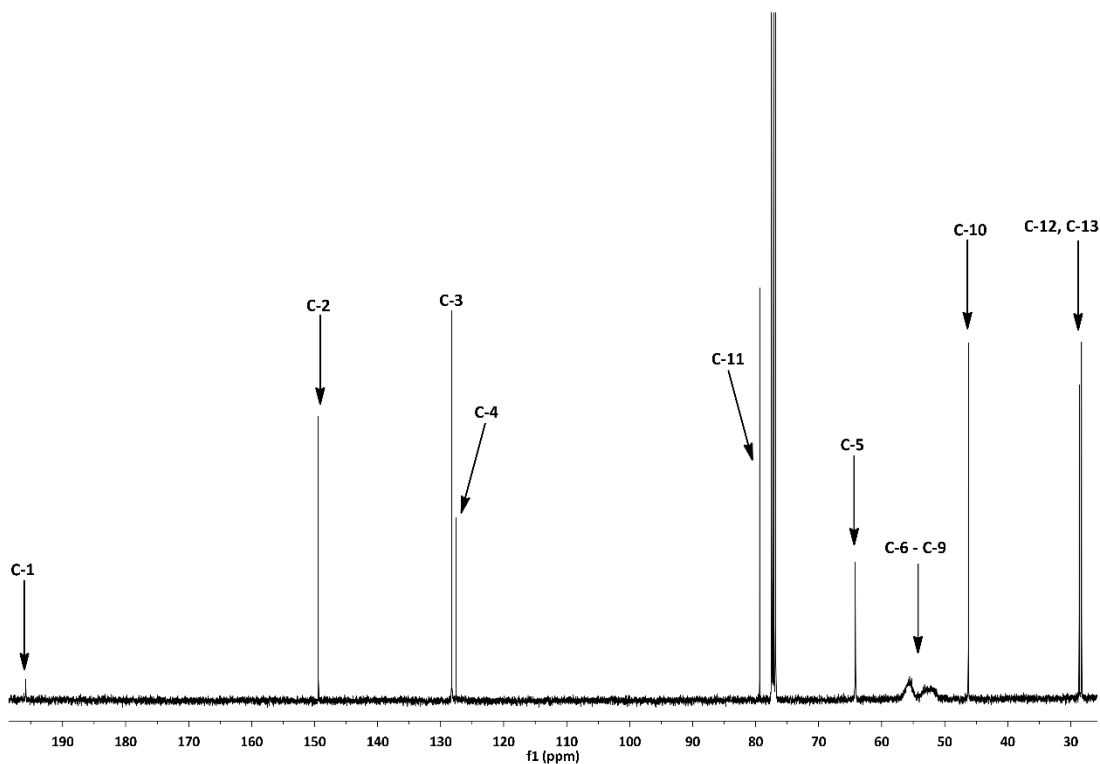

**Figure S55.** <sup>13</sup>C NMR (101 MHz, CDCl<sub>3</sub>) spectrum of compound **13**, at r.t.

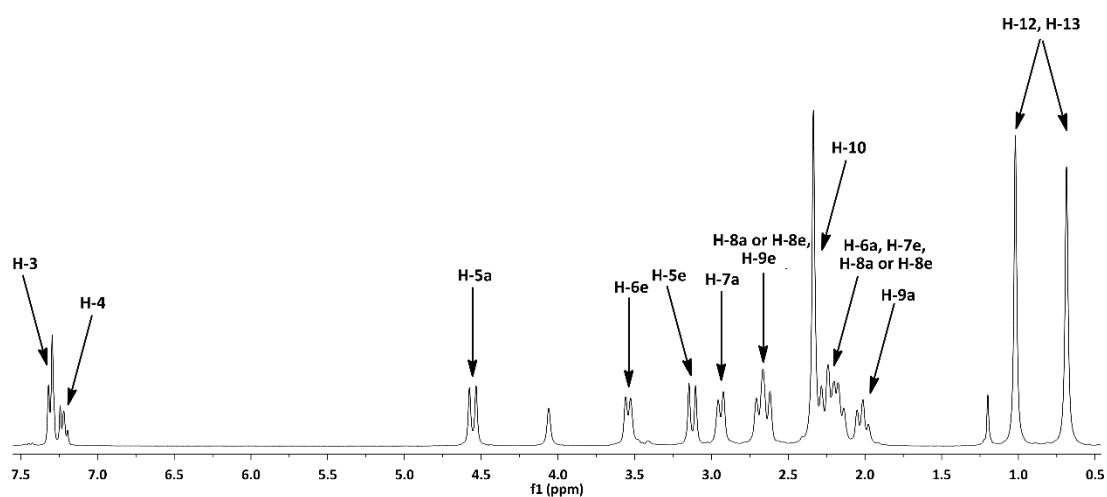

**Figure S56.**  $^1\text{H}$  NMR (301 MHz,  $\text{CDCl}_3$ ) spectrum of compound **13**, at  $-40\text{ }^\circ\text{C}$ .

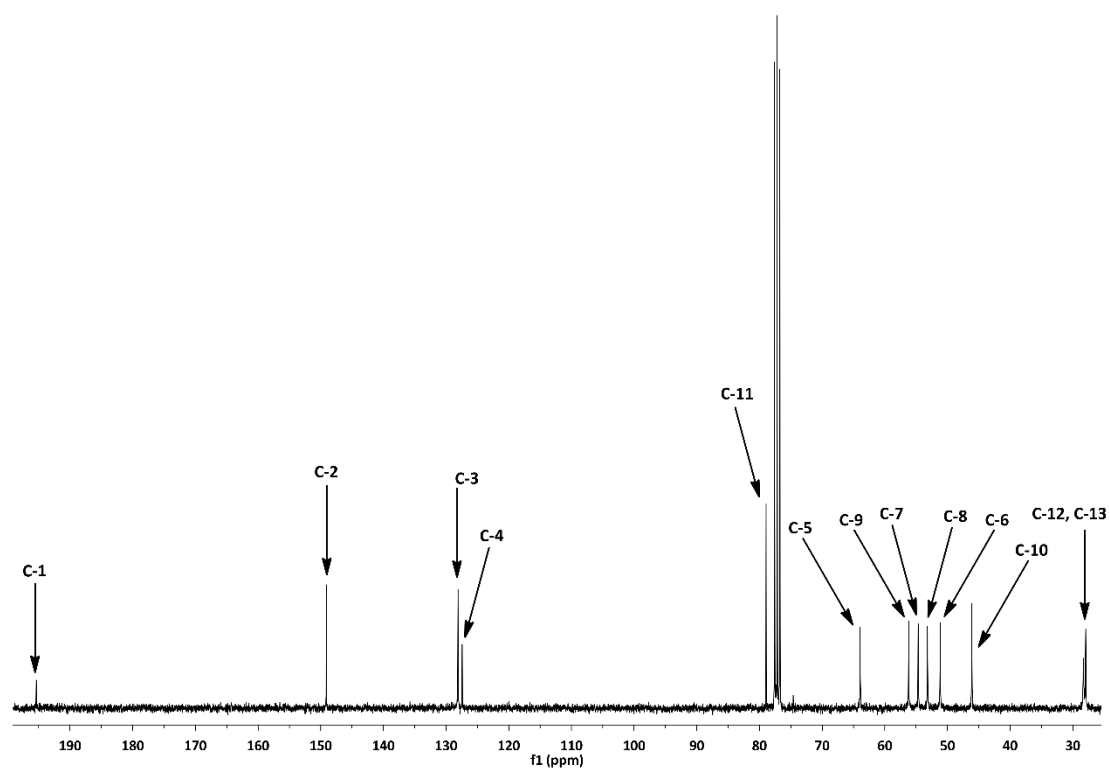

**Figure S57.**  $^{13}\text{C}$  NMR (76 MHz,  $\text{CDCl}_3$ ) spectrum of compound **13**, at  $-40\text{ }^\circ\text{C}$ .

[2,6-{MeN(CH<sub>2</sub>CH<sub>2</sub>)<sub>2</sub>NCH<sub>2</sub>}<sub>2</sub>C<sub>6</sub>H<sub>3</sub>]Sb(O<sub>2</sub>-1,2-C<sub>6</sub>H<sub>4</sub>) (**14**)

KOH (0.03 g, 0.54 mmol) was added over a solution of **1** (0.13 g, 0.27 mmol) and catechol (0.03 g, 0.27 mmol) in ethanol (30 mL). The reaction mixture was stirred for 3 h at room temperature, then the solvent was removed *in vacuo*. The remaining solid was solved in CHCl<sub>3</sub>, the colourless solution was dried over anh. Na<sub>2</sub>SO<sub>4</sub>, then filtered through a glass frit. The solvent was removed from the clear solution and the remaining yellow solid was extracted with Et<sub>2</sub>O (2x15 mL) and filtered again. Evaporation of the solvent gave **14** as a colourless crystalline solid (0.11 g, 79%), m.p. 225-230 °C.

<sup>1</sup>H NMR (301 MHz, CDCl<sub>3</sub>, 333 K): δ 2.30-2.80 [m, 22H, overlapped resonances for H-6 – H-9 with H-10 (δ 2.37 ppm, s)], AB spin system with A at δ 3.10 ppm (<sup>2</sup>J<sub>H-5a,H-5e</sub> = 13.5 Hz, 2H, H-5e) and B at δ 4.55 ppm (<sup>2</sup>J<sub>H-5a,H-5e</sub> = 13.5 Hz, 2H, H-5a), 6.38-6.48 (m, AA'BB' spin system, 2H, H-13), 6.56-6.66 (m, AA'BB' spin system, 2H, H-12), AB<sub>2</sub> spin system with B at δ 7.01 ppm (d, <sup>3</sup>J<sub>H-3,H-4</sub> = 7.3 Hz, 2H, H-3) and A at δ 7.12 ppm (t, <sup>3</sup>J<sub>H-3,H-4</sub> = 7.3 Hz, 1H, H-4).

<sup>13</sup>C{<sup>1</sup>H} NMR (76 MHz, CDCl<sub>3</sub>, 333 K): δ 46.15 (C-10), 52.63 (C-8 and C-6), 54.57 (C-9 and C-7), 62.49 (C-5), 114.20 (C-12), 117.74 (C-13), 126.35 (C-3), 129.70 (C-4), 146.09 (C-2), 150.57 (C-1), 153.13 (C-11).

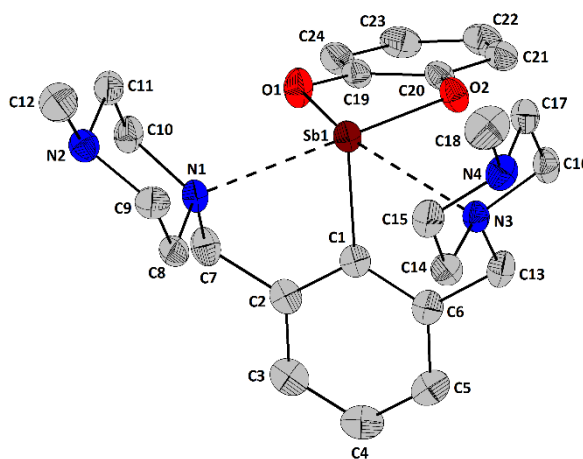

**Figure S58.** Molecular structure of the isomer (*pR*<sub>N1</sub>,*pS*<sub>N3</sub>)-**14**. Thermal ellipsoids are drawn at the 25% probability. Hydrogen atoms are omitted for clarity.

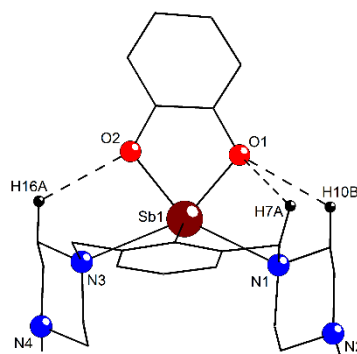

**Figure S59.** Molecular structure of **14**, showing the intramolecular O···H contacts (only hydrogen atoms involved in intramolecular contacts are shown).

|                           |                                    |        |                            |
|---------------------------|------------------------------------|--------|----------------------------|
| - intramolecular distance | O(1)···H(7A) <sub>methylene</sub>  | 2.50 Å | $\sum r_{vdw}(O,H)$ 2.60 Å |
|                           | O(1)···H(12B) <sub>methylene</sub> | 2.53 Å |                            |
|                           | O(2)···H(16A) <sub>methylene</sub> | 2.58 Å |                            |



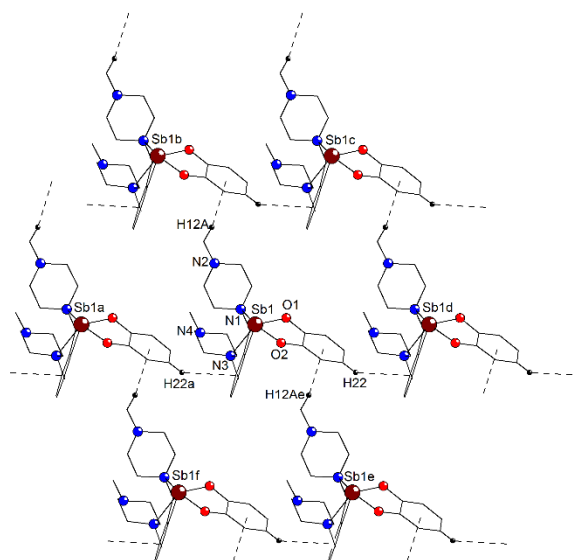

**Figure S60.** View along  $c$  axis of the honeycomb arrangement of the molecules in a fragment of the layer based on  $C-H\cdots\pi$  ( $Ar_{\text{centroid}}$ ) contacts in the crystal of **14** (only hydrogen atoms involved in intermolecular contacts are shown) [symmetry equivalent atoms  $(-I+x, y, z)$ ,  $(-I+x, I+y, z)$ ,  $(x, I+y, z)$ ,  $(I+x, y, z)$ ,  $(I+x, -I+y, z)$  and  $(x, -I+y, z)$  are given by “a”, “b”, “c”, “d”, “e” and “f”, respectively].

|   |                         |                                                                             |                       |
|---|-------------------------|-----------------------------------------------------------------------------|-----------------------|
| - | intermolecular distance | $C(12)-H(12A)_{\text{methyl}}\cdots Ar_{\text{centroid}}\{C(19b)-C(24b)\}$  | 2.89 Å                |
| - |                         |                                                                             | $\gamma = 12.6^\circ$ |
| - |                         | $C(22)\cdots H(22)_{\text{aryl}}\cdots Ar_{\text{centroid}}\{C(1d)-C(6d)\}$ | 3.03 Å                |
| - |                         |                                                                             | $\gamma = 14.8^\circ$ |

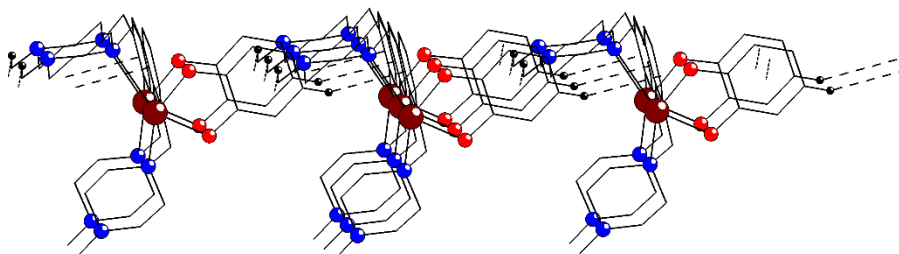

**Figure S61.** View along  $b$  axis of a fragment of the layer based on  $C-H\cdots\pi$  ( $Ar_{\text{centroid}}$ ) contacts in the crystal of **14** (only hydrogen atoms involved in intermolecular contacts are shown).

- no further contacts between parallel layers.

[2,6-{MeN(CH<sub>2</sub>CH<sub>2</sub>)<sub>2</sub>NCH<sub>2</sub>}<sub>2</sub>C<sub>6</sub>H<sub>3</sub>]Bi(O<sub>2</sub>-1,2-C<sub>6</sub>H<sub>4</sub>) (**15**)

A reaction mixture of **2** (0.20 g, 0.34 mmol), catechol (0.038 g, 0.34 mmol) and KOH (0.076 g, 1.36 mmol) in ethanol (25 mL) was stirred for 24 h at room temperature, then the solvent was removed *in vacuo* and the solid residue was extracted with Et<sub>2</sub>O. Evaporation of the solvent from the resulting clear solution yielded **15** as a yellow solid (0.07 g, 33%), m.p. 230 °C.

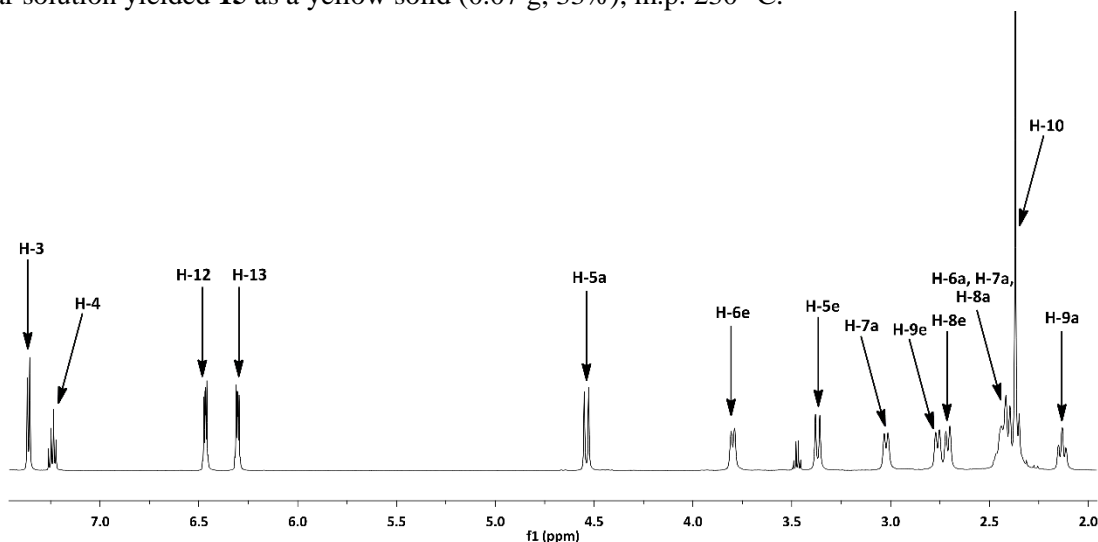

Figure S62. <sup>1</sup>H NMR (600 MHz, CDCl<sub>3</sub>) spectrum of compound **15**, at r.t.

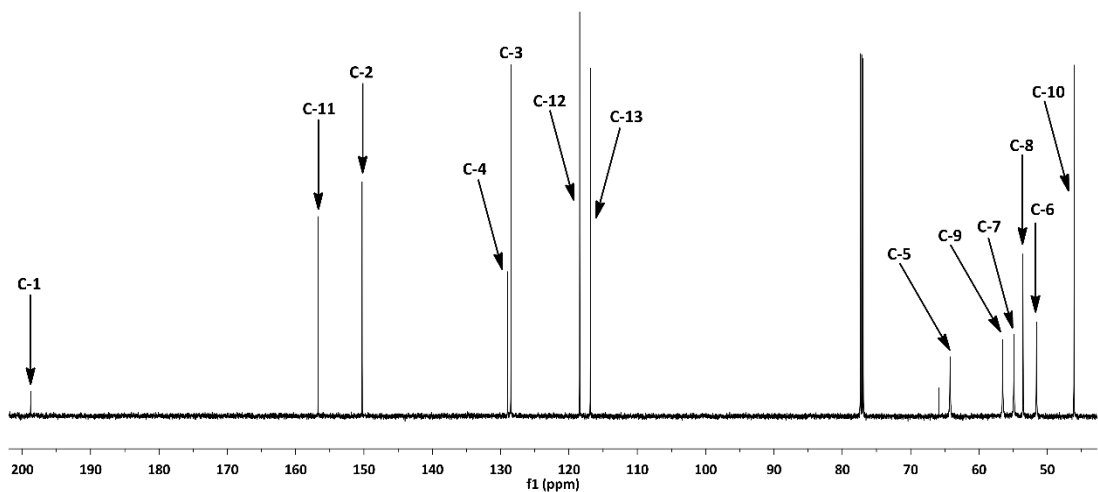

Figure S63. <sup>13</sup>C NMR (151 MHz, CDCl<sub>3</sub>) spectrum of compound **15**, at r.t.

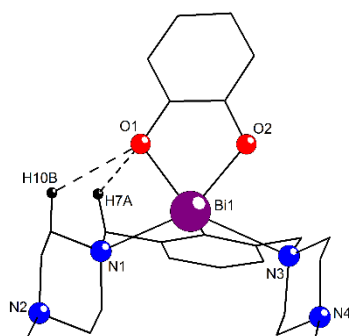

Figure S64. Molecular structure of **15**, showing the intramolecular O $\cdots$ H contacts (only hydrogen atoms involved in intramolecular contacts are shown).

|                           |                                           |        |                            |
|---------------------------|-------------------------------------------|--------|----------------------------|
| - intramolecular distance | O(1) $\cdots$ H(7A) <sub>methylene</sub>  | 2.52 Å | $\sum r_{vdw}(O,H)$ 2.60 Å |
|                           | O(1) $\cdots$ H(10B) <sub>methylene</sub> | 2.55 Å |                            |

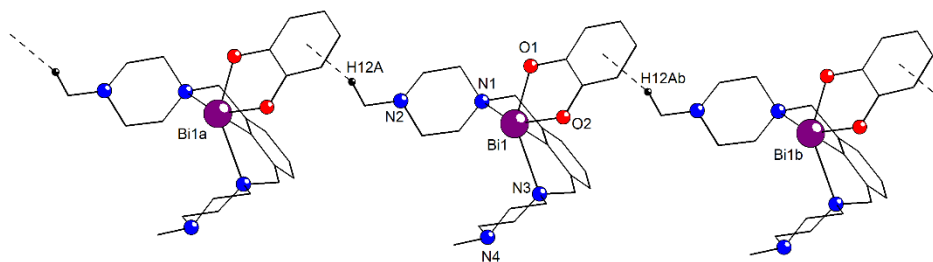

**Figure S65.** View of the chain polymer based on C–H··· $\pi$  ( $\text{Ar}_{\text{centroid}}$ ) contacts in the crystal of **15** (only hydrogen atoms involved in intermolecular contacts are shown) [symmetry equivalent atoms ( $-I+x, I+y, z$ ) and ( $I+x, -I+y, z$ ) are given by “a” and “b”, respectively].

- intermolecular distance  $\text{C}(12)\text{--H}(12\text{A})_{\text{methyl}}\cdots\text{Ar}_{\text{centroid}}\{\text{C}(19\text{a})\text{--C}(24\text{a})\}$  2.87 Å  
-  $\gamma = 11.1^\circ$
- no further contacts between parallel chains.

**Table S1.** Crystallographic data for compounds **1**, **3**, **4·4H<sub>2</sub>O** and **5·H<sub>2</sub>O·C<sub>6</sub>H<sub>5</sub>Me**

|                                         | <b>1</b>                                                          | <b>3</b>                                                                      | <b>4·4H<sub>2</sub>O</b>                                                      | <b>5·H<sub>2</sub>O·C<sub>6</sub>H<sub>5</sub>Me</b>                                         |
|-----------------------------------------|-------------------------------------------------------------------|-------------------------------------------------------------------------------|-------------------------------------------------------------------------------|----------------------------------------------------------------------------------------------|
| Empirical formula                       | C <sub>18</sub> H <sub>29</sub> Cl <sub>2</sub> N <sub>4</sub> Sb | C <sub>36</sub> H <sub>58</sub> N <sub>8</sub> O <sub>2</sub> Sb <sub>2</sub> | C <sub>36</sub> H <sub>66</sub> Bi <sub>2</sub> N <sub>8</sub> O <sub>6</sub> | C <sub>49</sub> H <sub>71</sub> F <sub>9</sub> N <sub>8</sub> O <sub>9</sub> Sb <sub>2</sub> |
| <i>M</i>                                | 494.10                                                            | 878.40                                                                        | 1124.92                                                                       | 1330.63                                                                                      |
| <i>T/K</i>                              | 293                                                               | 297                                                                           | 293                                                                           | 203                                                                                          |
| Crystal system                          | Triclinic                                                         | Triclinic                                                                     | Triclinic                                                                     | Monoclinic                                                                                   |
| Space group                             | <i>P</i> -1                                                       | <i>P</i> -1                                                                   | <i>P</i> -1                                                                   | <i>P</i> 2 <sub>1</sub> / <i>c</i>                                                           |
| <i>a</i> /Å                             | 10.5551(6)                                                        | 9.080(2)                                                                      | 11.146(6)                                                                     | 11.0460(11)                                                                                  |
| <i>b</i> /Å                             | 12.4385(7)                                                        | 10.126(3)                                                                     | 12.870(6)                                                                     | 28.780(3)                                                                                    |
| <i>c</i> /Å                             | 16.6000(9)                                                        | 11.752(3)                                                                     | 16.347(8)                                                                     | 18.4055(18)                                                                                  |
| <i>α</i> <sup>o</sup>                   | 87.275(4)                                                         | 68.806(4)                                                                     | 107.146(8)                                                                    | 90                                                                                           |
| <i>β</i> <sup>o</sup>                   | 75.794(4)                                                         | 82.572(4)                                                                     | 99.329(9)                                                                     | 95.829(2)                                                                                    |
| <i>γ</i> <sup>o</sup>                   | 86.572(4)                                                         | 83.749(4)                                                                     | 92.409(9)                                                                     | 90                                                                                           |
| <i>V</i> /Å <sup>3</sup>                | 2107.8(2)                                                         | 996.7(5)                                                                      | 2201.1(19)                                                                    | 5820.9(10)                                                                                   |
| <i>Z</i>                                | 4                                                                 | 1                                                                             | 2                                                                             | 4                                                                                            |
| No. of reflections collected            | 23396                                                             | 9896                                                                          | 21104                                                                         | 43470                                                                                        |
| No. of independent reflections          | 7820 (R <sub>int</sub> = 0.028)                                   | 3680 (R <sub>int</sub> = 0.051)                                               | 8093 (R <sub>int</sub> = 0.075)                                               | 10835 (R <sub>int</sub> = 0.093)                                                             |
| Absorption correction                   | Multi-Scan <sup>1</sup>                                           | Multi-Scan <sup>2</sup>                                                       | Multi-Scan <sup>2</sup>                                                       | Multi-Scan <sup>2</sup>                                                                      |
| <i>μ</i> (Mo Kα)/mm <sup>-1</sup>       | 1.571                                                             | 1.396                                                                         | 8.033                                                                         | 1.014                                                                                        |
| <i>R</i> 1 [ <i>I</i> > 2σ( <i>I</i> )] | 0.0202                                                            | 0.0487                                                                        | 0.0442                                                                        | 0.0568                                                                                       |
| <i>wR</i> 2                             | 0.0511                                                            | 0.1214                                                                        | 0.1276                                                                        | 0.1336                                                                                       |
| GOF on <i>F</i> <sup>2</sup>            | 1.05                                                              | 1.13                                                                          | 0.93                                                                          | 0.99                                                                                         |

<sup>1</sup> R. Blessing, *Acta Crystallogr., Sect. A: Fundam. Crystallogr.*, 1995, **51**, 33.

<sup>2</sup> G. M. Sheldrick, *SADABS, Program for area detector adsorption correction*, Institute for Inorganic Chemistry, University of Göttingen, Germany, 1996.

**Table S2.** Crystallographic data for compounds **8·H<sub>2</sub>O**, **10·2H<sub>2</sub>O** and **11·2H<sub>2</sub>O**

|                                         | <b>8·H<sub>2</sub>O</b>                                          | <b>10·2H<sub>2</sub>O</b>                                        | <b>11·2H<sub>2</sub>O</b>                                                     |
|-----------------------------------------|------------------------------------------------------------------|------------------------------------------------------------------|-------------------------------------------------------------------------------|
| Empirical formula                       | C <sub>20</sub> H <sub>29</sub> N <sub>4</sub> O <sub>4</sub> Sb | C <sub>20</sub> H <sub>33</sub> N <sub>4</sub> O <sub>2</sub> Sb | C <sub>20</sub> H <sub>37</sub> Bi <sub>2</sub> N <sub>4</sub> O <sub>4</sub> |
| <i>M</i>                                | 529.24                                                           | 519.28                                                           | 606.51                                                                        |
| <i>T/K</i>                              | 297                                                              | 293                                                              | 294                                                                           |
| Crystal system                          | Monoclinic                                                       | Monoclinic                                                       | Monoclinic                                                                    |
| Space group                             | <i>P</i> 2 <sub>1</sub> / <i>c</i>                               | <i>P</i> 2 <sub>1</sub> / <i>n</i>                               | <i>P</i> 2 <sub>1</sub> / <i>n</i>                                            |
| <i>a</i> /Å                             | 9.0558(19)                                                       | 12.626(3)                                                        | 12.6247(9)                                                                    |
| <i>b</i> /Å                             | 17.283(4)                                                        | 12.291(3)                                                        | 12.1795(9)                                                                    |
| <i>c</i> /Å                             | 16.433(3)                                                        | 15.792(3)                                                        | 15.7589(11)                                                                   |
| <i>α</i> <sup>o</sup>                   | 90.00                                                            | 90.00                                                            | 90.00                                                                         |
| <i>β</i> <sup>o</sup>                   | 105.629(4)                                                       | 99.53(3)                                                         | 99.415(1)                                                                     |
| <i>γ</i> <sup>o</sup>                   | 90.00                                                            | 90.00                                                            | 90.00                                                                         |
| <i>V</i> /Å <sup>3</sup>                | 2476.9(9)                                                        | 2416.9(10)                                                       | 2390.5(3)                                                                     |
| <i>Z</i>                                | 4                                                                | 4                                                                | 4                                                                             |
| No. of reflections collected            | 23884                                                            | 23681                                                            | 23158                                                                         |
| No. of independent reflections          | 4590 (R <sub>int</sub> = 0.076)                                  | 4502 (R <sub>int</sub> = 0.205)                                  | 4445 (R <sub>int</sub> = 0.059)                                               |
| Absorption correction                   | Multi-Scan <sup>2</sup>                                          | Multi-Scan <sup>2</sup>                                          | Multi-Scan <sup>2</sup>                                                       |
| <i>μ</i> (Mo Kα)/mm <sup>-1</sup>       | 1.148                                                            | 1.172                                                            | 7.406                                                                         |
| <i>R</i> 1 [ <i>I</i> > 2σ( <i>I</i> )] | 0.0426                                                           | 0.1086                                                           | 0.0318                                                                        |
| <i>wR</i> 2                             | 0.0973                                                           | 0.2261                                                           | 0.0723                                                                        |
| GOF on <i>F</i> <sup>2</sup>            | 1.05                                                             | 1.19                                                             | 1.07                                                                          |

<sup>2</sup> G. M. Sheldrick, *SADABS, Program for area detector adsorption correction*, Institute for Inorganic Chemistry, University of Göttingen, Germany, 1996.

**Table S3.** Crystallographic data for compounds **12**, **14** and **15**

|                                         | <b>12</b>                                                                     | <b>14</b>                                                        | <b>15</b>                                                       |
|-----------------------------------------|-------------------------------------------------------------------------------|------------------------------------------------------------------|-----------------------------------------------------------------|
| Empirical formula                       | C <sub>24</sub> H <sub>41</sub> N <sub>4</sub> O <sub>2</sub> Sb <sub>1</sub> | C <sub>24</sub> H <sub>33</sub> N <sub>4</sub> O <sub>2</sub> Sb | C <sub>24</sub> H <sub>33</sub> BiN <sub>4</sub> O <sub>2</sub> |
| <i>M</i>                                | 539.36                                                                        | 531.29                                                           | 618.52                                                          |
| <i>T/K</i>                              | 297                                                                           | 295                                                              | 295                                                             |
| Crystal system                          | Monoclinic                                                                    | Triclinic                                                        | Triclinic                                                       |
| Space group                             | <i>P</i> 2 <sub>1</sub> / <i>c</i>                                            | <i>P</i> -1                                                      | <i>P</i> -1                                                     |
| <i>a</i> /Å                             | 11.188(9)                                                                     | 9.7365(11)                                                       | 9.8126(9)                                                       |
| <i>b</i> /Å                             | 11.022(9)                                                                     | 10.1979(11)                                                      | 10.1505(9)                                                      |
| <i>c</i> /Å                             | 21.870(18)                                                                    | 15.6619(18)                                                      | 15.7304(14)                                                     |
| <i>α</i> <sup>o</sup>                   | 90                                                                            | 81.563(2)                                                        | 82.242(2)                                                       |
| <i>β</i> <sup>o</sup>                   | 93.335(15)                                                                    | 76.977(2)                                                        | 77.035(2)                                                       |
| <i>γ</i> <sup>o</sup>                   | 90                                                                            | 64.391(2)                                                        | 64.012(1)                                                       |
| <i>V</i> /Å <sup>3</sup>                | 2692(4)                                                                       | 1364.1(3)                                                        | 1371.3(2)                                                       |
| <i>Z</i>                                | 4                                                                             | 2                                                                | 2                                                               |
| No. of reflections collected            | 24813                                                                         | 13491                                                            | 13523                                                           |
| No. of independent reflections          | 4980 ( <i>R</i> <sub>int</sub> = 0.096)                                       | 5028 ( <i>R</i> <sub>int</sub> = 0.041)                          | 5064 ( <i>R</i> <sub>int</sub> = 0.043)                         |
| Absorption correction                   | Multi-Scan <sup>2</sup>                                                       | Multi-Scan <sup>2</sup>                                          | Multi-Scan <sup>2</sup>                                         |
| <i>μ</i> (Mo Kα)/mm <sup>-1</sup>       | 1.050                                                                         | 1.035                                                            | 6.452                                                           |
| <i>R</i> 1 [ <i>I</i> > 2σ( <i>I</i> )] | 0.0522                                                                        | 0.0375                                                           | 0.0329                                                          |
| <i>wR</i> 2                             | 0.1041                                                                        | 0.0896                                                           | 0.0742                                                          |
| GOF on <i>F</i> <sup>2</sup>            | 1.01                                                                          | 1.06                                                             | 1.01                                                            |

<sup>2</sup> G. M. Sheldrick, *SADABS, Program for area detector adsorption correction*, Institute for Inorganic Chemistry, University of Göttingen, Germany, 1996.

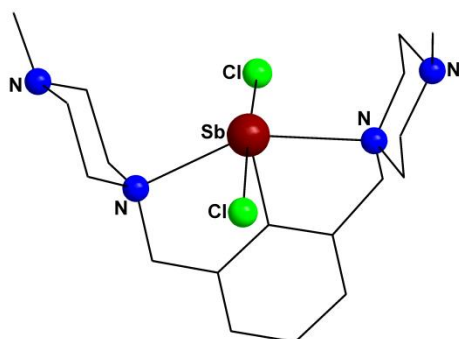

**Figure S66.** DFT calculated molecular structure of **1**. Hydrogen atoms were omitted for clarity.

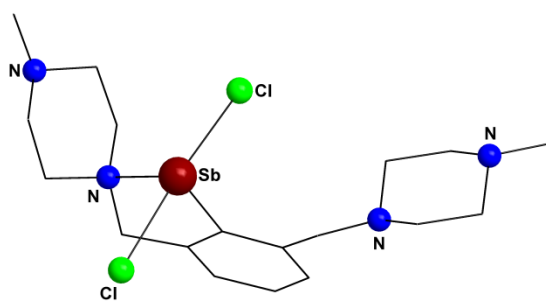

**Figure S67.** DFT calculated molecular structure of **1**, one arm uncoordinated. Hydrogen atoms were omitted for clarity.

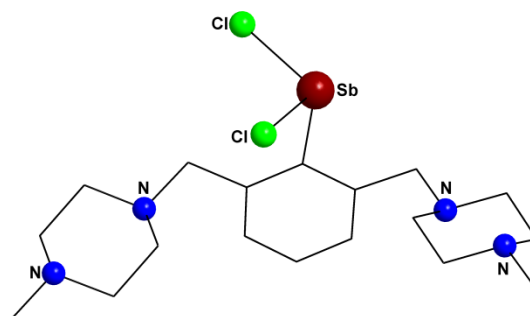

**Figure S68.** DFT calculated molecular structure of **1**, two arms uncoordinated. Hydrogen atoms were omitted for clarity.

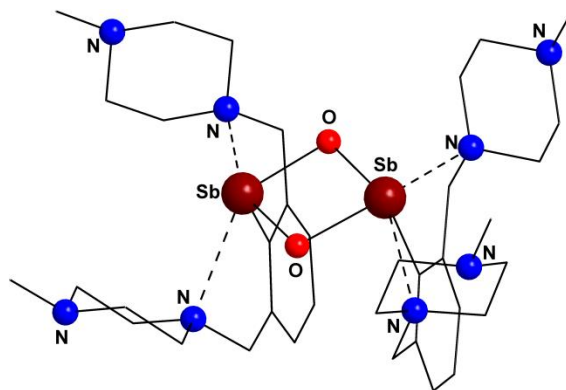

**Figure S69.** DFT calculated molecular structure of the *syn* isomer of **3**. Hydrogen atoms were omitted for clarity.

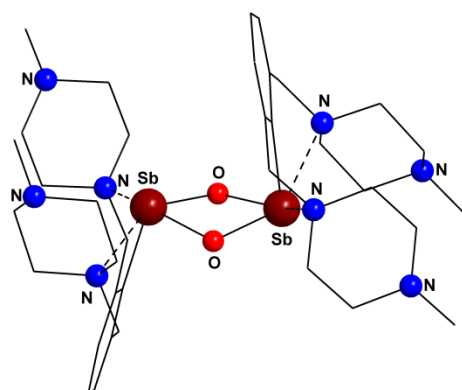

**Figure S70.** DFT calculated molecular structure of the *anti* isomer of **3**. Hydrogen atoms were omitted for clarity.

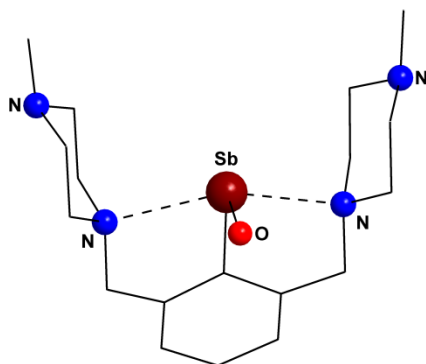

**Figure S71.** DFT calculated molecular structure of RSbO - the monomer of **3**. Hydrogen atoms were omitted for clarity.

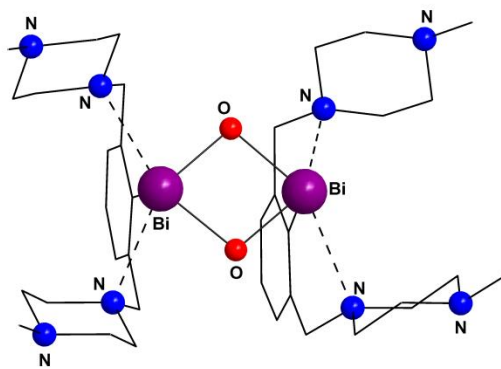

**Figure S72.** DFT calculated molecular structure of the *syn* isomer of **4**. Hydrogen atoms were omitted for clarity.

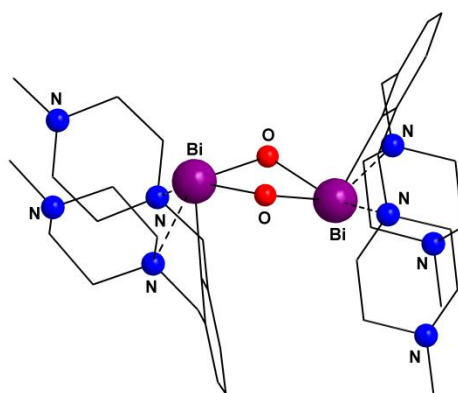

**Figure S73.** DFT calculated molecular structure of the *syn* isomer of **4**. Hydrogen atoms were omitted for clarity.

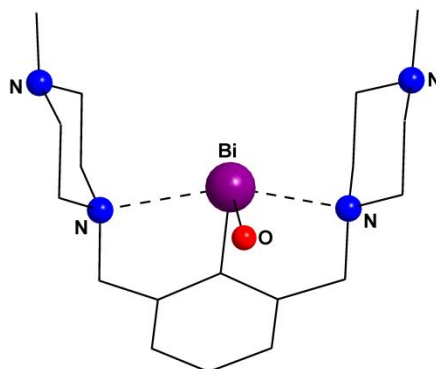

**Figure S74.** DFT calculated molecular structure of RBiO - the monomer of **4**. Hydrogen atoms were omitted for clarity.



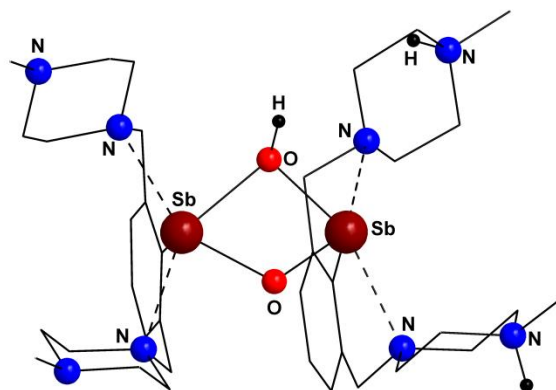

**Figure S75.** DFT calculated molecular structure of the cation of **5** (protons on the same pincer ligand). Hydrogen atoms were omitted for clarity.

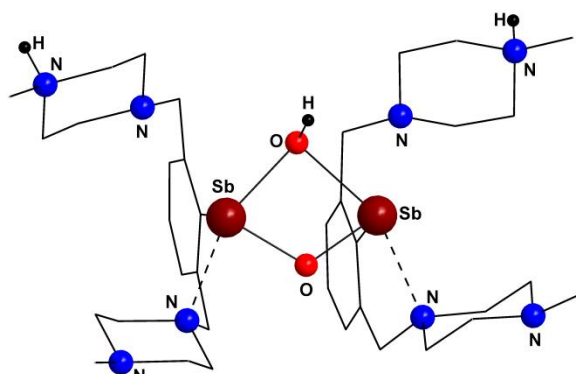

**Figure S76.** DFT calculated molecular structure of the cation of **5** (protons on different pincer ligands). Hydrogen atoms were omitted for clarity.

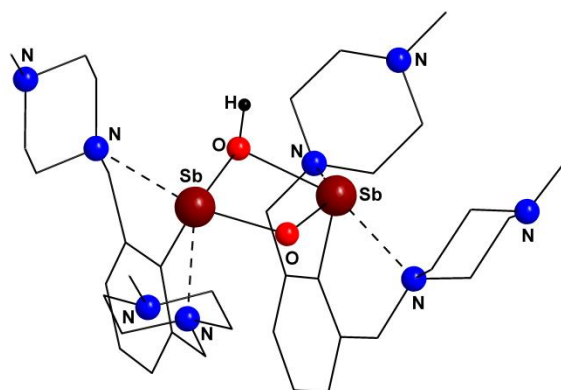

**Figure S77.** DFT calculated molecular structure of the cation  $[(\text{RSb})_2(\mu\text{-O})(\mu\text{-OH})]^+$ , *syn* isomer. Hydrogen atoms were omitted for clarity.

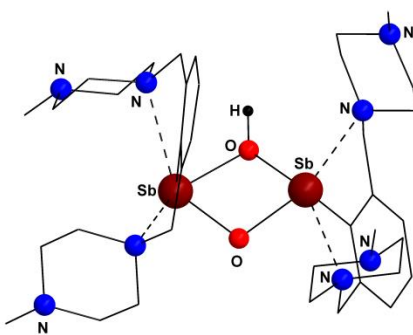

**Figure S78.** DFT calculated molecular structure of the cation  $[(RSb)_2(\mu-O)(\mu-OH)]^+$ , *anti* isomer. Hydrogen atoms were omitted for clarity.

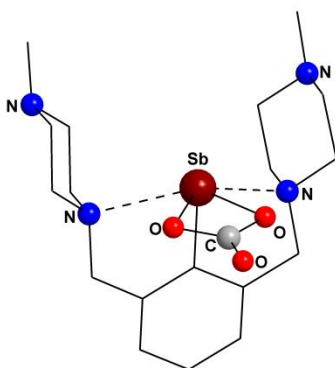

**Figure S79.** DFT calculated molecular structure of the mononuclear form of **6**. Hydrogen atoms were omitted for clarity.

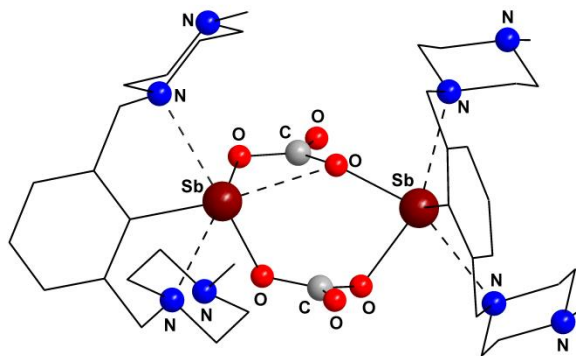

**Figure S80.** DFT calculated molecular structure of dimers of **6**, *syn* isomer. Hydrogen atoms were omitted for clarity.

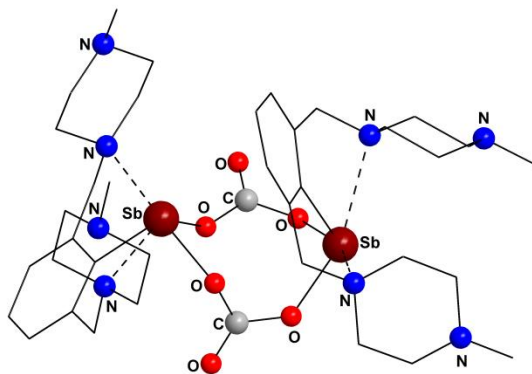

**Figure S81.** DFT calculated molecular structure of dimers of **6**, *anti* isomer. Hydrogen atoms were omitted for clarity.

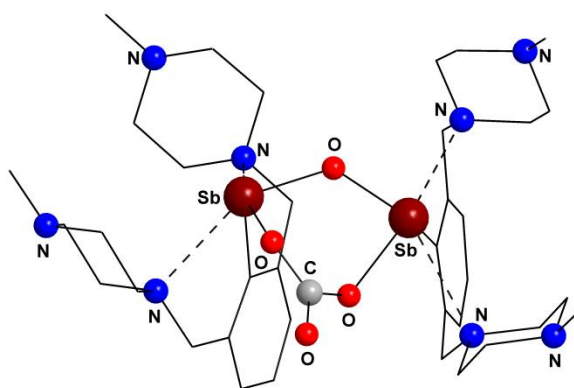

**Figure S82.** DFT calculated molecular structure of  $(\text{RSb})_2(\mu\text{-O})(\mu\text{-CO}_3)$ , *syn* isomer. Hydrogen atoms were omitted for clarity.

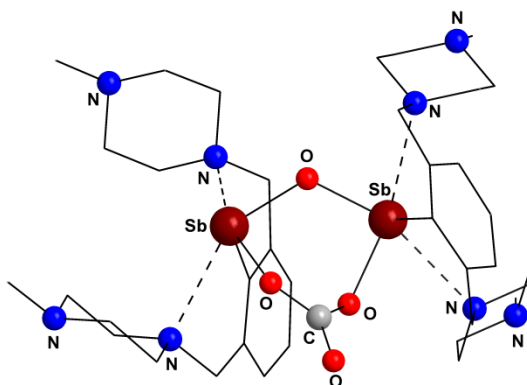

**Figure S83.** DFT calculated molecular structure of  $(\text{RSb})_2(\mu\text{-O})(\mu\text{-CO}_3)$ , *anti* isomer. Hydrogen atoms were omitted for clarity.

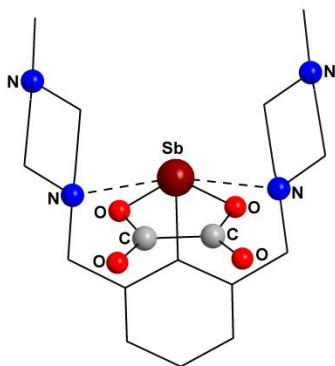

**Figure S84.** DFT calculated molecular structure of **8**. Hydrogen atoms were omitted for clarity.

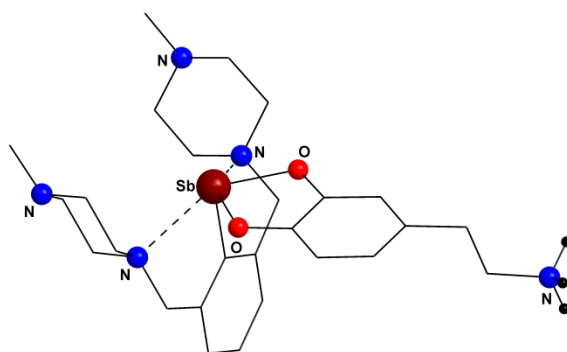

**Figure S85.** DFT calculated molecular structure of the cation of **9**. Hydrogen atoms were omitted for clarity.

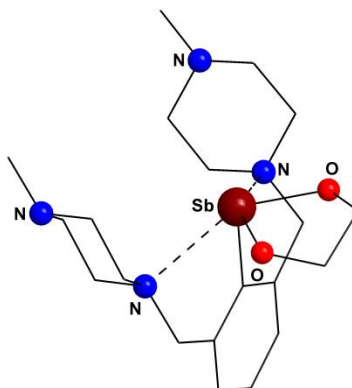

**Figure S86.** DFT calculated molecular structure of **10**. Hydrogen atoms were omitted for clarity.

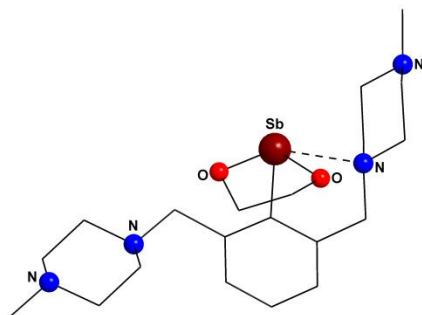

**Figure S87.** DFT calculated molecular structure of **10**, one arm uncoordinated. Hydrogen atoms were omitted for clarity.

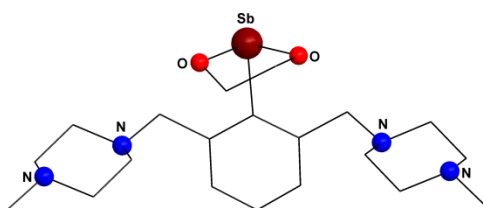

**Figure S88.** DFT calculated molecular structure of **10**, two arms uncoordinated. Hydrogen atoms were omitted for clarity.

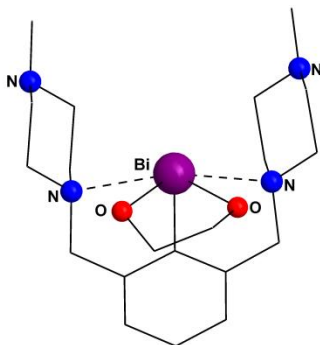

**Figure S89.** DFT calculated molecular structure of **11**. Hydrogen atoms were omitted for clarity.

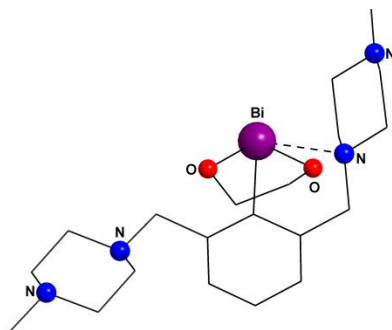

**Figure S90.** DFT calculated molecular structure of **11**, one arm uncoordinated. Hydrogen atoms were omitted for clarity.

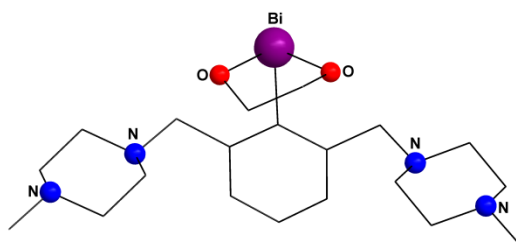

**Figure S91.** DFT calculated molecular structure of **11**, two arm uncoordinated. Hydrogen atoms were omitted for clarity.

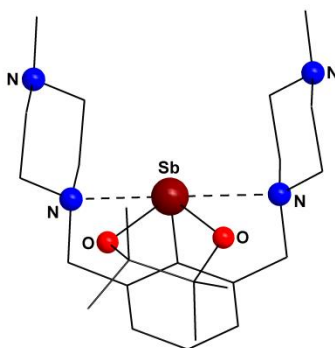

**Figure S92.** DFT calculated molecular structure of **12**. Hydrogen atoms were omitted for clarity.

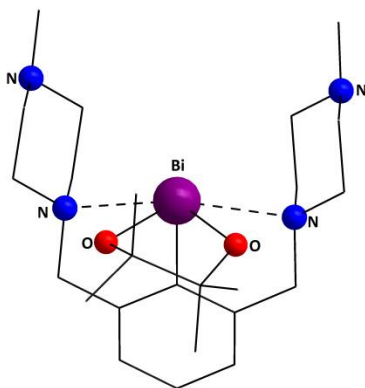

**Figure S93.** DFT calculated molecular structure of **13**.  
Hydrogen atoms were omitted for clarity.

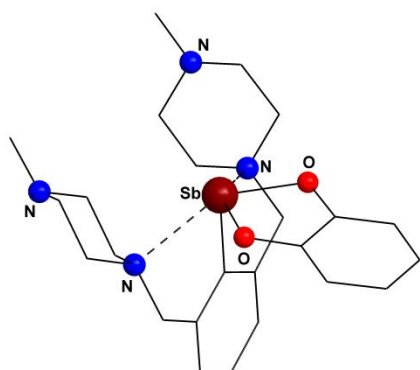

**Figure S94.** DFT calculated molecular structure of **14**.  
Hydrogen atoms were omitted for clarity.

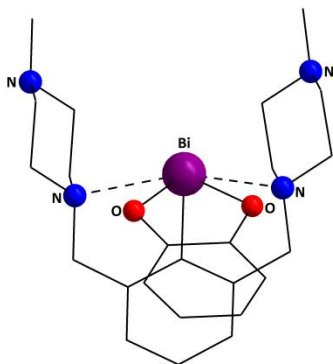

**Figure S95.** DFT calculated molecular structure of **15**.  
Hydrogen atoms were omitted for clarity.

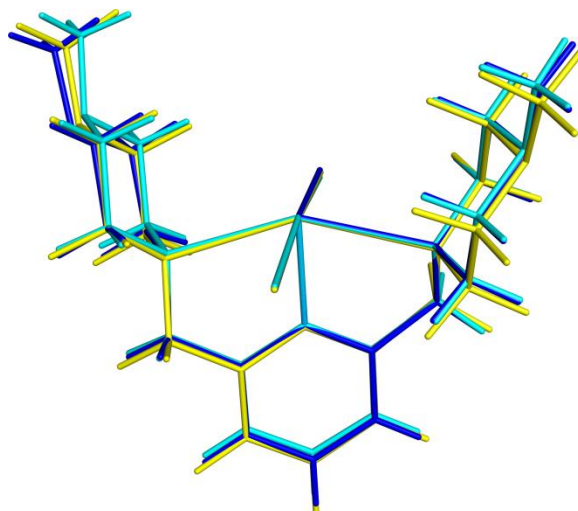

**Figure S96.** Overlapped capped-sticks representation of the DFT calculated (yellow) and crystallographically determined (blue and cyan) structures of **1**.

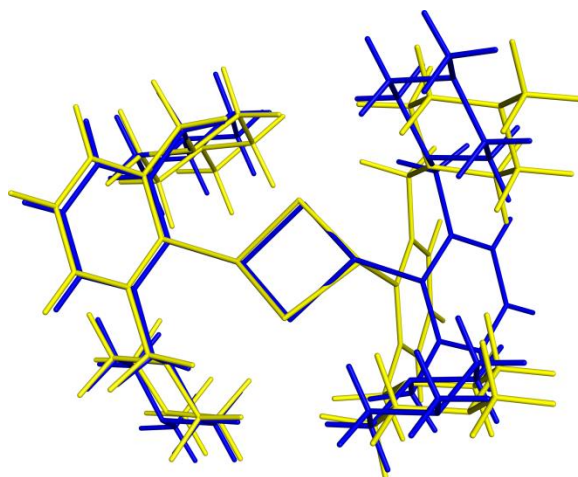

**Figure S97.** Overlapped capped-sticks representation of the DFT calculated (yellow) and crystallographically determined (blue) structures of the *anti* isomer of **3**.

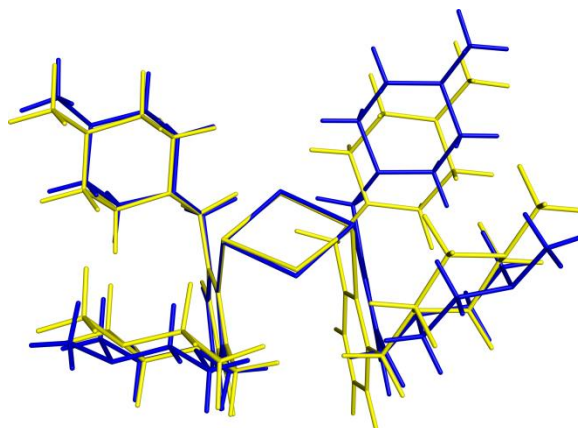

**Figure S98.** Overlapped capped-sticks representation of the DFT calculated (yellow) and crystallographically determined (blue) structures of the *syn* isomer of **4**.



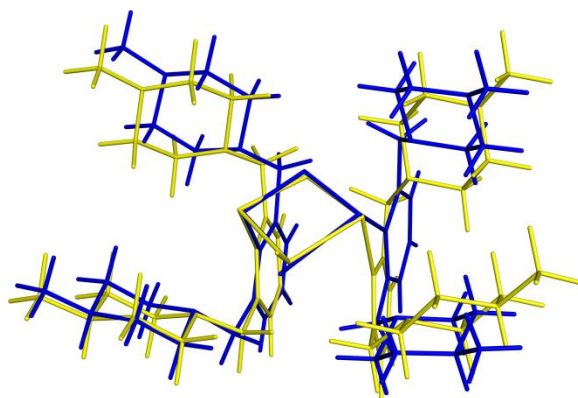

**Figure S99.** Overlapped capped-sticks representation of the DFT calculated (yellow) and crystallographically determined (blue) structures of the cation of **5**, *syn* isomer.

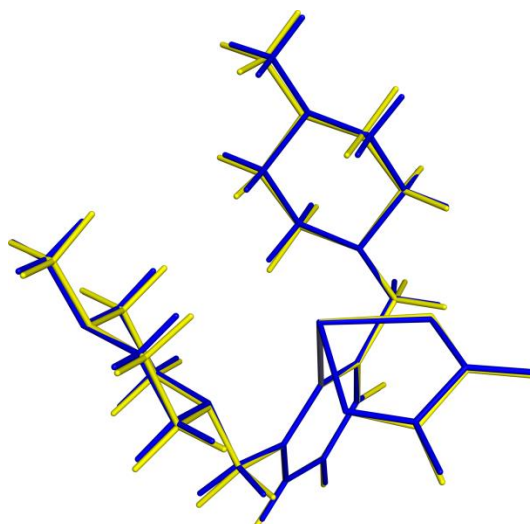

**Figure S100.** Overlapped capped-sticks representation of the DFT calculated (yellow) and crystallographically determined (blue) structures of **8**.

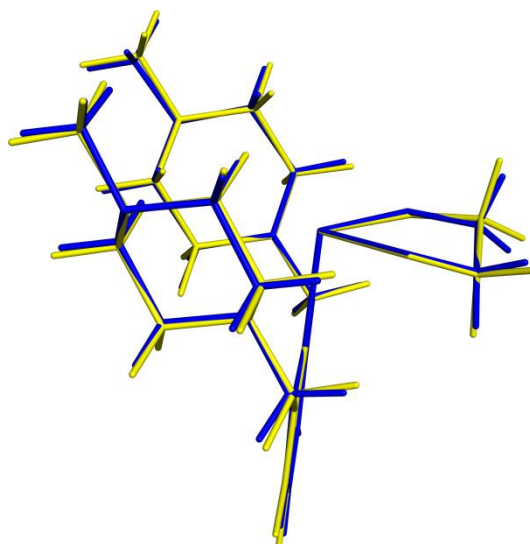

**Figure S101.** Overlapped capped-sticks representation of the DFT calculated (yellow) and crystallographically determined (blue) structures of **10**.

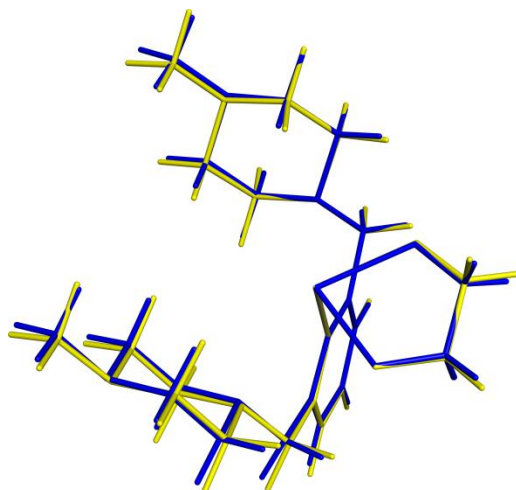

**Figure S102.** Overlapped capped-sticks representation of the DFT calculated (yellow) and crystallographically determined (blue) structures of **11**.

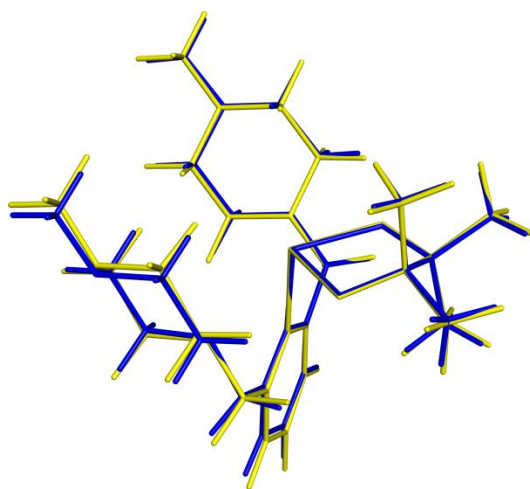

**Figure S103.** Overlapped capped-sticks representation of the DFT calculated (yellow) and crystallographically determined (blue) structures of **12**.

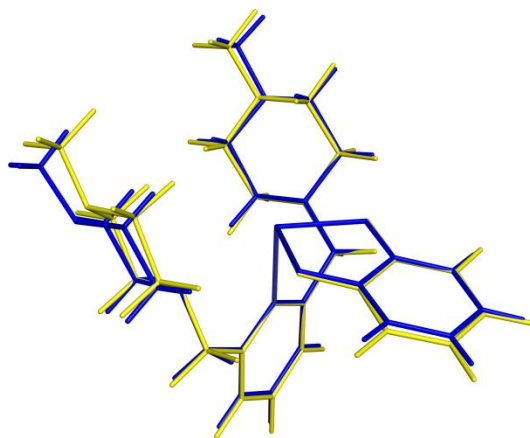

**Figure S104.** Overlapped capped-sticks representation of the DFT calculated (yellow) and crystallographically determined (blue) structures of **14**.

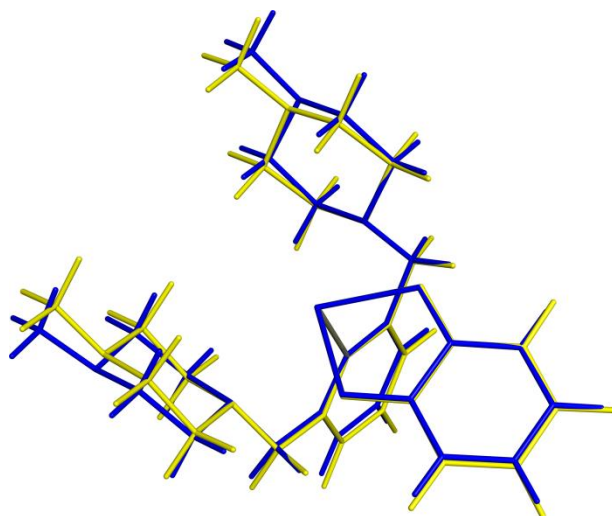

**Figure S105.** Overlapped capped-sticks representation of the DFT calculated (yellow) and crystallographically determined (blue) structures of **15**.

**Table S4.** Cartesian coordinates (Å) of **1**.

54

Coordinates from ORCA-job SbCl2\_opt

|   |                   |                   |                   |
|---|-------------------|-------------------|-------------------|
| C | 0.00259405110843  | -0.00618174206268 | -2.08812400433476 |
| C | -0.41977623800874 | 1.14510250852433  | -2.77146527986428 |
| C | -0.37602830626906 | 1.16598040447099  | -4.17746382528657 |
| H | -0.69507324383982 | 2.06355407898399  | -4.72368867675337 |
| C | 0.05897609559313  | 0.02970531027773  | -4.88140734752142 |
| H | 0.08110205461197  | 0.04377016030317  | -5.97783545501682 |
| C | 0.46589069057915  | -1.12445171973945 | -4.18987685448568 |
| H | 0.80729025279827  | -2.00783399649564 | -4.74564270422287 |
| C | 0.45289293899741  | -1.13971045939091 | -2.78317875873765 |
| C | -0.99537873993124 | 2.27864383211340  | -1.95778745584864 |
| H | -0.92516348721695 | 3.24835377292308  | -2.49267543199963 |
| H | -2.06445275134307 | 2.05986099071238  | -1.77504567315701 |
| C | -1.24069589739906 | 3.11401569309661  | 0.31633041211567  |
| H | -2.16780771571498 | 2.52211141821640  | 0.41705274660574  |
| H | -1.48844868157531 | 4.10722667612206  | -0.11391348418971 |
| C | -0.57275606771711 | 3.30179030365807  | 1.67058413358736  |
| H | -1.25346629207266 | 3.87345673805435  | 2.32757017124624  |
| H | -0.41972656275621 | 2.30002618873158  | 2.15021743114246  |
| C | 0.97106953768750  | 3.06042794974425  | -0.72071420467512 |
| H | 0.83085699490278  | 4.03878743525440  | -1.22731854851146 |
| H | 1.63558102321792  | 2.43018075425276  | -1.33702034806787 |
| C | 1.58928962498672  | 3.27727415031498  | 0.65563335131829  |
| H | 1.86901957592747  | 2.29125766327260  | 1.09594363853965  |
| H | 2.52860765130750  | 3.84588373983012  | 0.52940120207261  |
| C | 1.29794915662685  | 4.31365645989694  | 2.81985208350208  |
| H | 2.22231648089867  | 4.89967842974302  | 2.67289081334130  |
| H | 1.56246537720279  | 3.38994877406404  | 3.38972547940757  |
| H | 0.60608860936519  | 4.91311937378079  | 3.43792013791733  |
| C | 0.99623884836703  | -2.29404969525921 | -1.97656131143033 |
| H | 0.94825803069035  | -3.24948696720817 | -2.53891583659901 |
| H | 2.05711934426954  | -2.08045520856183 | -1.74603262216734 |
| C | -1.01697720993751 | -3.10706846035141 | -0.83776088797920 |
| H | -0.85647285493604 | -4.07412252307286 | -1.35988017350869 |
| H | -1.65660777254694 | -2.46281808390870 | -1.46578149899169 |
| C | -1.68891995295215 | -3.35347360054801 | 0.50810066120975  |
| H | -1.98400418280031 | -2.37669734152070 | 0.95885978711962  |
| H | -2.62365063440149 | -3.91657698736729 | 0.33272392542942  |
| C | 1.15183044501941  | -3.18809930493386 | 0.28294003603268  |
| H | 2.07500887375757  | -2.60072156989617 | 0.43351876894762  |
| H | 1.41451446664103  | -4.17102656501428 | -0.16189324052660 |
| C | 0.43246619931228  | -3.40724730618236 | 1.60583879437384  |
| H | 1.08640761042397  | -3.99735865814330 | 2.27366472391654  |
| H | 0.26466292995055  | -2.41702187888685 | 2.10417629577710  |
| C | -1.48406712229935 | -4.43824297611625 | 2.65843360213400  |
| H | -0.81794588356376 | -5.05317736205395 | 3.28943721237645  |
| H | -2.40315426592055 | -5.01822008520353 | 2.46254712697053  |
| H | -1.76869373220341 | -3.52663981303483 | 3.23800842366836  |
| N | -0.35138461349616 | 2.38761531200898  | -0.62399108562888 |

|    |                   |                   |                   |
|----|-------------------|-------------------|-------------------|
| N  | 0.68479976539437  | 4.03012135056871  | 1.52802145061236  |
| N  | 0.29999470776224  | -2.43729069234281 | -0.67265138929254 |
| N  | -0.82051541152795 | -4.12778205665199 | 1.39810048600215  |
| Cl | -2.65134088176202 | -0.06066106723819 | -0.18858282459544 |
| Cl | 2.57464157804079  | -0.00131725912605 | -0.07650852710714 |
| Sb | -0.04213553524903 | -0.03369069360845 | 0.05194736113300  |

**Table S5.** Cartesian coordinates (Å) of **1**, one arm uncoordinated.

54

Coordinates from ORCA-job SbCl2\_un1\_opt

|   |                   |                   |                   |
|---|-------------------|-------------------|-------------------|
| C | -1.03762448551567 | -0.03378757031288 | -2.76605019728461 |
| C | -0.10803969582113 | 0.96501404714038  | -2.43488302152003 |
| C | 1.15531460525372  | 0.94897429496624  | -3.06014705726073 |
| H | 1.87058907881147  | 1.74268947133389  | -2.81103803238580 |
| C | 1.47479916401708  | -0.04859805272320 | -3.99383532492334 |
| H | 2.45413368136340  | -0.04069994373867 | -4.48759875364452 |
| C | 0.55052733606547  | -1.06503874877946 | -4.29380563664554 |
| H | 0.80907709504054  | -1.85463910462350 | -5.01155271294250 |
| C | -0.70653088755406 | -1.06669495996336 | -3.66592771122890 |
| C | -0.43548953536952 | 1.99908496274504  | -1.37516392063067 |
| H | -1.55421468866959 | 2.01978455985994  | -1.22814274665613 |
| H | -0.01722492765866 | 1.65696963276849  | -0.40729536903053 |
| C | 0.12590038308147  | 4.20472733780838  | -0.50767803362127 |
| H | 0.64240829151946  | 3.69647227687038  | 0.32774937781451  |
| H | -0.90749686385175 | 4.45906379208453  | -0.16753249525650 |
| C | 0.86601547188350  | 5.49357733752981  | -0.86177700801206 |
| H | 0.83917076381575  | 6.18462858135274  | 0.00145650419129  |
| H | 1.93982272285783  | 5.24922744740636  | -1.06615223301711 |
| C | -0.53585979592635 | 3.95963231482812  | -2.81209811020352 |
| H | -1.60373259831332 | 4.18859021930280  | -2.59408170665359 |
| H | -0.52301907021354 | 3.26496674271588  | -3.66980766584811 |
| C | 0.20536951993413  | 5.24603280377194  | -3.15999127516282 |
| H | 1.23895349401958  | 4.99183261125814  | -3.50853749376346 |
| H | -0.31257580384269 | 5.75452803694876  | -3.99406424490469 |
| C | 0.87415576064097  | 7.41848618498296  | -2.32566369111883 |
| H | 0.33936409193318  | 7.90631628022956  | -3.16018483279883 |
| H | 1.94763926217467  | 7.31007655208641  | -2.62126081805238 |
| H | 0.82856485165063  | 8.09071413014099  | -1.44998741387139 |
| C | -1.69587100157913 | -2.18988570068511 | -3.83459785123158 |
| H | -1.53928569187574 | -2.75699768682324 | -4.77195312271719 |
| H | -1.58721742436913 | -2.88439863783099 | -2.98059372350610 |
| C | -3.51388895080621 | -1.13076339534211 | -5.12106753710124 |
| H | -3.28878793191814 | -1.89672495654291 | -5.88902192088009 |
| H | -2.90119637089635 | -0.23277021829257 | -5.30697951143742 |
| C | -4.99525166759332 | -0.77588635190044 | -5.15805987324572 |
| H | -5.18643713379742 | 0.08695782792565  | -4.47795981424573 |
| H | -5.23771730463147 | -0.43117071379011 | -6.17965833160288 |
| C | -4.02203287001812 | -2.83381250455435 | -3.43666877219329 |
| H | -3.74366247378690 | -3.16532535785174 | -2.42100039252854 |
| H | -3.83907488446294 | -3.65645286821820 | -4.15534847266874 |
| C | -5.48133864855414 | -2.41412818652017 | -3.49374963224613 |

|    |                   |                   |                   |
|----|-------------------|-------------------|-------------------|
| H  | -6.10877170218934 | -3.28811717160636 | -3.24146095420130 |
| H  | -5.67317828319815 | -1.63980935154675 | -2.70438706459904 |
| C  | -7.24992761535134 | -1.62212026974570 | -4.94218475328352 |
| H  | -7.84745271515484 | -2.52324801653167 | -4.71818022965812 |
| H  | -7.47774137358740 | -1.30751059673432 | -5.97560512269211 |
| H  | -7.57583580714911 | -0.80668189625061 | -4.25292753646123 |
| N  | 0.10480676654748  | 3.30896068607165  | -1.66278160526027 |
| N  | 0.23765256285231  | 6.14907535938472  | -2.00788548107410 |
| N  | -3.11437138509991 | -1.70253531438867 | -3.79754969499290 |
| N  | -5.82909295849014 | -1.93243998709778 | -4.82587489645888 |
| Cl | -3.37390951707331 | 1.89781871829194  | -3.80203301288404 |
| Cl | -2.48172394742789 | -2.00122867930225 | -0.54819735655937 |
| Sb | -3.08305449171589 | -0.03482443010861 | -2.10541525383838 |

**Table S6.** Cartesian coordinates (Å) of **1**, two arms uncoordinated.

54

Coordinates from ORCA-job SbCl2\_un2\_opt

|   |                   |                   |                   |
|---|-------------------|-------------------|-------------------|
| C | 0.92140266868652  | 5.04978666241201  | -0.34111663109695 |
| C | 1.44261030108742  | 6.24618672542712  | -0.90259217760981 |
| C | 2.56619212881647  | 6.18879655545483  | -1.74998399923740 |
| H | 2.97279900579988  | 7.12417195134630  | -2.15463369995602 |
| C | 3.16222637573384  | 4.95905824300155  | -2.05250158600092 |
| H | 4.03412997858824  | 4.91746914885498  | -2.71704395581274 |
| C | 2.64326637914570  | 3.77921956712751  | -1.50201743578014 |
| H | 3.10501480776903  | 2.80520524375347  | -1.70593231512674 |
| C | 1.52844266432217  | 3.80149280356259  | -0.64049645955986 |
| C | 0.89023409203468  | 7.62170820951377  | -0.58068821214298 |
| H | 0.77251274503154  | 8.20321851110038  | -1.51471993714177 |
| H | -0.14490229763952 | 7.54137185645810  | -0.14827140607061 |
| C | 1.29827795258311  | 9.74969646197073  | 0.49776034441836  |
| H | 0.29046294865190  | 9.77116635540820  | 0.98189349346278  |
| H | 1.20641331870689  | 10.23007445869714 | -0.49417934728317 |
| C | 2.28192145609880  | 10.53337145487968 | 1.36342788772821  |
| H | 3.25454720089847  | 10.62652273923973 | 0.81727441299855  |
| H | 1.89262434247709  | 11.55490175071592 | 1.53006085896933  |
| C | 2.93010174242692  | 8.50745932769484  | 2.47154680908098  |
| H | 3.01564067905221  | 8.01971492528608  | 3.45976572856392  |
| H | 3.94198430300442  | 8.48588307628472  | 1.99388553808331  |
| C | 1.96043303787650  | 7.71408943176037  | 1.60141248319790  |
| H | 2.36054648344903  | 6.69933019771434  | 1.43248034148464  |
| H | 0.98788045445206  | 7.61207225133515  | 2.14974573091562  |
| C | 3.31470045375680  | 10.63962999761301 | 3.55074834595376  |
| H | 3.37441472464188  | 10.13683331014173 | 4.53240093898633  |
| H | 2.89205339903965  | 11.64805441254124 | 3.70792317132389  |
| H | 4.35548659779412  | 10.75840828274701 | 3.15999496461979  |
| C | 1.03657522044233  | 2.47018927843208  | -0.09542002108666 |
| H | 0.40373651341754  | 2.62389311632586  | 0.80362864807711  |
| H | 0.37727097009082  | 2.00338421843773  | -0.85326442609580 |
| C | 1.67780715571552  | 0.17054817650671  | 0.35363081286761  |
| H | 1.09984814985438  | -0.12908132318917 | -0.54045864634288 |
| H | 1.00666559628144  | 0.07063231095078  | 1.24136691051518  |

|    |                   |                   |                   |
|----|-------------------|-------------------|-------------------|
| C  | 2.87636656290117  | -0.76031049054402 | 0.52595609160118  |
| H  | 2.52214366503214  | -1.79366057723012 | 0.69963588160196  |
| H  | 3.47340126671460  | -0.76128039930542 | -0.42162665404573 |
| C  | 4.13380584970994  | 1.03890668210679  | 1.50508413543341  |
| H  | 4.81270107432545  | 1.14869110690577  | 0.62101520003919  |
| H  | 4.70592230296285  | 1.33552760477190  | 2.40398046401783  |
| C  | 2.93642985562925  | 1.96818918509084  | 1.33124194157935  |
| H  | 2.32495151423230  | 1.96763482002837  | 2.26420687371608  |
| H  | 3.28613418528759  | 3.00291895465677  | 1.16436975588658  |
| C  | 4.80128800695543  | -1.25289474882447 | 1.90620695594081  |
| H  | 4.42046560865826  | -2.27528646772528 | 2.08068577567034  |
| H  | 5.35763067365950  | -0.93647246160254 | 2.80680784292872  |
| H  | 5.52355793772322  | -1.29555957500967 | 1.05281663267989  |
| N  | 1.76675608278517  | 8.37502273809144  | 0.30945416269454  |
| N  | 2.45242561771475  | 9.87710108119547  | 2.65889101526309  |
| N  | 2.13727288217615  | 1.54801028112779  | 0.17447996463432  |
| N  | 3.68895983477987  | -0.34543226662302 | 1.66939824311323  |
| Sb | -0.77457789416731 | 5.31188346848244  | 1.00125031442506  |
| Cl | -2.15217294480369 | 3.52788530407979  | 0.16831208089072  |
| Cl | 0.25966511863552  | 4.28710975582068  | 2.91328433402662  |

**Table S7.** Cartesian coordinates (Å) of the *syn* isomer of **3**.

106

Coordinates from ORCA-job Sb2O2\_cis\_opt

|   |                   |                   |                  |
|---|-------------------|-------------------|------------------|
| C | 2.95631724230962  | 7.57141243646183  | 3.55046075973053 |
| C | 1.92540411322054  | 8.05895454896183  | 2.72229585854589 |
| C | 2.23457125461327  | 8.81630945538786  | 1.57806342771768 |
| H | 1.42569404240713  | 9.18120475495263  | 0.93136542159465 |
| C | 3.57217163284848  | 9.10759792873101  | 1.26828153225287 |
| H | 3.81295636337177  | 9.69938131945731  | 0.37653779975694 |
| C | 4.59928543550852  | 8.67108316856896  | 2.12036337270698 |
| H | 5.64349284556392  | 8.93599249223637  | 1.90378731002852 |
| C | 4.29776570686181  | 7.90465448889264  | 3.26317507869418 |
| C | 0.49570193930913  | 7.73918851851877  | 3.09541464318823 |
| H | -0.21485357565755 | 8.42463422235598  | 2.57964494138822 |
| H | 0.27418308259730  | 6.70953020933243  | 2.77035548203226 |
| C | -0.93091450786847 | 7.11413957718906  | 4.97313151833736 |
| H | -0.88946015342613 | 6.07463668438175  | 4.60291241363990 |
| H | -1.81622652396762 | 7.63268366794809  | 4.53711767917970 |
| C | -1.03591640043663 | 7.10627720057804  | 6.49388497060246 |
| H | -2.00279141382627 | 6.66056190350917  | 6.79245313453552 |
| H | -0.22525827079218 | 6.45613814119546  | 6.90659488130809 |
| C | 0.29016988361835  | 9.10481483656823  | 6.61900132775458 |
| H | 1.17987751385035  | 8.57544330635196  | 7.04549684522142 |
| H | 0.30763213243874  | 10.14087200846392 | 7.00562855785674 |
| C | 0.40870031590252  | 9.12930804237411  | 5.09883280879155 |
| H | -0.39218363043325 | 9.77652329690646  | 4.67112519465298 |
| H | 1.38407602895071  | 9.55486782585864  | 4.80111295875965 |
| C | -1.11518269146044 | 8.48213869161844  | 8.48098331313210 |
| H | -0.31076611871944 | 7.91624971707265  | 9.01315570168024 |
| H | -2.08647655847987 | 8.03428422367851  | 8.75732295037908 |

|   |                   |                   |                   |
|---|-------------------|-------------------|-------------------|
| H | -1.10053735827344 | 9.52379126747520  | 8.84911038838875  |
| C | 5.40276782019931  | 7.41556989875874  | 4.17798148736759  |
| H | 5.65006064405836  | 6.36870913563166  | 3.92277222186158  |
| H | 6.32513522923011  | 8.02644374912078  | 4.04089319684127  |
| C | 4.86038908100815  | 8.75074604189248  | 6.13999401377466  |
| H | 4.15726567008604  | 9.32815151047518  | 5.51215929108899  |
| H | 5.84841639911207  | 9.26756426096141  | 6.11058992141698  |
| C | 4.35610270666386  | 8.69824439843344  | 7.57833332225568  |
| H | 4.34166619025660  | 9.72136894131341  | 7.99794605081739  |
| H | 3.30265689292122  | 8.32090748732297  | 7.58488955545663  |
| C | 5.30253098426677  | 6.50831200033733  | 7.84603526947319  |
| H | 4.30373142900355  | 6.00615922284424  | 7.86139386350015  |
| H | 5.98719298991981  | 5.90464884630615  | 8.46996014481908  |
| C | 5.82081104608679  | 6.53776576267415  | 6.41185831643589  |
| H | 6.87733066547395  | 6.89465203873462  | 6.40486970123078  |
| H | 5.77824643223378  | 5.52173517896784  | 5.97915246684883  |
| C | 4.80001251138029  | 7.84958217828583  | 9.79484843639395  |
| H | 4.80305238330392  | 8.87868485743703  | 10.19694104956130 |
| H | 5.50103578740233  | 7.24429830024969  | 10.39694136900848 |
| H | 3.77355161559879  | 7.42808170108948  | 9.93305670797350  |
| C | 2.26033852877426  | 4.68755668446574  | 1.60265847853911  |
| C | 0.97003385814107  | 4.90216720141511  | 1.07160201683256  |
| C | 0.81391119536053  | 5.67281773880751  | -0.09721071587658 |
| H | -0.19064473654897 | 5.83135784078082  | -0.51341570221455 |
| C | 1.93517506027880  | 6.22498949028230  | -0.73729453284093 |
| H | 1.80742983533797  | 6.82893923891395  | -1.64410685309158 |
| C | 3.22192846922844  | 5.97387382542186  | -0.23596193869306 |
| H | 4.10393748951438  | 6.37842862741121  | -0.74980955839070 |
| C | 3.38594583567019  | 5.19827979815796  | 0.92593062482060  |
| C | -0.23589719110477 | 4.31580221045698  | 1.77811799291669  |
| H | -0.51403353833792 | 4.96812905996432  | 2.62659858889899  |
| H | -1.10904546288756 | 4.26349549535325  | 1.08700886715872  |
| C | -0.89447058003802 | 2.61948240173794  | 3.39912982281521  |
| H | -1.92475861874980 | 2.54751952026569  | 2.97832907609385  |
| H | -0.87364623840634 | 3.40790370333109  | 4.17337940429328  |
| C | -0.50097549413133 | 1.28108176478758  | 4.01595435676454  |
| H | 0.46417226986646  | 1.40538262612239  | 4.56642284049167  |
| H | -1.26744932635060 | 0.97795956318464  | 4.75287647040782  |
| C | 0.58580554235028  | 0.62932438532342  | 1.97749103256921  |
| H | 0.62315785831653  | -0.15275462270962 | 1.19649438290466  |
| H | 1.61179795545500  | 0.71023467944435  | 2.41694778465557  |
| C | 0.20819315736434  | 1.96197076469890  | 1.33925621121121  |
| H | 0.99243359846598  | 2.27779974486048  | 0.62719641713664  |
| H | -0.74384433109342 | 1.84513920282319  | 0.76995085259998  |
| C | -0.08892141483863 | -1.05910130591167 | 3.56591023748936  |
| H | -0.06678346199130 | -1.82640750051296 | 2.77127291552600  |
| H | -0.87081863031279 | -1.34136201486793 | 4.29339997125564  |
| H | 0.89690901731823  | -1.07992602310347 | 4.09324924335915  |
| C | 4.75640194401448  | 4.89596135992133  | 1.48825820522586  |
| H | 5.54812227027840  | 5.06100106150220  | 0.72240869434070  |
| H | 4.94521506002206  | 5.58298762196050  | 2.32890785783271  |



|    |                   |                   |                  |
|----|-------------------|-------------------|------------------|
| C  | 5.96553680815093  | 3.32974968474261  | 2.91782688698717 |
| H  | 5.88938583372360  | 4.07615459957790  | 3.72822803029484 |
| H  | 6.91900011262856  | 3.47762696845266  | 2.35945114615918 |
| C  | 5.93226326293192  | 1.92733968538954  | 3.51502234259191 |
| H  | 6.83687198607038  | 1.76983049780405  | 4.13109068823650 |
| H  | 5.04677959763073  | 1.84446522859184  | 4.19274020889247 |
| C  | 4.73561851951767  | 1.11407019783354  | 1.59815226046464 |
| H  | 3.77776910859803  | 0.97831012179795  | 2.16191373568806 |
| H  | 4.75188685866015  | 0.35802684016384  | 0.79111835249749 |
| C  | 4.75624919634510  | 2.51003532006648  | 0.98521720191331 |
| H  | 5.63422360099916  | 2.60747427504572  | 0.30488901730675 |
| H  | 3.84248404648340  | 2.67484992793358  | 0.38610520981550 |
| C  | 5.92444426256427  | -0.43891093323000 | 3.01396069815989 |
| H  | 6.83548048629703  | -0.57578358910938 | 3.62360608838858 |
| H  | 5.94583586777179  | -1.17960471002391 | 2.19438440673087 |
| H  | 5.04004803526600  | -0.66435044955879 | 3.66012257452380 |
| N  | 4.97287345133541  | 7.39894176913097  | 5.57847952088719 |
| N  | 5.22805446204229  | 7.86172213635993  | 8.40302787612548 |
| N  | 0.31416629760766  | 7.76906217542835  | 4.55294765928157 |
| N  | -0.95887531130146 | 8.46682121046490  | 7.03341142295316 |
| N  | 0.06860136544721  | 3.00649036852819  | 2.36111924670630 |
| N  | -0.39818582160674 | 0.24144746263816  | 2.98821319715735 |
| N  | 4.80900502638735  | 3.53421560006911  | 2.03670082690452 |
| N  | 5.89740883035334  | 0.90822747620937  | 2.46214927997093 |
| O  | 1.17381082161480  | 4.93999918433407  | 4.37019691705846 |
| O  | 3.80752479411569  | 4.86443396508604  | 4.48968122864232 |
| Sb | 2.49331106062325  | 6.24583477304019  | 5.23975650335017 |
| Sb | 2.49470071053987  | 3.62942262308015  | 3.51279476929625 |

**Table S8.** Cartesian coordinates (Å) of the *anti* isomer of **3**.

106

Coordinates from ORCA-job Sb2O2\_trans\_opt

|   |                  |                   |                  |
|---|------------------|-------------------|------------------|
| C | 6.88824319943843 | 7.99086468465234  | 7.88914544530318 |
| C | 7.09092855043943 | 6.60295540916487  | 7.73862295792403 |
| C | 7.76565825988257 | 6.10946206022783  | 6.60532811965780 |
| H | 7.91168260380783 | 5.02693862553885  | 6.48730948623415 |
| C | 8.23730678202269 | 6.99512246367186  | 5.62260821968998 |
| H | 8.75524747213657 | 6.60699443292329  | 4.73669671292268 |
| C | 8.01895187842239 | 8.37563964355263  | 5.76056655837161 |
| H | 8.36340567942380 | 9.06865243056760  | 4.98069813454785 |
| C | 7.34542481524007 | 8.87693732422309  | 6.89117242845212 |
| C | 7.10690036797257 | 10.36124205016510 | 7.07217320564820 |
| H | 7.82379605396275 | 10.74603039543631 | 7.82205509393070 |
| H | 7.26573913313439 | 10.90975045957139 | 6.11542158670587 |
| C | 4.69267277278274 | 10.30822375192417 | 6.66865873164115 |
| H | 4.81235961545633 | 9.26386716039375  | 6.32773250083734 |
| H | 4.76547706576365 | 10.97080029404191 | 5.77465596764375 |
| C | 3.33072187002811 | 10.48666616053445 | 7.33353956860359 |
| H | 2.53269749482262 | 10.31455643802963 | 6.58736893780853 |
| H | 3.21243570805390 | 9.71153907697218  | 8.13210579448722 |
| C | 4.26435250436888 | 12.13491105320882 | 8.81995174128231 |

|    |                   |                   |                   |
|----|-------------------|-------------------|-------------------|
| H  | 4.21792662716303  | 11.47274101062115 | 9.72013070322047  |
| H  | 4.15011303096500  | 13.17741107853117 | 9.17107075570065  |
| C  | 5.62579103268159  | 11.97035167501654 | 8.15464964471677  |
| H  | 5.74276408405541  | 12.72772745195014 | 7.34482568684446  |
| H  | 6.42609209125767  | 12.11002808277798 | 8.90155595595782  |
| C  | 1.87294869221036  | 12.03279235513110 | 8.47916408112641  |
| H  | 1.68694072043821  | 11.35253631293129 | 9.34666979383513  |
| H  | 1.08323278159410  | 11.85258899893796 | 7.72776198569697  |
| H  | 1.77595630677154  | 13.07393175264657 | 8.83555108752684  |
| C  | 6.58027817749415  | 5.67313500834822  | 8.81906838556484  |
| H  | 6.56035937181408  | 4.61847717804104  | 8.46024794253308  |
| H  | 7.25885261235104  | 5.73575352765935  | 9.69083525236173  |
| C  | 4.89273233934771  | 5.47668818186773  | 10.57058101041313 |
| H  | 5.69937597368845  | 5.70550176449314  | 11.28818457294254 |
| H  | 4.80465122120175  | 4.37120239853042  | 10.45585877407719 |
| C  | 3.57395564496472  | 6.04821693940061  | 11.07789356543859 |
| H  | 3.28319838849674  | 5.53035180177857  | 12.01083279646091 |
| H  | 3.71918421347465  | 7.12883611077135  | 11.32720188165037 |
| C  | 2.87956668140712  | 6.48005319265513  | 8.81388594126486  |
| H  | 2.96821182711451  | 7.59158092762237  | 8.91040203531256  |
| H  | 2.08148313010067  | 6.27704396547067  | 8.07557082050531  |
| C  | 4.20151668132098  | 5.91985595720142  | 8.29678152151302  |
| H  | 4.08201514443700  | 4.83862991438792  | 8.05151642723651  |
| H  | 4.49878738511041  | 6.44688747876137  | 7.37209780502819  |
| C  | 1.22977534324411  | 6.35809305780792  | 10.57238436748523 |
| H  | 0.95705489120546  | 5.83851658400094  | 11.50836500655604 |
| H  | 0.44145013563752  | 6.15514699001511  | 9.82533027155588  |
| H  | 1.23735872734106  | 7.45707509825530  | 10.77754177679028 |
| N  | 5.76789885313530  | 10.61100932714494 | 7.62164481547024  |
| N  | 3.18377996805117  | 11.83815296158847 | 7.87521702588310  |
| N  | 5.26037958653363  | 6.10552348561922  | 9.29708014653188  |
| N  | 2.50995626180994  | 5.86137799552360  | 10.08743143081038 |
| O  | 7.22262759243782  | 10.18917202030012 | 10.10959288725890 |
| Sb | 5.82416800773405  | 8.76145143094276  | 9.63831034796048  |
| C  | 6.27020224242582  | 9.97808741665676  | 13.02032858393087 |
| C  | 5.83332869043792  | 11.31899251529721 | 12.96643094088440 |
| C  | 4.68026212350392  | 11.71371595663724 | 13.67214519066299 |
| H  | 4.35057973312837  | 12.76115152446721 | 13.63336488651241 |
| C  | 3.96423150274930  | 10.77782615079775 | 14.43615481164094 |
| H  | 3.06968249466818  | 11.08963549536213 | 14.98962550369226 |
| C  | 4.41597506492469  | 9.45072903790865  | 14.52000962754864 |
| H  | 3.87914311189130  | 8.72440405777056  | 15.14577310117370 |
| C  | 5.56810054302001  | 9.04848451023787  | 13.81703278377292 |
| C  | 6.06837161559690  | 7.62129851997577  | 13.88645475268831 |
| H  | 5.75631886843839  | 7.09663448311430  | 12.96519058700431 |
| H  | 5.63339178484393  | 7.08960504270126  | 14.76383164022896 |
| C  | 8.09617948969648  | 8.07632930449899  | 15.16499354030856 |
| H  | 7.71203099328301  | 9.09819693654513  | 15.33663235768547 |
| H  | 7.76591732869609  | 7.43823221284180  | 16.01808049636356 |
| C  | 9.61971766122593  | 8.09417696117454  | 15.10024899762735 |
| H  | 10.02562269303889 | 8.41924763761664  | 16.07627204660313 |

|    |                   |                   |                   |
|----|-------------------|-------------------|-------------------|
| H  | 9.94358828913251  | 8.84699773478388  | 14.33739357486090 |
| C  | 9.58567267502324  | 6.28104299793488  | 13.52448315367643 |
| H  | 9.90834390518097  | 6.92307823227150  | 12.66749950370671 |
| H  | 9.96724854731068  | 5.26063984738992  | 13.33524535341843 |
| C  | 8.06153298362525  | 6.25032497650409  | 13.57280193263198 |
| H  | 7.72589056250844  | 5.49352904751760  | 14.31994085384451 |
| H  | 7.66338238671952  | 5.98148588221893  | 12.57813368885249 |
| C  | 11.59732389421366 | 6.74446670376201  | 14.78411568930990 |
| H  | 12.03859110583342 | 7.41460758419056  | 14.00531450894538 |
| H  | 11.98147929890150 | 7.06626253441374  | 15.76876969370994 |
| H  | 11.95799224022620 | 5.71774459758350  | 14.59419992563200 |
| C  | 6.61617673371738  | 12.30917353766621 | 12.13064962008044 |
| H  | 6.36482607624788  | 13.35662000263781 | 12.41594246479451 |
| H  | 6.34927111417623  | 12.15862064608804 | 11.06890035500357 |
| C  | 8.81605697324056  | 12.70514740229929 | 11.15409471479743 |
| H  | 8.40695509162834  | 12.33288913512019 | 10.19790363366631 |
| H  | 8.69707623992276  | 13.81305476297411 | 11.19869139625217 |
| C  | 10.29453596090172 | 12.34453247344900 | 11.25555689315360 |
| H  | 10.85945393176585 | 12.88997396302290 | 10.47711742017238 |
| H  | 10.41576180090051 | 11.25135598384080 | 11.05292862611129 |
| C  | 10.07926426520778 | 12.03951280136831 | 13.62887377263914 |
| H  | 10.18827245391733 | 10.92674541666608 | 13.57004769122899 |
| H  | 10.48222405261752 | 12.35776275757957 | 14.60837450238584 |
| C  | 8.59954881665063  | 12.39959514324663 | 13.54840559286882 |
| H  | 8.46864838267334  | 13.48834073461505 | 13.75217621087850 |
| H  | 8.03126035895707  | 11.84025126437995 | 14.31358276400882 |
| C  | 12.25922140336856 | 12.42469861342946 | 12.66354513306987 |
| H  | 12.80405871006228 | 12.97895993104395 | 11.87853376679139 |
| H  | 12.64242857571641 | 12.75544912239574 | 13.64560655522064 |
| H  | 12.49789215858977 | 11.33844343070067 | 12.54767118078481 |
| N  | 7.53539735772876  | 7.57974753426140  | 13.90283858503001 |
| N  | 10.14127514544979 | 6.76290531038943  | 14.79184182478497 |
| N  | 8.05817405325777  | 12.05405431778143 | 12.22875419644618 |
| N  | 10.83391107373976 | 12.70732337993413 | 12.56872681959386 |
| O  | 6.93917528400257  | 7.73926275750885  | 11.02656370263957 |
| Sb | 7.97710822056428  | 9.32109650089481  | 11.79798174775653 |

**Table S9.** Cartesian coordinates (Å) of the monomer of **3**.

53

Coordinates from ORCA-job SbO\_opt

|   |                   |                  |                   |
|---|-------------------|------------------|-------------------|
| C | 2.53906518378937  | 4.19835345872031 | 1.19490652050362  |
| C | 1.33583859746841  | 4.61073955273073 | 0.58960500432795  |
| C | 1.36589972402652  | 5.45602965540599 | -0.53644172780507 |
| H | 0.42796099219015  | 5.76720295811040 | -1.01667851863677 |
| C | 2.59724526645865  | 5.91616863575683 | -1.03479129687842 |
| H | 2.62222251196804  | 6.56211547202620 | -1.92107311414913 |
| C | 3.79412157253472  | 5.57507601507967 | -0.38127363089552 |
| H | 4.75063994614358  | 5.97909352071192 | -0.74050791064312 |
| C | 3.76329012517832  | 4.72991702065221 | 0.74503260908277  |
| C | 0.03516438160856  | 4.25775733168608 | 1.28427129753911  |
| H | -0.10317726269386 | 4.97441799653072 | 2.11620306594984  |

|    |                   |                   |                  |
|----|-------------------|-------------------|------------------|
| H  | -0.83815991676067 | 4.37269040602840  | 0.60493692361106 |
| C  | -0.88072112040779 | 2.79115303426861  | 3.01022922703163 |
| H  | -1.91093989738570 | 3.05422074822461  | 2.68307450541912 |
| H  | -0.55207792318983 | 3.50475330716956  | 3.78814369480814 |
| C  | -0.86915318482473 | 1.37775759008597  | 3.58109044977891 |
| H  | 0.12177277319759  | 1.18379732746783  | 4.06123993973992 |
| H  | -1.63349336629825 | 1.30780831702606  | 4.37631804061621 |
| C  | -0.18100053694013 | 0.47761781369738  | 1.47013542935554 |
| H  | -0.43446217199633 | -0.25818157979856 | 0.68472843426112 |
| H  | 0.84532273330542  | 0.23239505627694  | 1.84052911342949 |
| C  | -0.17558441020857 | 1.87375313952204  | 0.85651336896512 |
| H  | 0.62386041272288  | 1.95617075436074  | 0.09696305693063 |
| H  | -1.14969353104337 | 2.06108623488206  | 0.35163403879098 |
| C  | -1.25841773240096 | -0.95807397014740 | 3.08718355862281 |
| H  | -1.53361259918830 | -1.66810170283746 | 2.28692251532157 |
| H  | -2.04211658340676 | -0.99722090918313 | 3.86436957856277 |
| H  | -0.30040688298001 | -1.30667813359356 | 3.54517712551079 |
| C  | 4.99353431632457  | 4.50369995708782  | 1.60200482052530 |
| H  | 5.93028641262739  | 4.70282672150526  | 1.03608547418992 |
| H  | 4.95670165129817  | 5.23080017770942  | 2.43548746697569 |
| C  | 5.81687707991473  | 3.13547684661597  | 3.45056023143971 |
| H  | 5.31906330222571  | 3.81062590979730  | 4.17081989635817 |
| H  | 6.84892692718253  | 3.50265235999283  | 3.25648656866736 |
| C  | 5.87434553625713  | 1.72769146257903  | 4.03237128150850 |
| H  | 6.53371862975811  | 1.73488295265904  | 4.91930982135691 |
| H  | 4.85487104176374  | 1.43350320287669  | 4.38462633159217 |
| C  | 5.55694314846336  | 0.76373030276549  | 1.86206553053127 |
| H  | 4.52115156522556  | 0.41597737520783  | 2.10088936458072 |
| H  | 5.98171480575188  | 0.05758767943900  | 1.12487519896866 |
| C  | 5.49103153663782  | 2.15238126067447  | 1.23506577818624 |
| H  | 6.49829997128223  | 2.43629131159006  | 0.85617972524791 |
| H  | 4.79122594509411  | 2.15426628907861  | 0.37886559749627 |
| C  | 6.55786205635415  | -0.55596154614106 | 3.62133150936189 |
| H  | 7.23720654567004  | -0.51565023649567 | 4.49117143066342 |
| H  | 7.00168965184388  | -1.23423245230751 | 2.87084833995508 |
| H  | 5.58968552350720  | -0.99989204961602 | 3.95987153673715 |
| N  | 0.05901886840253  | 2.91073079164909  | 1.87912921260086 |
| N  | -1.17242452862400 | 0.39063966995306  | 2.54213451882521 |
| N  | 5.02491367378177  | 3.16073592277252  | 2.20582133626113 |
| N  | 6.40622306063233  | 0.77723178758458  | 3.05288709881471 |
| O  | 2.35785224424331  | 3.66049117893798  | 4.33023537557648 |
| Sb | 2.51295793351476  | 2.66663707322306  | 2.76350125442819 |

**Table S10.** Cartesian coordinates (Å) of the *syn* isomer of **4**.

106

Coordinates from ORCA-job Bi2O2\_cis\_opt

|   |                  |                  |                  |
|---|------------------|------------------|------------------|
| C | 2.97004614518348 | 7.57840874462272 | 3.59116829911121 |
| C | 1.93436205103906 | 8.04219659286598 | 2.75773896765590 |
| C | 2.24102028265640 | 8.78433789656407 | 1.60208495215029 |
| H | 1.43190569855443 | 9.13484425379674 | 0.94750499029944 |
| C | 3.57852594192708 | 9.07431488022483 | 1.28737640219836 |

|   |                   |                   |                   |
|---|-------------------|-------------------|-------------------|
| H | 3.81653598982974  | 9.65352889531312  | 0.38663446638789  |
| C | 4.60997113399426  | 8.64701659963298  | 2.13999604385170  |
| H | 5.65385182909754  | 8.90410707223673  | 1.91171122335184  |
| C | 4.31142745411610  | 7.89789622487267  | 3.29574735585787  |
| C | 0.50565570922851  | 7.70606552362171  | 3.12753547771967  |
| H | -0.21264845061274 | 8.35355824704330  | 2.57458172179399  |
| H | 0.31130249592481  | 6.65947192596820  | 2.84164411454795  |
| C | -0.94457193122916 | 7.12517580056422  | 5.00320217607154  |
| H | -0.88151230534146 | 6.07563990105888  | 4.66394718286431  |
| H | -1.83380617787478 | 7.61806643603747  | 4.54536781124390  |
| C | -1.06396964381632 | 7.15600208792767  | 6.52275099122129  |
| H | -2.03110789220393 | 6.71351579101996  | 6.82479221623164  |
| H | -0.25718328410663 | 6.51535216072095  | 6.96122268674920  |
| C | 0.24518994191091  | 9.17130074634562  | 6.60592862615507  |
| H | 1.14291674704644  | 8.66491218971166  | 7.04842284233434  |
| H | 0.24915226954564  | 10.21538255177796 | 6.97052114267399  |
| C | 0.36644262605485  | 9.16095943762653  | 5.08580289239954  |
| H | -0.44442001647999 | 9.78492640055292  | 4.64211235286294  |
| H | 1.33506051767490  | 9.59494855754414  | 4.77893390367619  |
| C | -1.15760853140503 | 8.57420403118976  | 8.47914918112262  |
| H | -0.35059665213458 | 8.02631703199874  | 9.02669592592866  |
| H | -2.12609078935777 | 8.12457144308945  | 8.76194063671495  |
| H | -1.15218261146261 | 9.62373702686727  | 8.82410291193102  |
| C | 5.41678653832132  | 7.40507091820482  | 4.21003355414175  |
| H | 5.61347654489981  | 6.33888680908078  | 3.99304628316019  |
| H | 6.35855360615464  | 7.97449720580136  | 4.03259648039731  |
| C | 4.93334988029576  | 8.82575760326227  | 6.13300960465349  |
| H | 4.24125720319558  | 9.39529958503184  | 5.48659337152568  |
| H | 5.93083233270257  | 9.32310501821801  | 6.08871033165901  |
| C | 4.42762538963458  | 8.82607861502966  | 7.57174033726420  |
| H | 4.42275061731679  | 9.86099555222166  | 7.96119897209022  |
| H | 3.36742533268766  | 8.46261987807050  | 7.58848755906714  |
| C | 5.35927262506090  | 6.63579602363894  | 7.91067421779700  |
| H | 4.35969505171497  | 6.13276460554721  | 7.95240936466009  |
| H | 6.04507821987916  | 6.05228057250531  | 8.55208560874403  |
| C | 5.86783183469110  | 6.61392930283401  | 6.47252754854501  |
| H | 6.92712060247916  | 6.96209262196011  | 6.44726101366936  |
| H | 5.81420827082096  | 5.58458866946735  | 6.07306990597981  |
| C | 4.85852026002809  | 8.04006043091131  | 9.81488632184884  |
| H | 4.86593188702686  | 9.08127326762899  | 10.18397700049688 |
| H | 5.55581383008052  | 7.45054744898243  | 10.43641823384570 |
| H | 3.82969622996359  | 7.62786231356299  | 9.96524169811917  |
| C | 2.23905241380577  | 4.64050541111715  | 1.61841278037572  |
| C | 0.94639151673530  | 4.86200410211521  | 1.10080250055008  |
| C | 0.78588795153712  | 5.64782400630120  | -0.05810786236318 |
| H | -0.21997889006127 | 5.81540462497819  | -0.46809988327476 |
| C | 1.90637204413975  | 6.20635379464504  | -0.69523669120324 |
| H | 1.77581968413805  | 6.82105121621726  | -1.59443338013592 |
| C | 3.19552938299553  | 5.95461716761286  | -0.19832113240608 |
| H | 4.07447786442967  | 6.37278515644523  | -0.70681088104573 |
| C | 3.36412394682811  | 5.16595445171884  | 0.95477134493595  |

|    |                   |                   |                  |
|----|-------------------|-------------------|------------------|
| C  | -0.25546705903040 | 4.27512844123085  | 1.81562247018268 |
| H  | -0.49403913507219 | 4.90421298340869  | 2.69345916635094 |
| H  | -1.14557382942805 | 4.26290106008854  | 1.14464878150010 |
| C  | -0.94062187288341 | 2.53140459274486  | 3.37508833616521 |
| H  | -1.96969539905441 | 2.47458365388860  | 2.94861350650297 |
| H  | -0.91991678653563 | 3.29887859034503  | 4.17026557767528 |
| C  | -0.55620940136209 | 1.17493242198687  | 3.95783743067048 |
| H  | 0.40104061193721  | 1.28048779583182  | 4.52925517794620 |
| H  | -1.33097859346165 | 0.85099223365931  | 4.67688903801398 |
| C  | 0.54177123070646  | 0.57910936173199  | 1.90417117399277 |
| H  | 0.58255462978826  | -0.18493413258884 | 1.10586241380213 |
| H  | 1.57028414866019  | 0.65129291948539  | 2.34404304646467 |
| C  | 0.15960715416597  | 1.92628889742708  | 1.30032955991318 |
| H  | 0.93867012670414  | 2.26047053933124  | 0.59135254520661 |
| H  | -0.79635663656697 | 1.82259894514526  | 0.73499208965302 |
| C  | -0.12804580171804 | -1.15066095726312 | 3.45125159156368 |
| H  | -0.09620042134992 | -1.89672151304164 | 2.63715678875785 |
| H  | -0.91347781557974 | -1.45523702857829 | 4.16564403522756 |
| H  | 0.85430636697847  | -1.18031541256416 | 3.98513287190910 |
| C  | 4.73656791558045  | 4.87437225767259  | 1.52215161497311 |
| H  | 5.53208530920834  | 5.08809145004075  | 0.77216804501524 |
| H  | 4.89928490463447  | 5.53336724824796  | 2.39042982808211 |
| C  | 5.98499261455269  | 3.28957681696951  | 2.89835200977770 |
| H  | 5.89831562226015  | 4.01551823429395  | 3.72685191786689 |
| H  | 6.93666593407580  | 3.46144397489979  | 2.34332222324875 |
| C  | 5.96875421906369  | 1.87384482380049  | 3.46421330478175 |
| H  | 6.87753332229892  | 1.70947812512028  | 4.07200055596347 |
| H  | 5.08943290204740  | 1.76900379068074  | 4.14938074999038 |
| C  | 4.77130710266225  | 1.09144339249941  | 1.53253096939834 |
| H  | 3.81229124991436  | 0.93578450809470  | 2.09287044372452 |
| H  | 4.79180026461701  | 0.35039928067861  | 0.71189680257738 |
| C  | 4.78282089617751  | 2.50023567059129  | 0.94898650997965 |
| H  | 5.66162244818228  | 2.61740602875500  | 0.27245848967449 |
| H  | 3.86906982611197  | 2.67046918090989  | 0.35151065184105 |
| C  | 5.96932743822604  | -0.48230396205118 | 2.91823410416590 |
| H  | 6.88331150675150  | -0.62605790032482 | 3.52163368544720 |
| H  | 5.99057706056576  | -1.20691650506035 | 2.08455180733646 |
| H  | 5.08863101968494  | -0.72453012848808 | 3.56393528487263 |
| N  | 5.01784339008879  | 7.45402690243396  | 5.62105034414269 |
| N  | 5.28642372044643  | 8.00521229379617  | 8.42367403154224 |
| N  | 0.29566458240775  | 7.78584027407024  | 4.58001826390285 |
| N  | -0.99472075143545 | 8.52693286756847  | 7.03341115076199 |
| N  | 0.02961952984425  | 2.93965949015815  | 2.35275115638545 |
| N  | -0.43823479892433 | 0.16322152580771  | 2.90598433306259 |
| N  | 4.82400137309692  | 3.49639983833878  | 2.02502183617585 |
| N  | 5.93191084954999  | 0.87502669374412  | 2.39363291344972 |
| O  | 1.09547808709917  | 4.84915875247514  | 4.50686278217684 |
| O  | 3.87839937449225  | 4.78369536921520  | 4.62500222295236 |
| Bi | 2.49316317038254  | 6.24202281880086  | 5.39197975866858 |
| Bi | 2.48911968017679  | 3.49223467008437  | 3.58744190835839 |

**Table S11.** Cartesian coordinates (Å) of the *anti* isomer of **4**.

106

Coordinates from ORCA-job Bi2O2\_trans\_pip

|   |                   |                   |                   |
|---|-------------------|-------------------|-------------------|
| C | 6.89045321724307  | 8.36348770092264  | 8.91795306885698  |
| C | 7.36718920819165  | 7.04218872598267  | 9.04234051370653  |
| C | 8.61225359485579  | 6.69108054401789  | 8.48336428148342  |
| H | 8.98018655477662  | 5.65949182203283  | 8.57421315092037  |
| C | 9.37589187614906  | 7.65284695164562  | 7.79998420095482  |
| H | 10.34322271450269 | 7.37545327257424  | 7.36279246756963  |
| C | 8.88392617919165  | 8.96026962707452  | 7.64494968072153  |
| H | 9.46408627040127  | 9.70316201583040  | 7.07988531401801  |
| C | 7.63955450697217  | 9.31891781588686  | 8.20030957152574  |
| C | 7.10031355453710  | 10.72901710269924 | 8.06855996254282  |
| H | 7.29664477920051  | 11.26357418326171 | 9.01576756706966  |
| H | 7.60776733772232  | 11.27166080126855 | 7.23772055591108  |
| C | 5.21745732793408  | 10.20900646150523 | 6.60253857525262  |
| H | 5.64821649227305  | 9.19921788180286  | 6.47609392214582  |
| H | 5.60041037780329  | 10.85121390251178 | 5.77461556527687  |
| C | 3.69578023707179  | 10.13969673041934 | 6.53185929875391  |
| H | 3.38641027090692  | 9.79256499447575  | 5.52854110469022  |
| H | 3.32950752720770  | 9.37994722662810  | 7.27074145957831  |
| C | 3.53089966732557  | 11.96922952986985 | 8.08210505363439  |
| H | 3.15170312127629  | 11.32674309504473 | 8.91781754508524  |
| H | 3.09948728339691  | 12.97724424700741 | 8.22356596007278  |
| C | 5.05172677718516  | 12.04857290316361 | 8.16991115099227  |
| H | 5.42770729908279  | 12.80983592625900 | 7.44654512186695  |
| H | 5.35197492976105  | 12.33895671437436 | 9.19314958953045  |
| C | 1.65271272501095  | 11.42116204796706 | 6.66072757429523  |
| H | 1.16846222947854  | 10.74400694804343 | 7.40775876894168  |
| H | 1.36691251358487  | 11.07532157431671 | 5.65120488414510  |
| H | 1.24216870296670  | 12.43637290338109 | 6.80499608132136  |
| C | 6.54220625695018  | 6.03005152042508  | 9.81107271934763  |
| H | 6.85607842409223  | 4.99019980671943  | 9.56119960353446  |
| H | 6.70714688437436  | 6.20168583532961  | 10.88993143745102 |
| C | 4.29061179738609  | 5.54751198285726  | 10.60842291909712 |
| H | 4.61624140965721  | 5.92900523214707  | 11.59319060173727 |
| H | 4.44562566654568  | 4.44352783874226  | 10.57213441388234 |
| C | 2.81320620645378  | 5.86240007155161  | 10.39676724162447 |
| H | 2.20683339134493  | 5.29357325524098  | 11.12547991904661 |
| H | 2.63999151109614  | 6.95005411339564  | 10.60110120725988 |
| C | 3.20069493682664  | 6.19108183792307  | 8.04698765331515  |
| H | 3.05864725706518  | 7.30206318047660  | 8.10134864126026  |
| H | 2.87838854536736  | 5.87151624222405  | 7.03860916595943  |
| C | 4.67885404886437  | 5.86804224848691  | 8.23803509917679  |
| H | 4.85120729316521  | 4.78331089747403  | 8.04300566615965  |
| H | 5.28891002674783  | 6.44428656209808  | 7.51901770970991  |
| C | 0.96386102189852  | 5.74702396650126  | 8.84307491064053  |
| H | 0.37582450779549  | 5.17323414629477  | 9.58129508070645  |
| H | 0.66471057261143  | 5.41513955498761  | 7.83276059214347  |
| H | 0.68979109033503  | 6.82635108151737  | 8.94763257952562  |
| N | 5.64188697672872  | 10.73263745956483 | 7.90424164992209  |

|    |                   |                   |                   |
|----|-------------------|-------------------|-------------------|
| N  | 3.10332676129983  | 11.45236171693698 | 6.78085558278252  |
| N  | 5.10403335089754  | 6.22640425946384  | 9.59417346333186  |
| N  | 2.38471595888509  | 5.50121405077673  | 9.04424572901373  |
| O  | 6.06736902443177  | 10.69210013291005 | 10.90605171744660 |
| Bi | 5.01332276394952  | 9.01379268777228  | 10.07361118171973 |
| C  | 6.43635681946016  | 10.36835420604530 | 14.17221920086485 |
| C  | 6.29675618745866  | 11.75924160210633 | 14.34961287312030 |
| C  | 5.75684540634605  | 12.25901406892176 | 15.55110959485299 |
| H  | 5.65652949911577  | 13.34380127428674 | 15.69540801744475 |
| C  | 5.35852090554801  | 11.37401523234545 | 16.56755966033904 |
| H  | 4.94568769998758  | 11.76667750102797 | 17.50524559920670 |
| C  | 5.51152844085961  | 9.98788699915339  | 16.39413341227695 |
| H  | 5.21926574183689  | 9.29731632315834  | 17.19746230542155 |
| C  | 6.04996689196981  | 9.47992696467819  | 15.19523341637436 |
| C  | 6.20273624166806  | 7.98945926426564  | 14.96396781075025 |
| H  | 5.40838402469742  | 7.65615646665061  | 14.26929123627741 |
| H  | 6.09715175134866  | 7.42597211734247  | 15.91951757965188 |
| C  | 8.64697656134320  | 7.91934290304456  | 15.14980252478603 |
| H  | 8.60458696094866  | 8.95934321742603  | 15.52085194559249 |
| H  | 8.63420462771781  | 7.23908807160745  | 16.03348894930911 |
| C  | 9.92916041241174  | 7.70251043806030  | 14.35080617561538 |
| H  | 10.80458069589674 | 7.82865471913002  | 15.01473815101665 |
| H  | 10.00213451225448 | 8.49133981409118  | 13.55749455620431 |
| C  | 8.78732429305021  | 6.11922719038693  | 12.93874118397623 |
| H  | 8.77346408569504  | 6.79133454016525  | 12.04322998140677 |
| H  | 8.82566759437053  | 5.07969663789979  | 12.56350166961308 |
| C  | 7.50463342803460  | 6.32690965306140  | 13.73581697328848 |
| H  | 7.43425346277177  | 5.55937109596232  | 14.54155355091822 |
| H  | 6.63080658418378  | 6.23871358287859  | 13.06685230366118 |
| C  | 11.20211718255460 | 6.13032413997401  | 13.03317698476827 |
| H  | 11.32066706017056 | 6.81784761463323  | 12.15942090324273 |
| H  | 12.07106869708280 | 6.27139378391497  | 13.70063203801896 |
| H  | 11.22405738970970 | 5.09263968311381  | 12.65518424248447 |
| C  | 6.71686760202089  | 12.68289229938988 | 13.22329092822208 |
| H  | 6.77829940043006  | 13.73795703603259 | 13.57658547086399 |
| H  | 5.96203121792693  | 12.62462096096648 | 12.41599547410565 |
| C  | 8.24649111832987  | 12.87575609351304 | 11.32652617887424 |
| H  | 7.36948350221306  | 12.67476187411881 | 10.68656440992156 |
| H  | 8.37810629790670  | 13.97718720133911 | 11.44027101537865 |
| C  | 9.49499253645432  | 12.27050216442722 | 10.69447376025292 |
| H  | 9.71703386382721  | 12.78871209187944 | 9.74317343559875  |
| H  | 9.29258851896923  | 11.19787404327872 | 10.44508259719799 |
| C  | 10.38182364771342 | 11.79273034491223 | 12.88297730113965 |
| H  | 10.24716435266554 | 10.68309967947019 | 12.79351303863872 |
| H  | 11.25320170652590 | 11.96113564661213 | 13.54283324849989 |
| C  | 9.13357303542946  | 12.39479172312105 | 13.52172037833488 |
| H  | 9.31185522451249  | 13.47133953406858 | 13.75230664559695 |
| H  | 8.90718199167902  | 11.87695206853176 | 14.47119094794053 |
| C  | 11.86005090731647 | 11.86051879361395 | 10.97533866445086 |
| H  | 12.06518121536310 | 12.37841195962426 | 10.02146492104778 |
| H  | 12.72279440060069 | 12.02198406572464 | 11.64622366860499 |



|    |                   |                   |                   |
|----|-------------------|-------------------|-------------------|
| H  | 11.78559109587036 | 10.76511922525504 | 10.76371628832302 |
| N  | 7.47688911057295  | 7.68149804145645  | 14.29753230112228 |
| N  | 9.96807807919498  | 6.36061636117572  | 13.77139831298139 |
| N  | 7.98467352461436  | 12.24192779648282 | 12.62262689690100 |
| N  | 10.65255279806505 | 12.40312279340780 | 11.58218676771850 |
| O  | 5.77246813699819  | 8.10648524104898  | 11.86760403649967 |
| Bi | 7.34075159552709  | 9.55462452343223  | 12.24049099464205 |

**Table S12.** Cartesian coordinates (Å) of the monomer of **4**.

53

Coordinates from ORCA-job BiO\_opt

|   |                   |                   |                   |
|---|-------------------|-------------------|-------------------|
| C | 2.53593771768331  | 4.22100907628422  | 1.24997512102621  |
| C | 1.33259804144416  | 4.61470796127577  | 0.63370516890843  |
| C | 1.36457744424108  | 5.42933849608994  | -0.51536248617497 |
| H | 0.42713089178172  | 5.72740913742209  | -1.00523719582061 |
| C | 2.59640570959183  | 5.87313327422340  | -1.02696771522812 |
| H | 2.62217122921450  | 6.49547144837482  | -1.92996132395528 |
| C | 3.79326241584781  | 5.54185395449875  | -0.36875506528426 |
| H | 4.75118806958300  | 5.92765880347394  | -0.74453008801981 |
| C | 3.76276539438796  | 4.72795942578604  | 0.78138435756076  |
| C | 0.02343515225658  | 4.27280384049577  | 1.32060463459774  |
| H | -0.11451739573077 | 4.98387575985285  | 2.15750308523332  |
| H | -0.84153515159361 | 4.40195992796425  | 0.63232738098411  |
| C | -0.99797039450522 | 2.77339917675025  | 2.95745780055657  |
| H | -2.01027562405296 | 2.98888861786130  | 2.54810003806575  |
| H | -0.76944790982545 | 3.50743037894537  | 3.75172420992990  |
| C | -0.97057939504076 | 1.36404330149886  | 3.53834374351457  |
| H | -0.00830332586644 | 1.21253284006923  | 4.09035241681038  |
| H | -1.78552593816278 | 1.26137647339019  | 4.27759746115271  |
| C | -0.10533000709000 | 0.48915775840452  | 1.47780498414031  |
| H | -0.28293722656720 | -0.25547812010013 | 0.68011060180574  |
| H | 0.90739776500453  | 0.27697453972325  | 1.90726601673388  |
| C | -0.11397589385463 | 1.88626276956976  | 0.86692774965918  |
| H | 0.72418744784053  | 2.00010608446817  | 0.15541709594902  |
| H | -1.06322622213616 | 2.03967292256357  | 0.30534604052945  |
| C | -1.21658254533731 | -0.98922655643989 | 3.03351803144965  |
| H | -1.40527566535537 | -1.71250197213863 | 2.22034564755615  |
| H | -2.04780940183626 | -1.06151819751131 | 3.75690000093358  |
| H | -0.27646456495798 | -1.29331610147506 | 3.55631958668819  |
| C | 5.00765883601421  | 4.51251938336510  | 1.62216261253304  |
| H | 5.93172926993069  | 4.71014768425478  | 1.03370718654970  |
| H | 4.98623319593883  | 5.24665768927917  | 2.45032779815775  |
| C | 5.96656534302594  | 3.13851506935237  | 3.39851465405939  |
| H | 5.58987234157087  | 3.86209098542673  | 4.14409423398173  |
| H | 6.99575165166857  | 3.43779066147002  | 3.09753127504981  |
| C | 6.00066784060923  | 1.74216838546315  | 4.00946446239439  |
| H | 6.73134060011622  | 1.72756971747309  | 4.83843993891494  |
| H | 4.99922477944296  | 1.50983966607806  | 4.45300890678203  |
| C | 5.46331856696710  | 0.76019190802242  | 1.88692275608937  |
| H | 4.43316780901413  | 0.45659279359796  | 2.20497580031005  |
| H | 5.80067391389140  | 0.02597933715579  | 1.13227295083708  |

|    |                   |                   |                  |
|----|-------------------|-------------------|------------------|
| C  | 5.41007383552046  | 2.14356330880082  | 1.24695362218372 |
| H  | 6.39761253550955  | 2.37888755173063  | 0.78903866293193 |
| H  | 4.65022109030515  | 2.16591508352328  | 0.44443553397612 |
| C  | 6.52161462341152  | -0.58403427240073 | 3.59390991346350 |
| H  | 7.26586827777866  | -0.56633605963811 | 4.40954087992446 |
| H  | 6.87138215167555  | -1.29639682664967 | 2.82565006061847 |
| H  | 5.55987115252094  | -0.97069133825586 | 4.01234502949025 |
| N  | 0.02395667201446  | 2.92130991187115  | 1.90642255134521 |
| N  | -1.15281536471467 | 0.36050070163858  | 2.48884116155438 |
| N  | 5.05991927297928  | 3.17617418814345  | 2.23816371509117 |
| N  | 6.39506206778627  | 0.74593530603994  | 3.01285594362432 |
| O  | 2.27752367697766  | 4.00112845525950  | 4.49617367355055 |
| Bi | 2.48526924308085  | 2.74393868767708  | 3.00709537728405 |

**Table S13.** Cartesian coordinates (Å) of the cation of **5** (protons on the same pincer ligand).

109

Coordinates from ORCA-job Sb2O2\_2H\_cis\_1\_opt

|   |                   |                   |                  |
|---|-------------------|-------------------|------------------|
| C | 2.92806731772890  | 7.40628383499402  | 4.06774880774095 |
| C | 1.78727501898139  | 7.86585217964269  | 3.36252264984041 |
| C | 1.96327363866428  | 8.75179120218841  | 2.27844343315953 |
| H | 1.08640169573188  | 9.06320029232851  | 1.69674641126735 |
| C | 3.23171530679851  | 9.23113770610333  | 1.92438168254847 |
| H | 3.34559297001562  | 9.92890841122206  | 1.08698593906133 |
| C | 4.35388458163581  | 8.81015289722121  | 2.64884017513564 |
| H | 5.35000818907155  | 9.18467108946034  | 2.37998927114479 |
| C | 4.21290897629647  | 7.88799401272982  | 3.70440083062430 |
| C | 0.37855397695912  | 7.43619640035150  | 3.71169788373521 |
| H | -0.24274392419790 | 7.47549805661103  | 2.78790711694561 |
| H | 0.37934911825982  | 6.38968261381357  | 4.05731370215141 |
| C | -1.55099636435349 | 7.68523547042749  | 5.13315116314988 |
| H | -1.42511255732220 | 6.63375148574018  | 5.44717570529163 |
| H | -2.24485980470222 | 7.67213320323133  | 4.25436425126123 |
| C | -2.20577979221741 | 8.44474197434710  | 6.28106963549042 |
| H | -3.20867274473510 | 8.04813689579848  | 6.51044703909237 |
| H | -1.58737792119182 | 8.41693260826368  | 7.19391059043094 |
| C | -1.00643602134456 | 10.47540065202882 | 5.52904675293576 |
| H | -0.38635223901221 | 10.44232760026334 | 6.44046560426467 |
| H | -1.15657571773823 | 11.52562659066785 | 5.22906029782558 |
| C | -0.39622070333241 | 9.65250224741771  | 4.40280070020742 |
| H | -1.01964006116234 | 9.76555368049370  | 3.47934075600403 |
| H | 0.59333627750226  | 10.07949647435982 | 4.16400284013128 |
| C | -3.04541886946671 | 10.70922040309300 | 6.98857925993584 |
| H | -2.42868606353840 | 10.68118234581482 | 7.89932256240932 |
| H | -4.03401923889837 | 10.26872923733174 | 7.18879393876270 |
| H | -3.15998420865434 | 11.74767420312790 | 6.64225987876292 |
| C | 5.46848117106682  | 7.34988692251238  | 4.35720906804073 |
| H | 5.74600857754460  | 6.39403294118515  | 3.87884196921932 |
| H | 6.31882427365679  | 8.04792686086326  | 4.21475105783072 |
| C | 5.29365375960053  | 8.26485977800416  | 6.61461782872624 |
| H | 4.46566719062440  | 8.91801542192064  | 6.28509905299223 |

|   |                   |                   |                   |
|---|-------------------|-------------------|-------------------|
| H | 6.23509226199274  | 8.83767964044366  | 6.45244465397272  |
| C | 5.11553716983547  | 7.95553315112529  | 8.09562541703342  |
| H | 5.17773979958308  | 8.87286899384968  | 8.70368779324415  |
| H | 4.15423131551630  | 7.45272197298410  | 8.29799656018040  |
| C | 6.16137968350537  | 5.74588989130558  | 7.72694557368036  |
| H | 5.19355616471014  | 5.25927615338760  | 7.93707960458509  |
| H | 6.97384830369107  | 5.08411183210277  | 8.06893921206259  |
| C | 6.31453155184223  | 6.08349174989675  | 6.25166384540674  |
| H | 7.33689443874053  | 6.47301579424883  | 6.04648157690431  |
| H | 6.17862841320891  | 5.15109553964118  | 5.67322791735064  |
| C | 6.10199707680172  | 6.71300547688064  | 10.04752504929395 |
| H | 6.17090267345012  | 7.65927402936348  | 10.60540913429321 |
| H | 6.93112729318442  | 6.04787189579134  | 10.33316758190612 |
| H | 5.13803169728616  | 6.22222643275995  | 10.24925862656102 |
| C | 2.24244789807571  | 4.66000953414187  | 1.95901104856354  |
| C | 0.88605795036315  | 4.82621822936809  | 1.61575415907559  |
| C | 0.55060853225755  | 5.70800044267288  | 0.56954435820906  |
| H | -0.49916728495587 | 5.82427020406147  | 0.26981562246314  |
| C | 1.55593160603299  | 6.39678902958703  | -0.12926366401598 |
| H | 1.28533199210741  | 7.06342202052544  | -0.95653322948401 |
| C | 2.91057210346014  | 6.18052544359730  | 0.17760840538881  |
| H | 3.69358511587861  | 6.67130740859398  | -0.41364704445532 |
| C | 3.25493202704430  | 5.29950846283294  | 1.21561275642996  |
| C | -0.17270673103689 | 4.03025926247089  | 2.34680764813431  |
| H | -0.46954988462762 | 4.55958464726208  | 3.27085504567270  |
| H | -1.08281966675421 | 3.92559145682110  | 1.71866573128320  |
| C | -0.50802817198007 | 2.08696506915481  | 3.78977807136425  |
| H | -1.54728163726570 | 1.97712265822907  | 3.41291493816041  |
| H | -0.53622076305522 | 2.76081768417588  | 4.66590018961660  |
| C | 0.03035732207301  | 0.71547866313999  | 4.18579254100246  |
| H | 1.03351193313076  | 0.83547197327453  | 4.67609929418473  |
| H | -0.64468474572125 | 0.26480378272672  | 4.93494754808061  |
| C | 0.95942436832346  | 0.42432046057519  | 2.00320582175426  |
| H | 0.97440255398142  | -0.23610677343538 | 1.11799226624140  |
| H | 2.02142351937791  | 0.50527573807906  | 2.36165762613312  |
| C | 0.45632097505357  | 1.80139167807958  | 1.58298267161720  |
| H | 1.14218525768709  | 2.26004272002324  | 0.84762139089639  |
| H | -0.53741151931980 | 1.69940230180993  | 1.09811157082961  |
| C | 0.45202734482803  | -1.53007833246783 | 3.35237352443921  |
| H | 0.41308462718081  | -2.15233906961261 | 2.44262924380428  |
| H | -0.27618469870991 | -1.93837075737861 | 4.07305464032365  |
| H | 1.47190656782671  | -1.61875389129813 | 3.79526435823018  |
| C | 4.68634914131996  | 4.96063265965320  | 1.55448523001203  |
| H | 5.36887739410341  | 5.16326429468712  | 0.70609398572692  |
| H | 5.01630441537477  | 5.56718764870956  | 2.41265999464271  |
| C | 6.08859972175361  | 3.27640415419484  | 2.66166103697527  |
| H | 6.11517163885409  | 3.91621306607199  | 3.56079122578566  |
| H | 6.92101837781634  | 3.55865360514635  | 1.98652135871023  |
| C | 6.21260229503643  | 1.80640267450821  | 3.04846263344532  |
| H | 7.20269285916754  | 1.64061642910070  | 3.50941255099806  |
| H | 5.44447481338781  | 1.56488761068369  | 3.83172912649364  |

|    |                   |                   |                  |
|----|-------------------|-------------------|------------------|
| C  | 4.79700163209532  | 1.16786710625129  | 1.23322472949099 |
| H  | 3.94217820377554  | 0.88281333577944  | 1.90490748019908 |
| H  | 4.72181493522146  | 0.52517044439555  | 0.33835988500008 |
| C  | 4.64050045606341  | 2.62204323755050  | 0.80803609377987 |
| H  | 5.41062234910575  | 2.87791751547267  | 0.05369420391821 |
| H  | 3.64825739221070  | 2.79975457973507  | 0.35763296586827 |
| C  | 6.35048451256200  | -0.45475591785486 | 2.16203162471196 |
| H  | 7.36608361195487  | -0.56116242401299 | 2.57861367435830 |
| H  | 6.30703499892925  | -1.03538210083505 | 1.22555960817828 |
| H  | 5.62550063076158  | -0.89689344185186 | 2.88409902243166 |
| N  | 5.28618178504920  | 7.03912678032399  | 5.79573158574478 |
| N  | 6.19467111843833  | 7.00415848644742  | 8.57318932141466 |
| N  | -0.24376011038167 | 8.24798587078576  | 4.78875053252787 |
| N  | -2.35904741554969 | 9.90817523201206  | 5.91673353968535 |
| N  | 0.34371189487178  | 2.71026971671665  | 2.75322669362096 |
| N  | 0.09764147875358  | -0.15204826587132 | 3.02061420963497 |
| N  | 4.79596004038455  | 3.53810916628446  | 1.97637630923553 |
| N  | 6.08022469181852  | 0.95409170494824  | 1.87881430420852 |
| O  | 1.36315248009512  | 4.67634626269843  | 4.89461730682303 |
| O  | 4.04199560737732  | 4.62534505223690  | 4.63108283260154 |
| Sb | 2.94461761810498  | 5.90366964842947  | 5.65003262608638 |
| Sb | 2.86724841555951  | 3.29010950210183  | 3.49470761901065 |
| H  | 0.96806236808505  | 4.16731156837264  | 5.62929671315583 |
| H  | -2.95289538078842 | 9.94697088519038  | 5.07152536893694 |
| H  | 7.10599826781270  | 7.46275575458721  | 8.40607031504811 |

**Table S14.** Cartesian coordinates (Å) of the cation of **5** (protons on different pincer ligands).

109

Coordinates from ORCA-job Sb2O2\_2H\_cis\_2\_opt

|   |                   |                   |                  |
|---|-------------------|-------------------|------------------|
| C | 2.88346128155480  | 7.54141416094212  | 3.62338204856173 |
| C | 1.79431664075455  | 7.97817058404623  | 2.84098892550574 |
| C | 2.04058432525819  | 8.70405920985671  | 1.66184900406406 |
| H | 1.19963976087170  | 9.05084066648567  | 1.04833363370302 |
| C | 3.35842962097737  | 9.00584881816030  | 1.27782305973464 |
| H | 3.54204305184989  | 9.58308416650126  | 0.36427531922435 |
| C | 4.43849672104908  | 8.61450353857976  | 2.08496559351817 |
| H | 5.46116014556461  | 8.89909666321898  | 1.80609308644150 |
| C | 4.20540786418197  | 7.88303496314813  | 3.26540871441929 |
| C | 0.38741522698973  | 7.69918223682247  | 3.31926065393792 |
| H | -0.35360236283459 | 8.25495299491163  | 2.70529522411035 |
| H | 0.16553930852595  | 6.62175764938582  | 3.22677395875833 |
| C | -0.97871262768361 | 7.54049395614275  | 5.34268852526996 |
| H | -1.04137801911299 | 6.45128311302666  | 5.16828838110727 |
| H | -1.87999286360659 | 8.00125155790837  | 4.86980013336239 |
| C | -0.99906006339593 | 7.78454532858813  | 6.84758139438285 |
| H | -1.94931560114981 | 7.45958570940647  | 7.30233240215882 |
| H | -0.15949364622559 | 7.27121701310619  | 7.34708481201624 |
| C | 0.44536205896342  | 9.76893247483178  | 6.49325093583827 |
| H | 1.27925497333527  | 9.25215198320750  | 7.00074190001607 |
| H | 0.51552785604303  | 10.85128221367093 | 6.69048505961366 |

|   |                   |                   |                   |
|---|-------------------|-------------------|-------------------|
| C | 0.42395307775390  | 9.46930311774019  | 5.00189396616873  |
| H | -0.37898144348582 | 10.06439820131575 | 4.50329619985901  |
| H | 1.38069846352503  | 9.80559697648640  | 4.56436528356972  |
| C | -0.88074614378494 | 9.56450271949811  | 8.61983326655456  |
| H | -0.04497528178605 | 9.04833445340765  | 9.11570571241799  |
| H | -1.83992740159841 | 9.20802127521365  | 9.02508765987960  |
| H | -0.79297930411343 | 10.65199581696231 | 8.76509436405787  |
| C | 5.34053403097923  | 7.45028141012486  | 4.16828992349084  |
| H | 5.69031014340378  | 6.43812765049680  | 3.89686148643510  |
| H | 6.20850377747544  | 8.13290851987786  | 4.08368649265401  |
| C | 4.76853595434150  | 8.73908023483592  | 6.16898053350914  |
| H | 4.02595118274702  | 9.30265802677997  | 5.57582221512775  |
| H | 5.74453897632846  | 9.25307875981196  | 6.06811393281341  |
| C | 4.37690722172767  | 8.68368994445835  | 7.64225319488689  |
| H | 4.37065112798483  | 9.71376921480013  | 8.04234953336733  |
| H | 3.32411422253345  | 8.28908425794124  | 7.74170138705580  |
| C | 5.39944290856363  | 6.52877780986370  | 7.86512118568057  |
| H | 4.42474729855721  | 5.98326051115302  | 7.97243822841402  |
| H | 6.14686767562540  | 5.95656636960455  | 8.44209448473946  |
| C | 5.82175181995909  | 6.54179318593623  | 6.40056351636056  |
| H | 6.84484176223465  | 6.95627763360159  | 6.30853890758520  |
| H | 5.80561553613008  | 5.52087401039594  | 5.98172127344398  |
| C | 5.09678653058349  | 7.92876660946495  | 9.83594296509815  |
| H | 5.14086880380872  | 8.97347452104321  | 10.18714539038270 |
| H | 5.89080942366795  | 7.36582162109998  | 10.35388093548661 |
| H | 4.11215093227012  | 7.49543249114352  | 10.13276832804351 |
| C | 2.15655556680455  | 4.60972778065754  | 1.83530714444565  |
| C | 0.84669276368917  | 4.76834036086099  | 1.32933709079899  |
| C | 0.65180099653431  | 5.52514634185053  | 0.15723711991293  |
| H | -0.36022468802423 | 5.64679730387975  | -0.25066049144814 |
| C | 1.74722396936383  | 6.09066119407811  | -0.51742460579873 |
| H | 1.58431045511087  | 6.66831833775143  | -1.43464165946649 |
| C | 3.05306867305289  | 5.86364595406646  | -0.05585646187521 |
| H | 3.91037509094287  | 6.25330823138646  | -0.61838596415721 |
| C | 3.25930013762500  | 5.11542329567033  | 1.11683292388423  |
| C | -0.31490241315967 | 4.05843595261855  | 1.99295205223870  |
| H | -0.51190129226566 | 4.49639306770789  | 2.98888071071133  |
| H | -1.23507355624201 | 4.16449137747030  | 1.37797252620346  |
| C | -0.95599938833128 | 1.95733005101508  | 3.07464017364005  |
| H | -1.97321010069044 | 1.93050172044189  | 2.61252889448886  |
| H | -1.05525003711539 | 2.51047014041690  | 4.02570911957613  |
| C | -0.49685805339844 | 0.54005109255254  | 3.40097835850833  |
| H | 0.47362743789274  | 0.54481573360409  | 3.92607566544260  |
| H | -1.23971184488201 | -0.00031286379796 | 4.01054324032413  |
| C | 0.69099889833229  | 0.48692414858144  | 1.22591158922773  |
| H | 0.78604761240909  | -0.08832064672325 | 0.29029933100694  |
| H | 1.65964994282304  | 0.48387081811753  | 1.75628431341228  |
| C | 0.20179181945113  | 1.90415379777516  | 0.96775888250471  |
| H | 0.95614151631054  | 2.42693314432962  | 0.35336836348234  |
| H | -0.73795777894603 | 1.88207596590725  | 0.36401554707041  |
| C | 0.13499190791941  | -1.67197632892776 | 2.38775175004167  |

|    |                   |                   |                  |
|----|-------------------|-------------------|------------------|
| H  | 0.22959220912324  | -2.20074287487145 | 1.42707959700400 |
| H  | -0.62756820931840 | -2.16178382305666 | 3.01223095071383 |
| H  | 1.10300798377520  | -1.66201371139610 | 2.91088850341392 |
| C  | 4.64222307236512  | 4.79740017518728  | 1.63341702282665 |
| H  | 5.40068716383961  | 4.84262250663308  | 0.82801994992813 |
| H  | 4.92380879456265  | 5.52738177455392  | 2.40768494735934 |
| C  | 5.88728625553068  | 3.27208536296648  | 3.10519370487502 |
| H  | 5.86596863492251  | 4.04172765576668  | 3.89451027002292 |
| H  | 6.77821267226220  | 3.42436891545547  | 2.46456429145979 |
| C  | 5.92230893179617  | 1.87891362757883  | 3.72157394402332 |
| H  | 6.86701694895521  | 1.76082366065740  | 4.28058040204548 |
| H  | 5.09039954088336  | 1.77957687821192  | 4.46777807412886 |
| C  | 4.63790315833372  | 0.99633197624195  | 1.90501741006714 |
| H  | 3.71404066567938  | 0.83312927015898  | 2.53455349190906 |
| H  | 4.62554899294749  | 0.22948062516288  | 1.10931938505253 |
| C  | 4.56908198721646  | 2.37543085381436  | 1.25732775526758 |
| H  | 5.40708461177887  | 2.49031085548476  | 0.54192943457680 |
| H  | 3.62535658411981  | 2.50840922694809  | 0.69903575228864 |
| C  | 6.04205750039842  | -0.49882643441869 | 3.20406562083839 |
| H  | 7.01036725205558  | -0.56109726435401 | 3.72763154772880 |
| H  | 6.06594571256037  | -1.21631897647355 | 2.36650773085339 |
| H  | 5.24092364587889  | -0.80958325726266 | 3.91629826201475 |
| N  | 4.88926293754214  | 7.37129362768374  | 5.58343352715587 |
| N  | 5.32201980777651  | 7.88378497359071  | 8.39370806584973 |
| N  | 0.26567533316455  | 8.03288253317297  | 4.75669103296786 |
| N  | -0.82593645626055 | 9.26117360399961  | 7.14747906107518 |
| N  | 0.02108901398335  | 2.63520484305560  | 2.22508262905017 |
| N  | -0.28276714704920 | -0.25080644092124 | 2.12535147815940 |
| N  | 4.66011224253450  | 3.45543160601289  | 2.28058666877209 |
| N  | 5.84617962013852  | 0.85357343313306  | 2.68931208898818 |
| O  | 1.06454452133626  | 4.85628602479179  | 4.62911048840402 |
| O  | 3.76037267010153  | 4.85405786218050  | 4.62990083413117 |
| Sb | 2.69721261216539  | 6.36718380142244  | 5.42185111039392 |
| Sb | 2.63468396110954  | 3.50819830322289  | 3.63407708218664 |
| H  | 0.74939274512683  | 4.41362753939604  | 5.44121635953869 |
| H  | -1.61452543275383 | 9.75661860933586  | 6.69871832661267 |
| H  | -1.18972827813115 | -0.28022325536239 | 1.63015947831323 |

**Table S15.** Cartesian coordinates (Å) of the cation [(RSb)<sub>2</sub>(μ-O)(μ-OH)]<sup>+</sup>, *syn* isomer.

107

Coordinates from ORCA-job Sb2O2\_H\_cis\_opt

|   |                  |                  |                  |
|---|------------------|------------------|------------------|
| C | 2.94351887297241 | 7.60407454735913 | 3.51413658462189 |
| C | 1.89976899543372 | 8.08043061725269 | 2.69823714527384 |
| C | 2.20834564457602 | 8.81905545171249 | 1.54195186950740 |
| H | 1.39859024620199 | 9.19175066472726 | 0.90211153036645 |
| C | 3.54595738669049 | 9.09489950802152 | 1.21623853423509 |
| H | 3.77995264727827 | 9.67876806935267 | 0.31824838163612 |
| C | 4.58318857440285 | 8.66381685482509 | 2.05951500479921 |
| H | 5.62429284239817 | 8.92433353814864 | 1.82772639944590 |
| C | 4.28555498807081 | 7.91876136915858 | 3.21573484734544 |

|   |                   |                   |                   |
|---|-------------------|-------------------|-------------------|
| C | 0.47202167503428  | 7.79903493740322  | 3.10740638375257  |
| H | -0.22602102623970 | 8.50787683143406  | 2.61008401407627  |
| H | 0.19578671851248  | 6.78001972607758  | 2.78443054310876  |
| C | -0.94889542636859 | 7.27942470784098  | 5.02149120755130  |
| H | -1.01931896872511 | 6.24801825194725  | 4.63486074291310  |
| H | -1.79841797715787 | 7.86769340871330  | 4.60837321082504  |
| C | -1.02362597393892 | 7.28402893656627  | 6.54483452111075  |
| H | -2.00408562456994 | 6.88840894016397  | 6.86648153286018  |
| H | -0.23625589744840 | 6.59732732022614  | 6.95335310557951  |
| C | 0.39543838920203  | 9.21762569978011  | 6.62068323688636  |
| H | 1.27049606184669  | 8.66297563448131  | 7.05072672265643  |
| H | 0.46281803011092  | 10.25828058760669 | 6.98655596252092  |
| C | 0.49661532883633  | 9.21245581879463  | 5.09897573600766  |
| H | -0.28228143139973 | 9.88088832501420  | 4.66941266367213  |
| H | 1.48234406511130  | 9.59607928165809  | 4.78044525662057  |
| C | -1.02803320043241 | 8.70366414309220  | 8.50932793998749  |
| H | -0.25029279753018 | 8.11840328505233  | 9.05775634701608  |
| H | -2.01901081190678 | 8.30989407391279  | 8.79426770646452  |
| H | -0.96860522485168 | 9.75334033874886  | 8.84558701727492  |
| C | 5.37590462292476  | 7.43584283690384  | 4.14790444080733  |
| H | 5.67789124903461  | 6.40798123450996  | 3.87648057544297  |
| H | 6.27858689969759  | 8.07782281223986  | 4.07654423369875  |
| C | 4.80268910276723  | 8.72350366961903  | 6.14386338329622  |
| H | 4.09453079773015  | 9.32062022346031  | 5.54148082576957  |
| H | 5.79733963645883  | 9.21368165087116  | 6.08864908073505  |
| C | 4.34949066350370  | 8.65456283923755  | 7.59797181726984  |
| H | 4.35914747703705  | 9.67513634477516  | 8.02150036412811  |
| H | 3.28903409764573  | 8.29448996487566  | 7.64703832707341  |
| C | 5.27624716701298  | 6.45696279269862  | 7.81513058741464  |
| H | 4.27264953511648  | 5.96219155650922  | 7.86794524204227  |
| H | 5.97267536978305  | 5.83678692575113  | 8.40750509768412  |
| C | 5.75245725740524  | 6.48521357682512  | 6.36735190098512  |
| H | 6.80274549089296  | 6.84293298243970  | 6.32700914117984  |
| H | 5.69615896373274  | 5.47422562018607  | 5.92611904270430  |
| C | 4.90256223964290  | 7.80416866893286  | 9.79546640193197  |
| H | 4.94781177315775  | 8.83407810019241  | 10.18970492718062 |
| H | 5.63298651676079  | 7.19311355869370  | 10.35317615235177 |
| H | 3.88221919673844  | 7.39825946257018  | 9.99776753899428  |
| C | 2.20067330259872  | 4.69870014248419  | 1.65238857575827  |
| C | 0.90698647536658  | 4.89101990938171  | 1.12457646843720  |
| C | 0.74752210265115  | 5.66981336485021  | -0.03845194553882 |
| H | -0.25591381579537 | 5.81744137588868  | -0.45901679661161 |
| C | 1.86469878334284  | 6.22802897577135  | -0.67960598776273 |
| H | 1.73042012045191  | 6.82706679485720  | -1.58800754057414 |
| C | 3.15671165441225  | 5.97700801854256  | -0.19080113315714 |
| H | 4.03359596184320  | 6.37214000681633  | -0.71875505052313 |
| C | 3.32578959499039  | 5.20565941020286  | 0.97113679762283  |
| C | -0.28575129028708 | 4.24064408768886  | 1.79336238562375  |
| H | -0.62129264929957 | 4.86170156702498  | 2.64480089017072  |
| H | -1.13644097733008 | 4.16633332500707  | 1.07996037964969  |
| C | -0.93919933006202 | 2.43528308841010  | 3.29559847418340  |

|    |                   |                   |                  |
|----|-------------------|-------------------|------------------|
| H  | -1.92778640063221 | 2.32267651224087  | 2.79632858939604 |
| H  | -1.05140453861313 | 3.18680332114886  | 4.09846662013996 |
| C  | -0.51337405373981 | 1.09272476035759  | 3.88144264262519 |
| H  | 0.42015183622984  | 1.23398983273347  | 4.48569239848137 |
| H  | -1.29825767404402 | 0.72653875775482  | 4.56772779672578 |
| C  | 0.68632166550278  | 0.58042411993309  | 1.87064239648452 |
| H  | 0.78548729778745  | -0.15892915446222 | 1.05524835773507 |
| H  | 1.69272719132404  | 0.66900206210539  | 2.35607234691291 |
| C  | 0.29055054353594  | 1.92909584255105  | 1.27813472555755 |
| H  | 1.08788273513919  | 2.30286768441231  | 0.61067576643509 |
| H  | -0.63313978691303 | 1.81073226857736  | 0.66850425462461 |
| C  | -0.01246991346290 | -1.21479917354526 | 3.33561624467184 |
| H  | 0.06255594990689  | -1.93297139687352 | 2.50071482611543 |
| H  | -0.82353068735874 | -1.55228789256615 | 4.00385936439520 |
| H  | 0.94609279015771  | -1.24620713116097 | 3.90844630939059 |
| C  | 4.69275864560599  | 4.88255381832190  | 1.52427002039522 |
| H  | 5.47943951664945  | 4.98255979989731  | 0.74823907000785 |
| H  | 4.92339081173262  | 5.58667173237109  | 2.33848526964323 |
| C  | 5.89079221608074  | 3.33362183579356  | 2.98885250675718 |
| H  | 5.81600710223697  | 4.07877324059315  | 3.79979547404448 |
| H  | 6.81902996122169  | 3.51140356180626  | 2.40605682979239 |
| C  | 5.90957111200433  | 1.92591431023667  | 3.57264794381958 |
| H  | 6.82729879763444  | 1.79906647276591  | 4.17466908627522 |
| H  | 5.04092732771528  | 1.80430953007376  | 4.26968109668636 |
| C  | 4.70576647568307  | 1.08603624519596  | 1.68173748776621 |
| H  | 3.76592204797432  | 0.91018624289303  | 2.26759942395300 |
| H  | 4.72249142973493  | 0.33532093007065  | 0.87114513787004 |
| C  | 4.66485260609180  | 2.47939454393923  | 1.06565461468017 |
| H  | 5.52879979894578  | 2.61076694860642  | 0.38071753080099 |
| H  | 3.73996547592053  | 2.61914869069566  | 0.47816535600616 |
| C  | 6.01554864512056  | -0.43490137060943 | 3.03402696009777 |
| H  | 6.95250659620578  | -0.52934627276462 | 3.60957980841153 |
| H  | 6.05550458675777  | -1.15365524664661 | 2.19734706386804 |
| H  | 5.16715311544306  | -0.72286701918699 | 3.70048723591472 |
| N  | 4.89402833476748  | 7.36945212894237  | 5.54426204837590 |
| N  | 5.24229359669026  | 7.80450232650745  | 8.37654890331162 |
| N  | 0.33423162774431  | 7.84300532231892  | 4.57201605320239 |
| N  | -0.86898860060176 | 8.64008624116951  | 7.06157157235265 |
| N  | 0.07050608186410  | 2.92561814594071  | 2.34430282562458 |
| N  | -0.32018670485774 | 0.11276356791862  | 2.81712027784363 |
| N  | 4.71071659462546  | 3.52491686850159  | 2.11584498593288 |
| N  | 5.89250014702905  | 0.92200008792795  | 2.51233486717849 |
| O  | 1.04719962137264  | 4.91670159015159  | 4.40465447588701 |
| O  | 3.69451177028079  | 4.89473657652450  | 4.47926261552428 |
| Sb | 2.58399372011949  | 6.39293642895869  | 5.26958897972278 |
| Sb | 2.55622455857188  | 3.55422736551416  | 3.45740554709181 |
| H  | 0.61857067577956  | 4.48771072907462  | 5.16965643438626 |

**Table S16.** Cartesian coordinates (Å) of the cation [(RSb)<sub>2</sub>(μ-O)(μ-OH)]<sup>+</sup>, *anti* isomer.



Coordinates from ORCA-job Sb2O2\_H\_trans\_opt

|   |                  |                   |                   |
|---|------------------|-------------------|-------------------|
| C | 6.83201184511707 | 7.86372890285205  | 7.75195528552886  |
| C | 6.89374654737959 | 6.46534756558114  | 7.58405492679143  |
| C | 7.46741302504105 | 5.93635914865136  | 6.41116006548984  |
| H | 7.50940748245027 | 4.84843567259303  | 6.26992526585954  |
| C | 7.96941847381771 | 6.79087966123400  | 5.41698781264963  |
| H | 8.40863217658368 | 6.36941358550406  | 4.50510304087195  |
| C | 7.87519176306360 | 8.18414076317555  | 5.57044204071200  |
| H | 8.23339464857483 | 8.85159741414541  | 4.77599365007119  |
| C | 7.30151982131179 | 8.72218770910802  | 6.73562355174499  |
| C | 7.14546221153852 | 10.21235165523622 | 6.93969253427212  |
| H | 7.94003052389720 | 10.58243795299893 | 7.61367105990340  |
| H | 7.21449861375866 | 10.76347739973283 | 5.97906199662409  |
| C | 4.70035206994251 | 10.23496455368343 | 6.72027246047207  |
| H | 4.74303776271868 | 9.18074421427090  | 6.39475068759311  |
| H | 4.78300900497018 | 10.87605287405414 | 5.81745199637279  |
| C | 3.38648498451349 | 10.51944025675219 | 7.43963516139842  |
| H | 2.55025835223722 | 10.37027040183857 | 6.73295391825407  |
| H | 3.24817726362794 | 9.77753994045226  | 8.26870676001198  |
| C | 4.47661523753784 | 12.13868647405328 | 8.83295216491174  |
| H | 4.41887587587765 | 11.49943654556745 | 9.75255530178410  |
| H | 4.44398832075402 | 13.19191025787949 | 9.16691015341338  |
| C | 5.79904828237974 | 11.88226384210166 | 8.11932595290196  |
| H | 5.91406324903130 | 12.59608213321922 | 7.27651120521690  |
| H | 6.64890494328569 | 12.01021800244272 | 8.81112358470967  |
| C | 2.07189651576543 | 12.21070201433862 | 8.56504506960605  |
| H | 1.86087555979923 | 11.58349945876478 | 9.46481435851746  |
| H | 1.25306688383498 | 12.06047380511567 | 7.84046744428408  |
| H | 2.06363339720837 | 13.27047365410311 | 8.87356698522225  |
| C | 6.35595050370706 | 5.54851441522739  | 8.66180257724858  |
| H | 6.14897955973351 | 4.53803818049217  | 8.24502740186585  |
| H | 7.12571720141596 | 5.43166077894101  | 9.44817247730461  |
| C | 4.81876048885653 | 5.41445026658575  | 10.55364765436072 |
| H | 5.70990223018334 | 5.39708049502906  | 11.21006559264380 |
| H | 4.55162884044640 | 4.35333479239692  | 10.34863300877185 |
| C | 3.65157649527814 | 6.10786513797007  | 11.24816354662347 |
| H | 3.39233282802953 | 5.55823031511451  | 12.17188560832393 |
| H | 3.95965859251965 | 7.14238588347966  | 11.55116245772369 |
| C | 2.79512395749852 | 6.78457590464852  | 9.10450921897380  |
| H | 3.01330765127250 | 7.87275014859624  | 9.25597320150746  |
| H | 1.91178427686477 | 6.72079467127808  | 8.44350680089904  |
| C | 3.98655712730444 | 6.12512853824463  | 8.41411911559735  |
| H | 3.72324071349852 | 5.08569791358506  | 8.11660461402826  |
| H | 4.25021320689751 | 6.68068680816969  | 7.49612136452431  |
| C | 1.31934012374547 | 6.71170754289474  | 11.02039275683113 |
| H | 1.07878971663632 | 6.14580308582890  | 11.93725217758766 |
| H | 0.44747949744467 | 6.65379685773303  | 10.34605791027177 |
| H | 1.47290201605441 | 7.78191026173389  | 11.30118312170067 |
| N | 5.85523991152500 | 10.49585960843410 | 7.61290318583717  |
| N | 3.34959423619415 | 11.88981939368462 | 7.93908755744234  |
| N | 5.16143783898483 | 6.11625078893461  | 9.30829026042794  |

|    |                   |                   |                   |
|----|-------------------|-------------------|-------------------|
| N  | 2.48552051380088  | 6.12543463692476  | 10.37024023969150 |
| O  | 7.47149004948341  | 9.99560065906985  | 9.98482611746185  |
| Sb | 5.91535132032785  | 8.78320652150478  | 9.47967759827038  |
| C  | 6.27413923337489  | 9.79820212877377  | 12.79780506295226 |
| C  | 5.73554509828954  | 11.09263679867107 | 12.62679289660749 |
| C  | 4.45523242342018  | 11.39297722585531 | 13.12507952376488 |
| H  | 4.03923598577751  | 12.40095230903589 | 12.99770676750926 |
| C  | 3.72046001321976  | 10.40975516836890 | 13.80855503665935 |
| H  | 2.72350919544834  | 10.64434714288180 | 14.19980604316283 |
| C  | 4.28456528528324  | 9.14580333122870  | 14.04231594453240 |
| H  | 3.73373071537503  | 8.40185806216285  | 14.63288160076853 |
| C  | 5.56753864146440  | 8.83616061067288  | 13.54892078679549 |
| C  | 6.19105039401764  | 7.48482908746844  | 13.84402289139312 |
| H  | 5.88938544429019  | 6.74419108659998  | 13.07387724009707 |
| H  | 5.78629971964393  | 7.08134076304294  | 14.79955194788624 |
| C  | 8.13728393018581  | 8.21640907272347  | 15.09609077082468 |
| H  | 7.69710979684669  | 9.22915159627001  | 15.13643376682997 |
| H  | 7.78792560078875  | 7.65799752828943  | 15.99306054487557 |
| C  | 9.65987759224076  | 8.30005897183895  | 15.10977570751700 |
| H  | 9.98756889464388  | 8.74853746741647  | 16.06519383884334 |
| H  | 10.00199936232283 | 8.98678736250274  | 14.29232883883446 |
| C  | 9.79905617719599  | 6.33748992917514  | 13.74304603624181 |
| H  | 10.12843546972506 | 6.90355615750942  | 12.83493593178288 |
| H  | 10.24144547150402 | 5.32715403518387  | 13.67810901923562 |
| C  | 8.27871116458437  | 6.21967548590350  | 13.73513771711338 |
| H  | 7.95331547182664  | 5.54975234353227  | 14.56216970832806 |
| H  | 7.94919075681464  | 5.77070694484938  | 12.77983555262968 |
| C  | 11.70769365118743 | 7.01204652150690  | 15.07702584543888 |
| H  | 12.18408947301683 | 7.61611272254633  | 14.26753823488318 |
| H  | 12.00248977159654 | 7.44496434589612  | 16.04866200539482 |
| H  | 12.11157375502396 | 5.98632666967603  | 15.02388990703504 |
| C  | 6.56537569665033  | 12.13052079938885 | 11.90392363067836 |
| H  | 6.27499576872755  | 13.15807994444843 | 12.20714927445286 |
| H  | 6.40355150671625  | 12.03490912492605 | 10.81763150029789 |
| C  | 8.82794451290171  | 12.62096686285260 | 11.12493181205206 |
| H  | 8.54898955248519  | 12.22018126655098 | 10.13456791499356 |
| H  | 8.59827783571354  | 13.70698752350788 | 11.15779599979499 |
| C  | 10.31446138319618 | 12.40214317340488 | 11.38184720405392 |
| H  | 10.89552141805444 | 12.99142670588651 | 10.65000154262079 |
| H  | 10.56627416255118 | 11.32429629802576 | 11.20762296415159 |
| C  | 9.90257136688763  | 12.08250804313826 | 13.71802262839774 |
| H  | 10.13525227261724 | 10.98637697093043 | 13.68175384458372 |
| H  | 10.17199089248391 | 12.43329245151088 | 14.73058880108343 |
| C  | 8.40822003674982  | 12.29362889241594 | 13.50339452594967 |
| H  | 8.15586827419664  | 13.36196251252132 | 13.67147355012268 |
| H  | 7.82255420351457  | 11.68805673972555 | 14.21797686525611 |
| C  | 12.11158906247100 | 12.73588390281853 | 12.97400294757251 |
| H  | 12.65334781243032 | 13.35496633972444 | 12.23837669667178 |
| H  | 12.34426351446486 | 13.12172551429565 | 13.98157851504700 |
| H  | 12.49967077205270 | 11.69137958218744 | 12.90250614853015 |
| N  | 7.65738470987397  | 7.54989538161429  | 13.86793662097916 |

|    |                   |                   |                   |
|----|-------------------|-------------------|-------------------|
| N  | 10.25302051768262 | 6.97545233893852  | 14.97582510591502 |
| N  | 8.00911320996515  | 11.90575930010878 | 12.13020705221060 |
| N  | 10.67569755903193 | 12.82663405924355 | 12.73130634887297 |
| O  | 7.24281592898736  | 7.59562615849619  | 10.85001410246640 |
| Sb | 8.16144269951332  | 9.38669305921836  | 11.78587423356984 |
| H  | 6.74080530325006  | 7.03793062758508  | 11.47215956662952 |

**Table S17.** Cartesian coordinates (Å) of mononuclear form of **6**.

56

Coordinates from ORCA-job SbO2CO\_opt

|   |                   |                   |                   |
|---|-------------------|-------------------|-------------------|
| C | 2.64375172266579  | 4.42124600656431  | 1.23290728760688  |
| C | 1.42936762976542  | 4.74617718983395  | 0.59708364517401  |
| C | 1.45015837933832  | 5.44755315894644  | -0.62297796939319 |
| H | 0.50649516813605  | 5.69519378477644  | -1.12700325834639 |
| C | 2.67550867201708  | 5.82864936602720  | -1.19475067549401 |
| H | 2.68828910486118  | 6.36902388289073  | -2.14914581545572 |
| C | 3.88489817616385  | 5.51182148549105  | -0.55393866947504 |
| H | 4.84124568768263  | 5.81003788595558  | -1.00375285979440 |
| C | 3.87345240808234  | 4.81016715782791  | 0.66605915766322  |
| C | 0.13310520058644  | 4.37393388884203  | 1.28442618144634  |
| H | -0.07484957970919 | 5.11869429995978  | 2.07529982503947  |
| H | -0.71869390545887 | 4.38329483518627  | 0.56930118839501  |
| C | -0.81875021892139 | 2.85174805938017  | 2.94609878715464  |
| H | -1.81419968826409 | 2.89680746409172  | 2.45075412637461  |
| H | -0.75004529723973 | 3.66358580076403  | 3.69059569737210  |
| C | -0.65170393995084 | 1.49861209310787  | 3.62914485532661  |
| H | 0.28222347633821  | 1.50659227484800  | 4.24474300235974  |
| H | -1.49621019484982 | 1.33894253616675  | 4.32386094468790  |
| C | 0.43835393205763  | 0.61584196211289  | 1.67919767089658  |
| H | 0.40258192109923  | -0.19379182535709 | 0.92702152563887  |
| H | 1.44618347788587  | 0.56534983776019  | 2.16719001398909  |
| C | 0.28425056683122  | 1.95955876514541  | 0.97430982633784  |
| H | 1.13101885166512  | 2.13087079737489  | 0.28497770535878  |
| H | -0.65171811850376 | 1.95940792637574  | 0.37198150378364  |
| C | -0.55721430330674 | -0.89555657934386 | 3.28088238969096  |
| H | -0.60437713506600 | -1.68779941632114 | 2.51265864249294  |
| H | -1.41269672903267 | -1.03120060916937 | 3.96577677919806  |
| H | 0.38222116677044  | -1.03869163460116 | 3.86932783416481  |
| C | 5.14672871887439  | 4.50359445622417  | 1.42516076741139  |
| H | 6.03536108903696  | 4.55773961750619  | 0.75857900012107  |
| H | 5.27188698451040  | 5.25615445209260  | 2.22601050463779  |
| C | 6.07610437739224  | 3.02993612832567  | 3.14311150653751  |
| H | 5.92179691229936  | 3.83783159660048  | 3.87891374663575  |
| H | 7.09615574411459  | 3.12341147562791  | 2.70841468743062  |
| C | 5.93335265904051  | 1.67042156076581  | 3.81858140570675  |
| H | 6.73923428873954  | 1.55189923642771  | 4.56541404883526  |
| H | 4.96303723374056  | 1.63345656017676  | 4.37399266408516  |
| C | 5.01264935329512  | 0.73344409728851  | 1.80600545803495  |
| H | 3.97954743526710  | 0.62801206763363  | 2.22792164613277  |
| H | 5.13960758900497  | -0.07157197379551 | 1.05874072968302  |
| C | 5.14005007212125  | 2.08481833923666  | 1.11010193927979  |

|    |                   |                   |                  |
|----|-------------------|-------------------|------------------|
| H  | 6.10902185356418  | 2.13339947668799  | 0.56462045702750 |
| H  | 4.32808713273812  | 2.21391654974290  | 0.37152175975717 |
| C  | 5.97923631671738  | -0.72528571946667 | 3.47295632072035 |
| H  | 6.79655998048240  | -0.81822430100450 | 4.20962998416181 |
| H  | 6.11251183618401  | -1.51453376523683 | 2.71182225603621 |
| H  | 5.01353235697161  | -0.91425747010842 | 4.00303186379934 |
| N  | 0.25000475635308  | 3.06453680911967  | 1.95098737911328 |
| N  | -0.63709144378511 | 0.41332329606984  | 2.64606922696601 |
| N  | 5.05952718451046  | 3.18864817665025  | 2.08521451559630 |
| N  | 6.03338160064627  | 0.58569286430313  | 2.83987000598364 |
| O  | 3.66717662294440  | 4.80719839144983  | 4.14163382746368 |
| Sb | 2.62079901151064  | 3.31098866483823  | 3.08807864371395 |
| C  | 2.52491927606851  | 5.42974283622439  | 4.56093490451748 |
| O  | 1.44157032772465  | 4.75024437402506  | 4.07997357736511 |
| O  | 2.48056241528871  | 6.42826174495775  | 5.25159065505301 |

**Table S18.** Cartesian coordinates (Å) of dimers of **6**, *syn* isomer.

112

Coordinates from ORCA-job SbOCO2\_cis\_dim2\_opt

|   |                    |                    |                    |
|---|--------------------|--------------------|--------------------|
| C | -6.93290593504869  | -8.89577021850498  | -8.38704442622281  |
| C | -7.66057855674868  | -7.71086311170698  | -8.62659258838534  |
| C | -8.91868274072254  | -7.52976232568406  | -8.02238767684205  |
| H | -9.48057586654475  | -6.60364812892071  | -8.20389495905734  |
| C | -9.44099320906106  | -8.51644634662002  | -7.17043063985127  |
| H | -10.42016663330092 | -8.37026044999692  | -6.69785870663908  |
| C | -8.68881472407859  | -9.66686261113558  | -6.88489029832906  |
| H | -9.07505237276200  | -10.41829290886818 | -6.18347960303164  |
| C | -7.43080134936121  | -9.85851862469749  | -7.48525290298871  |
| C | -6.59396130522592  | -11.08056394079862 | -7.19273023770865  |
| H | -6.72305023110356  | -11.78456631329606 | -8.03638953801107  |
| H | -6.92852834184814  | -11.58113717630083 | -6.25727690684930  |
| C | -4.85525116516603  | -9.95068823360240  | -5.90322169060464  |
| H | -5.48478292507782  | -9.04210235203936  | -5.89929933171670  |
| H | -5.11048300011258  | -10.54552638646859 | -4.99706637813572  |
| C | -3.37923876569947  | -9.56875468604632  | -5.86592690342384  |
| H | -3.16378175395834  | -9.03530656568224  | -4.92147448410129  |
| H | -3.16407817181355  | -8.85369972095170  | -6.70132586426494  |
| C | -2.83016180300200  | -11.50840966871353 | -7.16694376493303  |
| H | -2.58592438457428  | -10.91705911449904 | -8.08427440165785  |
| H | -2.20096330898906  | -12.41687702076070 | -7.18764493933653  |
| C | -4.29872398601623  | -11.91401521893163 | -7.20871286787145  |
| H | -4.51689635682735  | -12.61111005952867 | -6.36858650649848  |
| H | -4.52561457525728  | -12.41534228121878 | -8.16462415303174  |
| C | -1.11698079556808  | -10.41183310530532 | -5.85464498582730  |
| H | -0.77196809141258  | -9.75282174308063  | -6.68882745106600  |
| H | -0.91962837540839  | -9.88965324235449  | -4.90133911477768  |
| H | -0.50785757299015  | -11.33284145837732 | -5.87355700167374  |
| C | -7.04559304691333  | -6.63864943985522  | -9.49806067634269  |
| H | -7.54479943815040  | -5.65818370237230  | -9.33049218159104  |
| H | -7.16722478149979  | -6.90982832215026  | -10.56213787875780 |
| C | -4.90499750345840  | -5.75786914037478  | -10.28244284220105 |

|    |                    |                    |                    |
|----|--------------------|--------------------|--------------------|
| H  | -5.08752493315101  | -6.23983978826514  | -11.25636236442848 |
| H  | -5.31282281832069  | -4.72179052194188  | -10.30728340789971 |
| C  | -3.40617788731868  | -5.71857140654062  | -10.01356071721630 |
| H  | -2.91926285390603  | -5.08469423070915  | -10.77653627880854 |
| H  | -2.99411990156397  | -6.74796582570839  | -10.13389607576648 |
| C  | -3.80736004512636  | -5.94228122568893  | -7.65813228738999  |
| H  | -3.41320878459297  | -6.99094216473672  | -7.61570012024676  |
| H  | -3.61621798833153  | -5.48533389837649  | -6.66921514872067  |
| C  | -5.31043171005444  | -5.98679779567522  | -7.90995340819829  |
| H  | -5.73374087997948  | -4.95998077897325  | -7.82810550380087  |
| H  | -5.80800816555390  | -6.61959622518081  | -7.15317130175570  |
| C  | -1.69877522713197  | -5.06038036582910  | -8.42946470000972  |
| H  | -1.22430474527338  | -4.42835139329683  | -9.20077124120753  |
| H  | -1.52525362130758  | -4.58968836430211  | -7.44499612598039  |
| H  | -1.18571634882131  | -6.05323035743742  | -8.43524845868159  |
| N  | -5.16462721310229  | -10.72504440539394 | -7.11798632745563  |
| N  | -2.53013293216441  | -10.75374465413490 | -5.94742007687864  |
| N  | -5.59600580012831  | -6.54428172629120  | -9.24479725947691  |
| N  | -3.12960674677852  | -5.15880573438771  | -8.68543997250193  |
| O  | -6.18770459664379  | -11.49062399484422 | -12.04821931895492 |
| Sb | -4.97782529920288  | -9.16919258450607  | -9.29685172989979  |
| C  | -6.94483784754867  | -11.05750771505778 | -15.07479066180227 |
| C  | -7.13606965292366  | -12.44603970475216 | -15.24270185871550 |
| C  | -6.88498999295208  | -13.04328375213325 | -16.49148129260491 |
| H  | -7.03933645428563  | -14.12315172173400 | -16.61792938193757 |
| C  | -6.47065551106191  | -12.25738077151092 | -17.57889661497586 |
| H  | -6.28272272115076  | -12.72405640322807 | -18.55367305034421 |
| C  | -6.34832418437757  | -10.86719050991580 | -17.43108599050176 |
| H  | -6.07789120206246  | -10.24402088505354 | -18.29408733879546 |
| C  | -6.58678981281787  | -10.25949210082187 | -16.18278675687466 |
| C  | -6.47617217975318  | -8.75863598293822  | -16.02267015053993 |
| H  | -5.49511639038744  | -8.51507816219734  | -15.57794540411471 |
| H  | -6.54308917155027  | -8.25338972915549  | -17.01205952237873 |
| C  | -8.84918980514999  | -8.24823123320807  | -15.69394521575623 |
| H  | -9.08617149210616  | -9.27804098710478  | -16.01806231165207 |
| H  | -8.87273804921165  | -7.59405938989779  | -16.59543984855966 |
| C  | -9.88333148709607  | -7.76672930744331  | -14.67977478116666 |
| H  | -10.87639024124554 | -7.72046763136593  | -15.16402877216771 |
| H  | -9.95903422651880  | -8.51558828833360  | -13.85138543596354 |
| C  | -8.20421965347434  | -6.44461431793379  | -13.57907993844871 |
| H  | -8.14833442647988  | -7.11268246285169  | -12.68279703323049 |
| H  | -7.96069128031921  | -5.42054231184452  | -13.24094120153124 |
| C  | -7.16961213967239  | -6.90086259731613  | -14.60000365452895 |
| H  | -7.13190623996200  | -6.17390646134851  | -15.44280251898082 |
| H  | -6.17114634155999  | -6.95338090855960  | -14.13484711913745 |
| C  | -10.54573197846633 | -5.95935130052496  | -13.22289427782795 |
| H  | -10.63275878581801 | -6.60407746470715  | -12.31398594588168 |
| H  | -11.53539574373790 | -5.92247342191676  | -13.71211699934472 |
| H  | -10.28773306129316 | -4.93690712057947  | -12.89410117007766 |
| C  | -7.69334536102237  | -13.24073680601990 | -14.08274907688652 |
| H  | -8.06205508790267  | -14.23312513627513 | -14.42626184190686 |

|    |                    |                    |                    |
|----|--------------------|--------------------|--------------------|
| H  | -6.91044276229989  | -13.40823079328822 | -13.32008984267646 |
| C  | -9.20307983038911  | -13.09703239250295 | -12.16803072175389 |
| H  | -8.33175451506145  | -13.16580805534976 | -11.49784306353849 |
| H  | -9.60212928310166  | -14.11703637620048 | -12.37130985045005 |
| C  | -10.27190419597475 | -12.24694884492424 | -11.49472556638823 |
| H  | -10.60865909786817 | -12.75367412372630 | -10.57224549056734 |
| H  | -9.81343912159002  | -11.27834987474452 | -11.18559964173291 |
| C  | -10.99842822758104 | -11.44104289475260 | -13.63199456270909 |
| H  | -10.59358641186817 | -10.40981553706085 | -13.46178758942708 |
| H  | -11.87157702228863 | -11.33943120819906 | -14.30366817726535 |
| C  | -9.92867371611972  | -12.28230605842611 | -14.31903033348484 |
| H  | -10.35555669823138 | -13.27117869677241 | -14.60325608068338 |
| H  | -9.58929259153809  | -11.78317245940895 | -15.24390357854166 |
| C  | -12.47524738764804 | -11.27785209462249 | -11.73436277398824 |
| H  | -12.80409162728910 | -11.78855588920580 | -10.81194178438238 |
| H  | -13.34703392601122 | -11.18852264309684 | -12.40761265319388 |
| H  | -12.14392551009936 | -10.24659755863493 | -11.45600646095037 |
| N  | -7.50354325115441  | -8.24542174003073  | -15.09789183930795 |
| N  | -9.54507430403613  | -6.44041532815989  | -14.16624678679747 |
| N  | -8.76830209618503  | -12.47069771321830 | -13.42925753341045 |
| N  | -11.42682809268135 | -12.05485844551952 | -12.38007801176273 |
| O  | -5.87314561382475  | -8.73864041544012  | -11.16968401197941 |
| Sb | -7.37340966341018  | -10.13553400101691 | -13.14977442165500 |
| O  | -5.49517517652944  | -9.13005672801117  | -13.33811388250497 |
| O  | -5.24109852232180  | -11.13945956520000 | -10.03400618160049 |
| C  | -4.97652086898055  | -8.71727596101730  | -12.19248858420360 |
| C  | -6.36838649651702  | -11.39566715137930 | -10.71970943337508 |
| O  | -7.46817258093981  | -11.54605528685885 | -10.16881543588664 |
| O  | -3.81434387439693  | -8.32461569743807  | -12.06226033913956 |

**Table S19.** Cartesian coordinates (Å) of dimers of **6**, *anti* isomer.

112

Coordinates from ORCA-job SbOCO2\_trans\_dim2\_opt

|   |                  |                   |                  |
|---|------------------|-------------------|------------------|
| C | 6.59693435428798 | 7.59430095297455  | 7.16686409928288 |
| C | 6.57406609068901 | 6.19706508384934  | 6.98509657192809 |
| C | 6.82321303767602 | 5.65412076629482  | 5.71128680983028 |
| H | 6.80664239337974 | 4.56502522386257  | 5.57308896441082 |
| C | 7.07560234145476 | 6.50149911870140  | 4.62121516244946 |
| H | 7.26673888039468 | 6.07569351164460  | 3.62852962500607 |
| C | 7.03776325336882 | 7.89464536825342  | 4.79090061715578 |
| H | 7.18371215428175 | 8.55863116301398  | 3.92852307172664 |
| C | 6.79421442380277 | 8.45074108255615  | 6.06103948782865 |
| C | 6.69769117836371 | 9.94715974699631  | 6.24962853626233 |
| H | 7.64122269352808 | 10.34276858331621 | 6.66960593859388 |
| H | 6.51542419387313 | 10.45279616341033 | 5.27539072853195 |
| C | 4.28762598510183 | 9.96998141110071  | 6.70374682850229 |
| H | 4.24652340491598 | 8.90001752164753  | 6.43028292679530 |
| H | 4.08789684049298 | 10.56358345982754 | 5.78303192672041 |
| C | 3.22817329244681 | 10.28171884508284 | 7.75769665583849 |
| H | 2.22448668029630 | 10.08897521629916 | 7.33471193481635 |
| H | 3.35552464983039 | 9.58209147088768  | 8.62301952452983 |

|    |                  |                   |                   |
|----|------------------|-------------------|-------------------|
| C  | 4.64644355196547 | 11.97887629786470 | 8.69110604458613  |
| H  | 4.88253535692179 | 11.38772581358025 | 9.60949299388110  |
| H  | 4.68812130716897 | 13.04847888381087 | 8.96841879729663  |
| C  | 5.69744547488234 | 11.69289578531784 | 7.62978607000831  |
| H  | 5.52071768554430 | 12.34826470780158 | 6.74681264431590  |
| H  | 6.71330206343585 | 11.88884975721411 | 8.01675652070339  |
| C  | 2.27999020673270 | 11.97111296789062 | 9.19007651321007  |
| H  | 2.39031838081913 | 11.36028864809886 | 10.12020324835516 |
| H  | 1.27651946103644 | 11.77723734249752 | 8.77044444533416  |
| H  | 2.33311311297575 | 13.03769642130588 | 9.47252620884314  |
| C  | 6.26007952574337 | 5.32251601619469  | 8.17273187237167  |
| H  | 5.97293396926035 | 4.29811484593517  | 7.84856728906210  |
| H  | 7.16838435041632 | 5.25076404476875  | 8.80485781326429  |
| C  | 5.06750819933991 | 5.27532552175314  | 10.29494987335847 |
| H  | 6.04975149778817 | 5.33914159279555  | 10.79093954315657 |
| H  | 4.79933394060755 | 4.20306795495778  | 10.16201140383213 |
| C  | 4.00857555709572 | 5.97426228750687  | 11.13436750151320 |
| H  | 3.90523508698473 | 5.45791015945875  | 12.10691317819921 |
| H  | 4.34920390772545 | 7.01708534536491  | 11.34135157009480 |
| C  | 2.82756493278642 | 6.60989286763407  | 9.14839909755703  |
| H  | 3.08708128173902 | 7.69402078213614  | 9.25490901111974  |
| H  | 1.85069424754107 | 6.55850396233281  | 8.63270485100897  |
| C  | 3.89086495000729 | 5.92984894054860  | 8.29323802341681  |
| H  | 3.58090846308008 | 4.88436605136306  | 8.06776204945708  |
| H  | 4.00517655923168 | 6.46293756739281  | 7.33227533412168  |
| C  | 1.67872883394717 | 6.59826997303366  | 11.26889534651271 |
| H  | 1.58408538765923 | 6.06552276934711  | 12.23194382670722 |
| H  | 0.70504563884832 | 6.54334931687047  | 10.75012682744734 |
| H  | 1.89504962504439 | 7.67319826072681  | 11.48663229422718 |
| N  | 5.63413751561566 | 10.27702526360585 | 7.21841137452653  |
| N  | 3.30074835511956 | 11.67323915998742 | 8.19528388072520  |
| N  | 5.19067116758593 | 5.93554268717242  | 8.98653933546088  |
| N  | 2.71009499028556 | 5.96791613903799  | 10.45582763622615 |
| O  | 9.43019055009972 | 10.37497956637493 | 10.41604256301379 |
| Sb | 6.21460687133186 | 8.46346763308922  | 9.11762156541234  |
| C  | 7.00767614631704 | 9.65860853585457  | 12.38779725028194 |
| C  | 6.43565429049517 | 10.92704650368170 | 12.12832582588628 |
| C  | 5.04730542489988 | 11.11128231048120 | 12.28695458777067 |
| H  | 4.61020933839014 | 12.09836232341660 | 12.08812503998751 |
| C  | 4.23572522057170 | 10.06437226036208 | 12.74695139379515 |
| H  | 3.15780255716966 | 10.21949931373147 | 12.87742031238611 |
| C  | 4.82204417819438 | 8.84355214860897  | 13.11451782203899 |
| H  | 4.20852090214484 | 8.05154153008572  | 13.56277068082726 |
| C  | 6.20324381216426 | 8.63602120041991  | 12.94123501408101 |
| C  | 6.83798609248818 | 7.33062427497076  | 13.35694141844843 |
| H  | 6.97057665659239 | 6.71032844423643  | 12.45266717565897 |
| H  | 6.17701392269937 | 6.78084113476643  | 14.06403034570997 |
| C  | 8.07297667121794 | 8.16518649535654  | 15.28231093253291 |
| H  | 7.53360152774883 | 9.12551173029249  | 15.18787272080562 |
| H  | 7.48060415922056 | 7.50724983386857  | 15.95785735203686 |
| C  | 9.45776013567271 | 8.39623429289558  | 15.87803012253639 |

|    |                   |                   |                   |
|----|-------------------|-------------------|-------------------|
| H  | 9.34911284192244  | 8.80248297167655  | 16.90075860683129 |
| H  | 9.993335356920562 | 9.17182557747049  | 15.27347374681331 |
| C  | 10.33202879312353 | 6.56893279286233  | 14.59719302055700 |
| H  | 10.90813693784026 | 7.23394614934908  | 13.90780606121574 |
| H  | 10.88415886104941 | 5.61433280166325  | 14.66751096590713 |
| C  | 8.95524505894780  | 6.30650891532782  | 14.00028247087006 |
| H  | 8.42136373722971  | 5.54620735848456  | 14.61373154010480 |
| H  | 9.06482612841157  | 5.92831485571643  | 12.97044265682312 |
| C  | 11.51852012894394 | 7.34126240414446  | 16.56130732485186 |
| H  | 12.17104077622578 | 8.05308093855697  | 15.99878633877289 |
| H  | 11.38894213644332 | 7.73222898003375  | 17.58631324237493 |
| H  | 12.04655088089932 | 6.37367893166413  | 16.62737851405685 |
| C  | 7.32069136167991  | 12.10505926026447 | 11.78037738805542 |
| H  | 6.76733391267036  | 13.05489762144529 | 11.96017883692754 |
| H  | 7.60608147588454  | 12.10357768155905 | 10.71272431239393 |
| C  | 9.58762654217673  | 12.96377393346227 | 12.01987683389341 |
| H  | 9.76124960303771  | 12.67422843717834 | 10.96985658385924 |
| H  | 9.22712769993483  | 14.01732547741065 | 12.05013618702517 |
| C  | 10.87579475400495 | 12.84537095901050 | 12.82371650748663 |
| H  | 11.62086269779055 | 13.55891936825887 | 12.42728358694293 |
| H  | 11.29696861072758 | 11.81781780984859 | 12.69070032167759 |
| C  | 9.62053359085281  | 12.25529301374144 | 14.78337856174752 |
| H  | 9.96830513272815  | 11.19042041944001 | 14.77806261422698 |
| H  | 9.42901437279150  | 12.52880269115571 | 15.83783025717654 |
| C  | 8.32145166785981  | 12.35734753103928 | 13.99038053185047 |
| H  | 7.89284663816037  | 13.37977532670914 | 14.10566003028082 |
| H  | 7.58082364509926  | 11.63581283831370 | 14.38187614316342 |
| C  | 11.86861003715306 | 13.09892098340620 | 15.01762801109892 |
| H  | 12.60156296825581 | 13.81448757389987 | 14.60486920579492 |
| H  | 11.66162216145421 | 13.38520371054025 | 16.06447599395002 |
| H  | 12.34152292474900 | 12.08565734292422 | 15.02297116080103 |
| N  | 8.16924025698383  | 7.55311461009141  | 13.94396537615990 |
| N  | 10.21567667860797 | 7.14972332616644  | 15.93733084597361 |
| N  | 8.56125435814697  | 12.06064321644981 | 12.56997422210898 |
| N  | 10.63923865783546 | 13.14797844520815 | 14.23854467406331 |
| O  | 7.34026700203080  | 7.25595875811010  | 10.39874056075703 |
| Sb | 9.17876425124679  | 9.36517000036235  | 12.22030101189530 |
| O  | 9.43375850357738  | 7.56137800914584  | 11.19662386810132 |
| O  | 8.06856473616198  | 9.39111093216834  | 8.88939427336084  |
| C  | 8.65329165039631  | 6.95399198903790  | 10.29021629975722 |
| C  | 8.67690890933704  | 10.49047429812352 | 9.31954292900491  |
| O  | 8.62886951345946  | 11.57505073302519 | 8.71743164028515  |
| O  | 9.09680822442300  | 6.11569466103385  | 9.51248267868004  |

**Table S20.** Cartesian coordinates (Å) of (RSb)<sub>2</sub>(μ-O)(μ-CO<sub>3</sub>), *syn* isomer.  
109

Coordinates from ORCA-job RSbOCO2\_bridging\_cis

|   |                   |                  |                  |
|---|-------------------|------------------|------------------|
| C | 2.03541084859367  | 7.81058437120796 | 3.59476124507381 |
| C | 0.67079482103800  | 7.92470429936971 | 3.25046435338205 |
| C | 0.28579012805519  | 8.72320829007194 | 2.15563021261721 |
| H | -0.77736481585793 | 8.81188458105271 | 1.89395704421092 |



|   |                   |                   |                   |
|---|-------------------|-------------------|-------------------|
| C | 1.25489753861909  | 9.41504699045507  | 1.41281507006522  |
| H | 0.95339478042095  | 10.03430788551510 | 0.55894999893844  |
| C | 2.60301337823350  | 9.36173373248652  | 1.80224945100239  |
| H | 3.35580577267306  | 9.95187813470901  | 1.26296750957286  |
| C | 2.99768641371212  | 8.57750176321980  | 2.90164822100069  |
| C | -0.37095556176826 | 7.16689059069639  | 4.04723881904946  |
| H | -1.37183572159388 | 7.64109967436191  | 3.93580646225602  |
| H | -0.45442869384085 | 6.13648450685692  | 3.65859539454412  |
| C | -0.70986484315570 | 5.94148816767357  | 6.12347767504301  |
| H | -0.43175408300397 | 5.01433307355934  | 5.59061644454361  |
| H | -1.81057871869227 | 6.09448112408422  | 6.05353433433134  |
| C | -0.30022643750735 | 5.83422333750189  | 7.58753539195115  |
| H | -0.89399206222413 | 5.03744189688864  | 8.07169921847603  |
| H | 0.77386598776760  | 5.52933021973536  | 7.64647002881212  |
| C | 0.21393333883754  | 8.17381795853762  | 7.65092097709560  |
| H | 1.31665949454176  | 7.99839833295766  | 7.72109290705742  |
| H | 0.00262745291031  | 9.12308019837621  | 8.17686723177086  |
| C | -0.18230358259993 | 8.31685285739649  | 6.18533881427603  |
| H | -1.24607659063978 | 8.63939264661196  | 6.11688212912833  |
| H | 0.43879645115201  | 9.08865285349642  | 5.69499789188223  |
| C | -0.22560990637206 | 6.99213651122875  | 9.71001334424010  |
| H | 0.84875710976275  | 6.75283952050609  | 9.90218038417924  |
| H | -0.84043246201443 | 6.19901773030584  | 10.17118755341619 |
| H | -0.45985613543881 | 7.94562062895015  | 10.21603137899406 |
| C | 4.42588460947890  | 8.59253298105712  | 3.40232247643468  |
| H | 4.94399941043302  | 7.66783533023471  | 3.09070617061870  |
| H | 4.97660227281474  | 9.45947267102322  | 2.97067299300940  |
| C | 3.91699869118689  | 9.88054102993815  | 5.41704994257282  |
| H | 2.90659136118374  | 10.05416407297847 | 5.00453873329448  |
| H | 4.56092997812789  | 10.73885700229184 | 5.11252388615840  |
| C | 3.85000578074791  | 9.80475636867989  | 6.93907442446954  |
| H | 3.48794421808465  | 10.76879441600488 | 7.34348129954930  |
| H | 3.10078816895091  | 9.02175994016958  | 7.22622712420900  |
| C | 5.69782861638170  | 8.26911091163038  | 6.94745844665001  |
| H | 5.07410014777382  | 7.38736361490425  | 7.23776640633675  |
| H | 6.71020024004945  | 8.09879716269243  | 7.35600771124288  |
| C | 5.77207388175542  | 8.33927278835945  | 5.42792892304686  |
| H | 6.49261955674671  | 9.13405771803295  | 5.12512821444791  |
| H | 6.11487074318248  | 7.36677552427947  | 5.03650537234241  |
| C | 5.11950434077260  | 9.47758166692831  | 8.96323849988042  |
| H | 4.76356617318080  | 10.44805861531173 | 9.35414529640408  |
| H | 6.13320136274934  | 9.29699160232376  | 9.36281784910041  |
| H | 4.44650847707577  | 8.67675987293940  | 9.35991377579423  |
| C | 3.57194497745890  | 4.46100995088921  | 1.91676408710612  |
| C | 2.67801182140595  | 5.27278941072683  | 1.18544090719693  |
| C | 3.16815737364411  | 6.16174946307020  | 0.21247110332213  |
| H | 2.46795917808364  | 6.80765153543141  | -0.33295449332907 |
| C | 4.54339743839692  | 6.21069291930003  | -0.06394106792966 |
| H | 4.92774397042615  | 6.90633458559256  | -0.82009899297875 |
| C | 5.41708254307590  | 5.32151769441806  | 0.58197490570660  |
| H | 6.48208620146979  | 5.30451657108461  | 0.31358953294402  |

|    |                   |                   |                   |
|----|-------------------|-------------------|-------------------|
| C  | 4.93764713204999  | 4.43655758609323  | 1.56757632832810  |
| C  | 1.19549233829845  | 5.14427072815933  | 1.44608572254531  |
| H  | 0.94478035699651  | 5.72338773452034  | 2.34517449982416  |
| H  | 0.60452553020283  | 5.55081579929537  | 0.59557958011878  |
| C  | -0.48833911092607 | 3.62149644875743  | 2.34556405670719  |
| H  | -1.27429868313907 | 4.04436417430388  | 1.67852165333747  |
| H  | -0.46762236712506 | 4.19984945038977  | 3.28607822074650  |
| C  | -0.80566129209342 | 2.16266849561985  | 2.65641686775886  |
| H  | -0.09960753225744 | 1.79874672314416  | 3.44484618775775  |
| H  | -1.82873174942128 | 2.09133749493368  | 3.06944141100430  |
| C  | 0.61393390764844  | 1.44625841939823  | 0.86671202631856  |
| H  | 0.65256909646857  | 0.84046136827231  | -0.05739917450129 |
| H  | 1.39057099224841  | 1.04045515161235  | 1.56192355047891  |
| C  | 0.94813234801048  | 2.89538959965923  | 0.53503332123563  |
| H  | 1.98122104908918  | 2.97211952384566  | 0.15145694703836  |
| H  | 0.26000786299325  | 3.26417793348217  | -0.25991322038366 |
| C  | -1.08804837831309 | -0.04498616875328 | 1.71269806314223  |
| H  | -1.05973471384675 | -0.62503936934131 | 0.77309194304795  |
| H  | -2.11614321113897 | -0.09186784933021 | 2.11371982927659  |
| H  | -0.40739866047324 | -0.54221141469993 | 2.44684106128383  |
| C  | 5.88000464564285  | 3.45770241072414  | 2.23732029173759  |
| H  | 6.73473916416679  | 3.23590214095497  | 1.55716358920216  |
| H  | 6.31776968290456  | 3.90550907456801  | 3.14785612459173  |
| C  | 5.95541179486197  | 1.47876796396399  | 3.64867041263484  |
| H  | 6.09824498359393  | 2.14636567939546  | 4.51525991434120  |
| H  | 6.95343559864393  | 1.18807846293802  | 3.24693058363103  |
| C  | 5.19728893064171  | 0.22765873511388  | 4.07127019983111  |
| H  | 5.80316770676794  | -0.33874736851930 | 4.80197334126961  |
| H  | 4.25128904546162  | 0.53092454848837  | 4.58530238926347  |
| C  | 4.16170398923558  | 0.10134920651785  | 1.91178328132744  |
| H  | 3.15124537673253  | 0.38590630191435  | 2.30312897025185  |
| H  | 3.99792880071563  | -0.55161214777689 | 1.03402203471982  |
| C  | 4.89999168118158  | 1.36297301664298  | 1.47473691764139  |
| H  | 5.84418519142468  | 1.07874040600716  | 0.95386399352151  |
| H  | 4.28131878658611  | 1.93683865743035  | 0.76023012823758  |
| C  | 4.25546106005533  | -1.86615313196285 | 3.30324939737583  |
| H  | 4.87671374276085  | -2.41715776320744 | 4.03157630223240  |
| H  | 4.11215469202856  | -2.51054442668489 | 2.41715149699139  |
| H  | 3.25339924826693  | -1.69054066410371 | 3.76837615585757  |
| N  | 4.43913892046862  | 8.62076896604328  | 4.87278931405285  |
| N  | 5.16192852882326  | 9.51371933643090  | 7.50893742025640  |
| N  | 0.00489057865211  | 7.04710611236460  | 5.46188534544472  |
| N  | -0.53982636037699 | 7.09669191316643  | 8.29046322996657  |
| N  | 0.83943193458993  | 3.74466771876627  | 1.73099240147571  |
| N  | -0.72392499859327 | 1.34077364376661  | 1.44845193918914  |
| N  | 5.19081601069828  | 2.22016303693269  | 2.63187549292450  |
| N  | 4.92571206950608  | -0.63337160865546 | 2.91596666375498  |
| O  | 1.71778423321366  | 4.85583227486888  | 4.39457664235064  |
| O  | 4.44128777325686  | 5.88080073590199  | 4.38554459642562  |
| Sb | 2.59966715436073  | 6.48174666044785  | 5.23618513183100  |
| Sb | 2.77039561658258  | 3.31262130474051  | 3.59937082550839  |

|   |                  |                  |                  |
|---|------------------|------------------|------------------|
| O | 4.31796850303450 | 3.69732755278861 | 4.99998232859981 |
| C | 5.05576200078108 | 4.81346920829807 | 4.92154453527218 |
| O | 6.23313056181139 | 4.84900191426579 | 5.28944771871116 |

**Table S21.** Cartesian coordinates (Å) of **(RSb)<sub>2</sub>(μ-O)(μ-CO<sub>3</sub>)**, *anti* isomer.

109

Coordinates from ORCA-job RSbOCO2\_bridging\_trans

|   |                  |                   |                   |
|---|------------------|-------------------|-------------------|
| C | 6.50453793828048 | 7.47159655849106  | 7.77015980200522  |
| C | 6.07786043962436 | 6.14566167384757  | 7.53593696515498  |
| C | 6.55582075128920 | 5.45753747984487  | 6.40194158114241  |
| H | 6.22275032373563 | 4.42740947539146  | 6.21817900711885  |
| C | 7.43911164665990 | 6.07924953627113  | 5.50748344687090  |
| H | 7.80520990012884 | 5.53301413337212  | 4.62941914715945  |
| C | 7.81828154789167 | 7.41624123795526  | 5.71265694066556  |
| H | 8.46820664881055 | 7.92521299244813  | 4.98817198555817  |
| C | 7.34391842603729 | 8.11525156034907  | 6.83609417143627  |
| C | 7.64989891304562 | 9.57995515155270  | 7.04811572754196  |
| H | 8.37229049706786 | 9.70094948765773  | 7.87717249341908  |
| H | 8.08322696576774 | 10.03359113814416 | 6.12894199917746  |
| C | 5.39342107095103 | 10.30307464618956 | 6.41316734630331  |
| H | 5.17893691249521 | 9.26206389900224  | 6.11373987022075  |
| H | 5.76797915166868 | 10.84695105199219 | 5.51598266890570  |
| C | 4.12498897188828 | 10.97245164571238 | 6.92999486853852  |
| H | 3.37687754124062 | 11.02177880466204 | 6.11736829954056  |
| H | 3.68757642247779 | 10.34146465183369 | 7.74514479218054  |
| C | 5.43200398569820 | 12.30627920370654 | 8.43893466961278  |
| H | 5.07997750440413 | 11.75430789369942 | 9.34710978785008  |
| H | 5.65026885265013 | 13.34468589552178 | 8.75023817047382  |
| C | 6.70691627124506 | 11.64555803438894 | 7.92893835182774  |
| H | 7.14363913038902 | 12.25834696200568 | 7.10742318970048  |
| H | 7.44621829046821 | 11.55553015922457 | 8.74298733481231  |
| C | 3.19206196968624 | 13.00038406051501 | 7.85448731621711  |
| H | 2.70970398152553 | 12.48831719480856 | 8.72362913273851  |
| H | 2.45605964832693 | 13.04312342638203 | 7.03197158441947  |
| H | 3.42911619936084 | 14.03605278130302 | 8.15661976562191  |
| C | 5.12637594247606 | 5.46653989967280  | 8.49637339568738  |
| H | 4.61722487917575 | 4.61190398134995  | 7.99622118001095  |
| H | 5.71700275060063 | 5.06064754687393  | 9.34140176103748  |
| C | 3.53560333261631 | 5.91777302465296  | 10.28891690314487 |
| H | 4.35468205052208 | 5.70349421396287  | 10.99489017371280 |
| H | 2.96618216616079 | 4.98024296068025  | 10.09301056957575 |
| C | 2.60362954018689 | 6.96895568360598  | 10.87767603331559 |
| H | 2.11750845299856 | 6.56161371458930  | 11.78322707622712 |
| H | 3.20444872929358 | 7.85420459815760  | 11.20177471967447 |
| C | 2.16347238331972 | 7.82647744727729  | 8.67180924732951  |
| H | 2.72442439519605 | 8.78154789247839  | 8.83795841724458  |
| H | 1.35675675896612 | 8.04611148461256  | 7.94738978558171  |
| C | 3.11166666722264 | 6.78960392569403  | 8.07356546905644  |
| H | 2.53265948858192 | 5.89175619632944  | 7.75456458974873  |
| H | 3.60754775062874 | 7.20598058721887  | 7.17682060056656  |
| C | 0.63658653826509 | 8.31543307620606  | 10.47280593867826 |

|    |                   |                   |                   |
|----|-------------------|-------------------|-------------------|
| H  | 0.16543097886341  | 7.90295080916943  | 11.38281993899958 |
| H  | -0.16247278426727 | 8.53812964474760  | 9.74284541796922  |
| H  | 1.13152447825549  | 9.28015461573672  | 10.74869485505238 |
| N  | 6.42228685788600  | 10.28384947745000 | 7.46470909689289  |
| N  | 4.40217121381892  | 12.32922290268368 | 7.40059346337335  |
| N  | 4.14637562136766  | 6.41558591213838  | 9.04632621922821  |
| N  | 1.56345384141524  | 7.34262227604369  | 9.91363295768722  |
| O  | 7.45534806717259  | 9.55990813246586  | 10.09426483201294 |
| Sb | 5.76694388347783  | 8.57628585912579  | 9.50041930025865  |
| C  | 6.59577537653292  | 8.78297062637880  | 12.98056550639668 |
| C  | 5.59918736188432  | 9.78385656550269  | 12.93668491845552 |
| C  | 4.35286579048437  | 9.56438702913886  | 13.55435661751282 |
| H  | 3.58145077170049  | 10.34515609488220 | 13.51296384226493 |
| C  | 4.10861905347219  | 8.36687989757317  | 14.24440586400067 |
| H  | 3.13737957088482  | 8.19727786160613  | 14.72513333502192 |
| C  | 5.13195089078954  | 7.41444615951866  | 14.36915653684894 |
| H  | 4.96729442931835  | 6.50478641046572  | 14.96232410366686 |
| C  | 6.37790111276417  | 7.61881468810407  | 13.74632781005797 |
| C  | 7.48059799777608  | 6.59201033723822  | 13.89506759347517 |
| H  | 7.43764508891251  | 5.86405628993686  | 13.06433529277766 |
| H  | 7.32801470097391  | 6.00565239047633  | 14.83054470875936 |
| C  | 9.08754025639772  | 7.94742632564620  | 15.12246864845700 |
| H  | 8.30219347852547  | 8.71306839968793  | 15.26175558543621 |
| H  | 9.04760587309610  | 7.25614287307917  | 15.99652185987457 |
| C  | 10.45992531988456 | 8.61122805363357  | 15.06145956734232 |
| H  | 10.66840453112680 | 9.11163659724941  | 16.02563042234555 |
| H  | 10.44631667972826 | 9.40748860888639  | 14.27358389184328 |
| C  | 11.22751632139469 | 6.91425785579178  | 13.55004001149822 |
| H  | 11.24810826538719 | 7.60614057452872  | 12.67151876590592 |
| H  | 12.01425170360964 | 6.15455876397569  | 13.39018971512222 |
| C  | 9.86903367055861  | 6.22841681817776  | 13.60960342826399 |
| H  | 9.88199199567718  | 5.44963634128074  | 14.40649554723786 |
| H  | 9.64617189805205  | 5.74953692283766  | 12.64117229553563 |
| C  | 12.82833928416690 | 8.23953213410837  | 14.79143724908650 |
| H  | 12.94735531261259 | 9.01014954407581  | 13.98966799450083 |
| H  | 13.02348031254533 | 8.72565280609950  | 15.76429828709984 |
| H  | 13.59873821721830 | 7.46371129157532  | 14.63478919893281 |
| C  | 5.90112963571381  | 11.10367554977368 | 12.25876899639479 |
| H  | 5.20419478210802  | 11.89478341460094 | 12.61788089173095 |
| H  | 5.76330687983257  | 11.01187841142150 | 11.16567234835611 |
| C  | 7.73511549050683  | 12.55137747783647 | 11.56627779140080 |
| H  | 7.57985258451184  | 12.18619543634948 | 10.53782140632561 |
| H  | 7.12437532145299  | 13.47171268657309 | 11.71616788710948 |
| C  | 9.20971377969093  | 12.87359261529260 | 11.78215980698659 |
| H  | 9.50344718650185  | 13.70963437968164 | 11.12101546650231 |
| H  | 9.82126078225088  | 11.98329573443755 | 11.48958070911640 |
| C  | 9.04182044008090  | 12.18476181564036 | 14.07158796990846 |
| H  | 9.64940260643323  | 11.25971224043118 | 13.90774920174310 |
| H  | 9.20921083279552  | 12.50607908095620 | 15.11621718932554 |
| C  | 7.56704642441085  | 11.85303953392362 | 13.87481025425918 |
| H  | 6.94491815282738  | 12.73059745775331 | 14.16666711086922 |

|    |                   |                   |                   |
|----|-------------------|-------------------|-------------------|
| H  | 7.27822107756095  | 11.00309627118280 | 14.51840313322836 |
| C  | 10.84984818533287 | 13.63436156504549 | 13.38896678021670 |
| H  | 11.11913997670627 | 14.47484535587560 | 12.72486427230020 |
| H  | 10.98952992211080 | 13.96473155657025 | 14.43372064546398 |
| H  | 11.56331363850619 | 12.79654383815530 | 13.19305502110532 |
| N  | 8.81028542913753  | 7.21641452273615  | 13.87808221948004 |
| N  | 11.50722114702726 | 7.62793333458431  | 14.79974285187918 |
| N  | 7.30312755209190  | 11.48435761336052 | 12.47558683458831 |
| N  | 9.45878518536421  | 13.25966305788309 | 13.17187160012778 |
| O  | 6.30803050667669  | 6.96080957939685  | 10.74108288119250 |
| Sb | 8.42204358067552  | 9.04866132453682  | 11.78351653540193 |
| O  | 8.57264476588759  | 7.10547972115438  | 10.98713212654803 |
| C  | 7.50210357285449  | 6.34305279131487  | 10.74723713406073 |
| O  | 7.59720444545927  | 5.12054450987994  | 10.60437767337657 |

**Table S22.** Cartesian coordinates (Å) of **8**.

58

Coordinates from ORCA-job Sboxa\_opt

|   |                  |                   |                  |
|---|------------------|-------------------|------------------|
| C | 4.91729671117113 | 0.14693343849685  | 3.07698456012117 |
| C | 6.07457205741447 | -0.02234840667544 | 2.29021448174252 |
| C | 6.68987416036375 | -1.28648209609716 | 2.22659786722270 |
| H | 7.59496663235489 | -1.42219196390801 | 1.62003613700426 |
| C | 6.15472361057100 | -2.36800191437590 | 2.94520436436819 |
| H | 6.63975456622903 | -3.35037819302647 | 2.89548521776024 |
| C | 5.01867444298958 | -2.18872027485361 | 3.75135649267825 |
| H | 4.61934351478741 | -3.02844572262804 | 4.33523030068246 |
| C | 4.39530856337271 | -0.92912435606545 | 3.82324460891954 |
| C | 6.61964132053632 | 1.16631408844400  | 1.52816958942239 |
| H | 7.68745870320511 | 1.01052209416438  | 1.26076239364303 |
| H | 6.04833538756263 | 1.29562642775388  | 0.59075688626879 |
| C | 7.36421649387210 | 2.45069597675059  | 3.46631868776265 |
| H | 8.41843505146472 | 2.40036983805597  | 3.11417731902957 |
| H | 7.17495004494036 | 1.56243160320901  | 4.09610214811591 |
| C | 7.15674045615333 | 3.72712180994092  | 4.27498228629389 |
| H | 6.13936914151627 | 3.70751309469645  | 4.74602610663597 |
| H | 7.89187052332865 | 3.75641292527070  | 5.10032055853644 |
| C | 6.61699050956462 | 3.61063945069446  | 1.47124592055001 |
| H | 5.87056278338801 | 3.56064901193635  | 0.66057124374057 |
| H | 7.63626349700774 | 3.62181694608519  | 1.02587190396093 |
| C | 6.41071745397795 | 4.87203093514134  | 2.30180948851023 |
| H | 6.59114947519106 | 5.75735629644547  | 1.66562721612266 |
| H | 5.34522689829240 | 4.92179788641908  | 2.63997719777851 |
| C | 7.21095487663920 | 6.14117884523562  | 4.20354126006956 |
| H | 7.96162196123072 | 6.15512418096088  | 5.01359115917417 |
| H | 6.20087428104240 | 6.26826595854870  | 4.66479497263324 |
| H | 7.39857199938642 | 7.00930438530320  | 3.54760783024409 |
| C | 3.17144666166919 | -0.69488102906834 | 4.68242342813199 |
| H | 2.26444292467378 | -0.73818262442734 | 4.05217234205826 |
| H | 3.08190246103744 | -1.47708138793613 | 5.46734645737578 |
| C | 4.24694545116540 | 0.74288479398578  | 6.33425439801993 |
| H | 5.22293994616256 | 0.47971649164034  | 5.88753894083924 |

|    |                  |                  |                   |
|----|------------------|------------------|-------------------|
| H  | 4.03063953711060 | 0.00554236344997 | 7.13893923394396  |
| C  | 4.29700424108164 | 2.14657404873293 | 6.92797329454456  |
| H  | 5.03944298687497 | 2.16732655043239 | 7.74703528030381  |
| H  | 4.65412840336215 | 2.86737005019284 | 6.14689412776367  |
| C  | 1.89836394493026 | 1.06009197900077 | 5.81599018100149  |
| H  | 1.56821095866911 | 0.34373707234904 | 6.60037060714306  |
| H  | 1.17785323274688 | 1.03610060890466 | 4.98101020493875  |
| C  | 1.97499325521680 | 2.46282818917649 | 6.40788556064984  |
| H  | 2.17894698711574 | 3.19922320249081 | 5.59036069341256  |
| H  | 0.99411384407889 | 2.72533204850035 | 6.84385078350214  |
| C  | 3.03248905192499 | 3.84348867960659 | 8.09386863124242  |
| H  | 3.77246088118838 | 3.83906951380698 | 8.91378648187139  |
| H  | 2.04391328135886 | 4.07865498439349 | 8.52577147710763  |
| H  | 3.30441802029480 | 4.66447663124232 | 7.38588736422717  |
| C  | 2.82050905396581 | 1.71722215107012 | 0.47076273345577  |
| C  | 1.74791028480367 | 1.13947432581424 | 1.45475933364718  |
| N  | 6.44799876487524 | 2.40667778459464 | 2.30982834818738  |
| N  | 7.33473692119736 | 4.90837808334713 | 3.43692491016912  |
| N  | 3.21404127629241 | 0.65257288347653 | 5.28355029529519  |
| N  | 2.99333462054632 | 2.53349508713369 | 7.45740543247626  |
| Sb | 3.96600956969716 | 2.08706255395354 | 3.18272135860083  |
| O  | 3.88004078339821 | 2.26829362273962 | 1.07859839828368  |
| O  | 2.05833122697992 | 1.28663552383474 | 2.75019698189499  |
| O  | 2.68644930537548 | 1.67189284514660 | -0.73769358019063 |
| O  | 0.72214130965201 | 0.61441740049224 | 1.06433055011059  |

**Table S23.** Cartesian coordinates (Å) of the cation of **9**.  
73

Coordinates from ORCA-job Sbdop\_opt

|   |                  |                   |                  |
|---|------------------|-------------------|------------------|
| C | 4.92425018868465 | 0.20677543681850  | 2.90266698617866 |
| C | 6.10981560968330 | 0.06066635671552  | 2.15536884894030 |
| C | 6.71890123792221 | -1.20468091960966 | 2.06045942149350 |
| H | 7.65038677597389 | -1.32173797977313 | 1.49104535820645 |
| C | 6.14995198469104 | -2.31061439733758 | 2.71384773516957 |
| H | 6.63542747935291 | -3.29190636604183 | 2.64898693526195 |
| C | 4.98637195397238 | -2.15496547422681 | 3.48597955206935 |
| H | 4.56878675413910 | -3.01240695235926 | 4.03042534478938 |
| C | 4.36938152078093 | -0.89394701785947 | 3.58533277329937 |
| C | 6.69783536301878 | 1.28413885934440  | 1.48541698792393 |
| H | 7.77518005337579 | 1.13425095952096  | 1.25779730074595 |
| H | 6.17038774802192 | 1.47298868968012  | 0.53282909852380 |
| C | 7.36756795139427 | 2.44564436914558  | 3.52534621572918 |
| H | 8.43288466730344 | 2.39153168202007  | 3.21172372999825 |
| H | 7.13568974820790 | 1.52914331760726  | 4.09742515056069 |
| C | 7.15337408618412 | 3.68148062732583  | 4.39267700737449 |
| H | 6.12032417674613 | 3.65788708784711  | 4.82860658472627 |
| H | 7.85914890694778 | 3.65097832319720  | 5.24283196105634 |
| C | 6.71614981616031 | 3.72913892432493  | 1.56884859386793 |
| H | 5.99925455167361 | 3.73729993064086  | 0.73050318090563 |
| H | 7.75061318614589 | 3.74967287250011  | 1.16199659783937 |
| C | 6.49700957979166 | 4.94397096999570  | 2.46335213342639 |

|    |                   |                   |                   |
|----|-------------------|-------------------|-------------------|
| H  | 6.70947109595773  | 5.86115705947543  | 1.88505845921010  |
| H  | 5.42060267372568  | 4.98912618792204  | 2.76838864664782  |
| C  | 7.26591339562104  | 6.09565910412168  | 4.45258005269512  |
| H  | 7.99248000906155  | 6.04812527576832  | 5.28253838809090  |
| H  | 6.24619901327409  | 6.22428540613097  | 4.89054711219073  |
| H  | 7.49510760634571  | 6.99082578056480  | 3.84878206163742  |
| C  | 3.12571709830701  | -0.67528880282004 | 4.42074386340816  |
| H  | 2.23612686938341  | -0.67474674584705 | 3.76483042991283  |
| H  | 3.00209652435330  | -1.48703522819854 | 5.17032992502784  |
| C  | 4.17873338310797  | 0.67922608701041  | 6.15578146761792  |
| H  | 5.16311014540852  | 0.42915348495984  | 5.72064019470013  |
| H  | 3.93734030805962  | -0.09336560927443 | 6.91849187917411  |
| C  | 4.22408794164620  | 2.05209588035451  | 6.81744860906609  |
| H  | 4.94660156316988  | 2.02584670294403  | 7.65348973391808  |
| H  | 4.60557743321660  | 2.80747420193723  | 6.08200859489288  |
| C  | 1.84619040745539  | 1.04928618197028  | 5.59178090265373  |
| H  | 1.48237912523941  | 0.30133529946842  | 6.33027871312848  |
| H  | 1.15031791414611  | 1.07863645134110  | 4.73588141852412  |
| C  | 1.92356681826092  | 2.42053948552645  | 6.25445919803868  |
| H  | 2.15940772746655  | 3.19328984043180  | 5.47940753159143  |
| H  | 0.93371549738772  | 2.67456023992704  | 6.67494184793411  |
| C  | 2.94241662607243  | 3.69337733529557  | 8.04691389416951  |
| H  | 3.65896778552514  | 3.63309939567075  | 8.88464558926716  |
| H  | 1.94460408084461  | 3.91103347114651  | 8.46592710666478  |
| H  | 3.23996544865314  | 4.55122041959935  | 7.39616359871612  |
| C  | 2.93167256446831  | 1.86888099675887  | 0.34308836413994  |
| C  | 1.90891454942649  | 1.30387059452133  | 1.17909818243070  |
| N  | 6.49890284177178  | 2.48021143431455  | 2.32891458782943  |
| N  | 7.38240143323154  | 4.90043380635894  | 3.62598524565812  |
| N  | 3.16994980883423  | 0.64623338729835  | 5.07599381073112  |
| N  | 2.91083112746915  | 2.42261347924562  | 7.33267174140001  |
| Sb | 3.98897114452915  | 2.15600871579098  | 3.05791517436356  |
| O  | 3.98288418151590  | 2.44128537433088  | 0.94914818468789  |
| O  | 2.07232297874077  | 1.38722911838572  | 2.50937868580317  |
| C  | 0.78329380098293  | 0.71022183470321  | 0.58613785354022  |
| C  | 2.79240920709334  | 1.82506157661374  | -1.05511372671613 |
| C  | 1.65569963947466  | 1.23277056660873  | -1.63585283868511 |
| C  | 0.64651242177924  | 0.68216242983175  | -0.82332617889003 |
| H  | 3.57335216012270  | 2.27669072162650  | -1.67777361552459 |
| H  | 1.55027391921323  | 1.22523407719421  | -2.72936547510931 |
| H  | 0.00066608628490  | 0.30357457820223  | 1.24141130487482  |
| C  | -0.54024024692465 | -0.02077183511105 | -1.45139674585924 |
| H  | -1.43893211678694 | 0.07871318752676  | -0.80933901250366 |
| H  | -0.77959370308938 | 0.42833076095068  | -2.43606915985616 |
| C  | -0.18132275701535 | -1.49342416259519 | -1.62356712523125 |
| H  | 0.04160317797100  | -1.97657225547309 | -0.65794779775160 |
| H  | 0.68085045525683  | -1.62827137388623 | -2.29716292367322 |
| N  | -1.34754129729925 | -2.29139748817829 | -2.24779467334912 |
| H  | -1.59789847610908 | -1.89959792307042 | -3.16764525278398 |
| H  | -2.18603638685168 | -2.22828945664917 | -1.65195774217894 |
| H  | -1.12180997295163 | -3.28828771220245 | -2.37683856931169 |

**Table S24.** Cartesian coordinates (Å) of **10**.

60

Coordinates from ORCA-job Sbetg\_opt

|   |                  |                   |                  |
|---|------------------|-------------------|------------------|
| C | 4.89460851697022 | 0.16519763935237  | 3.05063833112827 |
| C | 6.06417974329654 | 0.00662793645666  | 2.27754708594714 |
| C | 6.72006692787441 | -1.23919000340695 | 2.24703865775204 |
| H | 7.63614970760871 | -1.35703831522475 | 1.65240538990495 |
| C | 6.21722917976285 | -2.32126349618842 | 2.98766199125045 |
| H | 6.73544221387963 | -3.28797316441423 | 2.96729662006990 |
| C | 5.07177868736997 | -2.15496709034109 | 3.78306148887941 |
| H | 4.69717887376147 | -2.98948023180726 | 4.39132366380888 |
| C | 4.40871357936503 | -0.91349095414486 | 3.81862461386039 |
| C | 6.59245464345549 | 1.19442296579208  | 1.49987441250438 |
| H | 7.64598158707622 | 1.02232649790240  | 1.18247079379440 |
| H | 5.97858037879930 | 1.34064991944044  | 0.59213409670791 |
| C | 7.39318822800402 | 2.45027778711776  | 3.43246896977012 |
| H | 8.44814921285130 | 2.40851809226980  | 3.07486369642993 |
| H | 7.20900071947283 | 1.55226778599439  | 4.04978477061574 |
| C | 7.18752209139683 | 3.71062601671799  | 4.26638961111038 |
| H | 6.17414944320296 | 3.67526880583362  | 4.74219727884444 |
| H | 7.93134529211479 | 3.73328484829341  | 5.08441504317597 |
| C | 6.61169859214417 | 3.63639367235710  | 1.46857349344635 |
| H | 5.84208615296375 | 3.59161199097151  | 0.67800914670504 |
| H | 7.61993693151602 | 3.66860814090921  | 0.99495505988568 |
| C | 6.41004839753118 | 4.88428321147946  | 2.32191577597671 |
| H | 6.57541998042568 | 5.78303937245287  | 1.69983408873585 |
| H | 5.35006405295904 | 4.91516997230134  | 2.67782611142520 |
| C | 7.21920989113984 | 6.12512053833983  | 4.23546116700601 |
| H | 7.97615697535758 | 6.13254938988975  | 5.04012443648377 |
| H | 6.21156289676712 | 6.23285616769059  | 4.70799794899079 |
| H | 7.39136234234460 | 7.00811256624554  | 3.59463165673624 |
| C | 3.17871746667388 | -0.69940179402813 | 4.67508411673123 |
| H | 2.28017456083575 | -0.72505340483755 | 4.03177221699168 |
| H | 3.08664553007644 | -1.49929526707843 | 5.44405070580666 |
| C | 4.25595745408837 | 0.73407798798487  | 6.32691450438397 |
| H | 5.22734025432397 | 0.48503831919154  | 5.86252235622582 |
| H | 4.06540621273142 | -0.00572356563423 | 7.13808548172689 |
| C | 4.30193752826517 | 2.13904483071361  | 6.91754854200847 |
| H | 5.05513238017308 | 2.17026163148157  | 7.72667134695898 |
| H | 4.63652412064913 | 2.85899995570301  | 6.12752751804466 |
| C | 1.90022572432500 | 1.03029967805419  | 5.83518568236010 |
| H | 1.57033302408717 | 0.31177357562765  | 6.62002231221456 |
| H | 1.18148054447078 | 1.01070485630462  | 4.99753294735398 |
| C | 1.97135293674971 | 2.43389460040201  | 6.42691817938703 |
| H | 2.16499277271299 | 3.16765838371201  | 5.60522702594305 |
| H | 0.99349634094537 | 2.69095375021930  | 6.87391526982539 |
| C | 3.03814640378679 | 3.82959092529591  | 8.09118604771344 |
| H | 3.79139368144247 | 3.83894371505863  | 8.89924650756760 |
| H | 2.05428302970012 | 4.06065214728776  | 8.53685708799603 |
| H | 3.29219392535247 | 4.64761144226243  | 7.37252117178976 |



|    |                  |                  |                   |
|----|------------------|------------------|-------------------|
| C  | 2.84615760553405 | 1.41076147525445 | 0.50863289816264  |
| H  | 3.26530617059722 | 0.37801859692445 | 0.45285101511147  |
| H  | 2.58570242688114 | 1.73307578381038 | -0.52042754819644 |
| C  | 1.60408252704024 | 1.40493005892735 | 1.40833122175460  |
| H  | 1.04407124524484 | 2.35787854079842 | 1.26466731885139  |
| H  | 0.92809637303083 | 0.56725908038243 | 1.13457830106404  |
| N  | 6.46622299785431 | 2.42686665854882 | 2.29192821520391  |
| N  | 7.35015356866130 | 4.90886027617355 | 3.44535110692696  |
| N  | 3.21110138316006 | 0.63520036337810 | 5.29546692282580  |
| N  | 3.00055395361927 | 2.51454768646749 | 7.46653935594932  |
| Sb | 3.86521192618489 | 2.09604944867286 | 3.10189470402776  |
| O  | 3.80306914350628 | 2.31392992969481 | 1.04781389435674  |
| O  | 1.99966454788392 | 1.25515227096560 | 2.76511417198618  |

**Table S25.** Cartesian coordinates (Å) of **10**, one arm uncoordinated.

60

Coordinates from ORCA-job Sbetg\_opt\_un1

|   |                   |                   |                  |
|---|-------------------|-------------------|------------------|
| C | 4.79153858351987  | -0.33111141764592 | 2.29751337822789 |
| C | 5.83142196778192  | 0.37336267540542  | 2.94295698053572 |
| C | 6.38798253166021  | -0.14891141819482 | 4.13215377157616 |
| H | 7.21321164283042  | 0.39974435102602  | 4.60354786954062 |
| C | 5.90029554263519  | -1.33743645693154 | 4.68929479365072 |
| H | 6.33844914267975  | -1.73134676252380 | 5.61486307174943 |
| C | 4.82634579122146  | -2.00824517204755 | 4.07901367898977 |
| H | 4.41599521318385  | -2.92181752133234 | 4.53031187673064 |
| C | 4.27198155088353  | -1.50877452859319 | 2.88879587588728 |
| C | 6.33977738125340  | 1.71499953600020  | 2.44165441023573 |
| H | 5.93130945302310  | 1.92382691342218  | 1.42595319373834 |
| H | 5.95402136884363  | 2.50855683739377  | 3.11388157942661 |
| C | 8.42840653376261  | 0.87556072084699  | 1.51509118604801 |
| H | 8.14450270144043  | 1.12127163570277  | 0.46636435725279 |
| H | 8.06577300582810  | -0.14576326960696 | 1.72930555294610 |
| C | 9.94491170402624  | 0.92674965303404  | 1.66979863599033 |
| H | 10.22277449973263 | 0.54915056839839  | 2.68687948556886 |
| H | 10.41582594970736 | 0.25830446808041  | 0.92484246571623 |
| C | 8.27757933045545  | 3.16333175567629  | 2.23146232089628 |
| H | 7.80717115577783  | 3.83637069473781  | 2.97311782567478 |
| H | 7.99824673823414  | 3.52988705930651  | 1.21327797245734 |
| C | 9.79657995607650  | 3.21703819597114  | 2.38323706577654 |
| H | 10.15587073664651 | 4.24056739222168  | 2.16592949818072 |
| H | 10.06294352862202 | 2.98317353544690  | 3.44575727515731 |
| C | 11.89031584174980 | 2.35946942498693  | 1.53063301801047 |
| H | 12.33871707122206 | 1.68482537978272  | 0.77922178497976 |
| H | 12.29191977084961 | 2.07148554581795  | 2.53457699764464 |
| H | 12.22781099500237 | 3.38866070086381  | 1.31181530608593 |
| C | 3.11443618646509  | -2.21305804835756 | 2.21610686494119 |
| H | 3.48605853762984  | -2.82896299095110 | 1.37738249104713 |
| H | 2.58487182955357  | -2.87878936116625 | 2.93218977901471 |
| C | 1.45765055023951  | -0.47779594842045 | 2.67980283455384 |
| H | 2.20168129742782  | 0.03513618732028  | 3.31460892895644 |
| H | 0.88991794053669  | -1.18760880369385 | 3.32127374578414 |

|    |                   |                   |                   |
|----|-------------------|-------------------|-------------------|
| C  | 0.49909592629673  | 0.53525036585251  | 2.06265720708083  |
| H  | -0.06348585695998 | 1.03676190840739  | 2.87162624562159  |
| H  | 1.08513352551366  | 1.32603034714168  | 1.53021844419261  |
| C  | 1.22102155962606  | -1.87592045112095 | 0.71096354726752  |
| H  | 0.63529673999626  | -2.64641161411211 | 1.25958427999999  |
| H  | 1.80797341519786  | -2.36072325549131 | -0.08689000446725 |
| C  | 0.27180829691118  | -0.84462512805897 | 0.11328873175881  |
| H  | 0.85270467270010  | -0.14592000455710 | -0.53982109957691 |
| H  | -0.46174280763401 | -1.36029119624032 | -0.53317815586495 |
| C  | -1.41770409330194 | 0.81357695518086  | 0.61608083834454  |
| H  | -1.97410568432502 | 1.29988337041907  | 1.43702975308037  |
| H  | -2.14377649373950 | 0.27297422958816  | -0.01667012433130 |
| H  | -0.94716732998284 | 1.61473387235669  | -0.00506004458141 |
| C  | 6.19529826463706  | -0.69502463531325 | -0.87459104795802 |
| H  | 6.63556876647750  | -1.17615663340466 | 0.03023141545516  |
| H  | 6.99936795618518  | -0.58099614953751 | -1.62945346530224 |
| C  | 5.05871925208560  | -1.57177955105082 | -1.41220056706834 |
| H  | 4.78078696627624  | -1.23382325465874 | -2.43504359019467 |
| H  | 5.37090929961328  | -2.63478468377144 | -1.46811721662560 |
| N  | 7.79811362923113  | 1.80144385704506  | 2.46413856601573  |
| N  | 10.43933915526696 | 2.28804492617006  | 1.45414631450199  |
| N  | 2.17905407815983  | -1.22976701653833 | 1.63137541770669  |
| N  | -0.44808582168074 | -0.12506359813920 | 1.16528817377579  |
| Sb | 3.87218613623682  | 0.32536406320976  | 0.41461955644758  |
| O  | 5.66169304975808  | 0.58480835917941  | -0.56251453603334 |
| O  | 3.93275017895203  | -1.48298785653281 | -0.53901855721762 |

**Table S26.** Cartesian coordinates (Å) of **10**, two arms uncoordinated.

60

Coordinates from ORCA-job Sbetg\_opt\_un2

|   |                   |                   |                   |
|---|-------------------|-------------------|-------------------|
| C | 4.92699785317124  | -1.48339780297875 | 1.49069896294203  |
| C | 5.93927364724269  | -0.51518775778400 | 1.27406204729776  |
| C | 5.90137809479058  | 0.70467631908415  | 1.97872397740592  |
| H | 6.71410570529981  | 1.42481647766121  | 1.82066676494036  |
| C | 4.85450271439124  | 0.97726000800293  | 2.87043473989567  |
| H | 4.83608484889009  | 1.92480431298790  | 3.42347336126557  |
| C | 3.81457092523573  | 0.05088327404717  | 3.02922528983455  |
| H | 2.97337234460743  | 0.25370976608240  | 3.70412811671782  |
| C | 3.83184465143038  | -1.17545826406803 | 2.33363383412719  |
| C | 7.04724158706675  | -0.71727075998982 | 0.25463885332980  |
| H | 7.01499776427384  | -1.76330189186088 | -0.14880130764154 |
| H | 6.85521236510073  | -0.05439724310789 | -0.61342657289489 |
| C | 8.78479227230488  | -1.22202750200649 | 1.89909560466766  |
| H | 8.90478242949145  | -2.28262254465418 | 1.58328303768517  |
| H | 7.99829147566532  | -1.18770342089706 | 2.67387247519909  |
| C | 10.09777461607693 | -0.69780586572173 | 2.47247235304470  |
| H | 9.92875718226009  | 0.32075083219737  | 2.90598451702164  |
| H | 10.43201518224185 | -1.35897991140127 | 3.29375545122841  |
| C | 9.39333806212010  | -0.36575632285561 | -0.26562452566666 |
| H | 9.06060547317137  | 0.29809215912868  | -1.08565974000402 |
| H | 9.55624440474588  | -1.38423083601747 | -0.69553480740017 |

|    |                   |                   |                   |
|----|-------------------|-------------------|-------------------|
| C  | 10.71048078061143 | 0.15138623493554  | 0.31011440721114  |
| H  | 11.49472302961479 | 0.11702513030318  | -0.46920268654269 |
| H  | 10.57823038006929 | 1.22211981339854  | 0.61046438530893  |
| C  | 12.42286084104560 | -0.24773222079645 | 1.97039838801904  |
| H  | 12.73419614618747 | -0.92485497918368 | 2.78601165220854  |
| H  | 12.40856724280412 | 0.79500581437864  | 2.37534284918484  |
| H  | 13.18930912935265 | -0.29361020750212 | 1.17589714778251  |
| C  | 2.62827036134791  | -2.08931719317350 | 2.48062791994893  |
| H  | 1.76118030677635  | -1.60536874119897 | 1.98705616998766  |
| H  | 2.80002101547538  | -3.05163665952630 | 1.94084569168480  |
| C  | 3.29270947493309  | -3.00547660625384 | 4.64902823133860  |
| H  | 4.24940257714454  | -2.46659580777685 | 4.52774680344191  |
| H  | 3.43872059592974  | -4.04292100259708 | 4.27298800373173  |
| C  | 2.89648905434088  | -3.04033380591712 | 6.12185576554300  |
| H  | 3.65649285729696  | -3.60216619979334 | 6.69675437768418  |
| H  | 2.87487029093759  | -1.99465889340425 | 6.52180069186440  |
| C  | 0.97156512927617  | -2.97546297685709 | 4.02568444702218  |
| H  | 0.99895044173330  | -4.01640934073572 | 3.62037633323010  |
| H  | 0.21013568594339  | -2.41099182601983 | 3.45505065496188  |
| C  | 0.57508385911170  | -3.02136260833701 | 5.50052418219996  |
| H  | 0.40929607613262  | -1.97478696992682 | 5.86300786299414  |
| H  | -0.37938166363457 | -3.56935470915934 | 5.61197020412626  |
| C  | 1.22379670864437  | -3.81995884101086 | 7.68886622863529  |
| H  | 1.99818340583208  | -4.38342394550933 | 8.23986476781822  |
| H  | 0.27106055255627  | -4.37281748461171 | 7.77563832097120  |
| H  | 1.09442484230778  | -2.82985975735061 | 8.19349718909269  |
| C  | 6.86333049142218  | -4.26918980074120 | 2.48911742942577  |
| H  | 6.76425908650937  | -3.36498075871530 | 3.13070159692231  |
| H  | 7.79608926456784  | -4.79715508425433 | 2.76617345264015  |
| C  | 5.63895764107420  | -5.16848224400948 | 2.66866441732256  |
| H  | 5.83226016162908  | -6.16619183725829 | 2.21878102587432  |
| H  | 5.40508739124948  | -5.30901105527457 | 3.74324861163036  |
| N  | 8.36391438984612  | -0.38095627479804 | 0.77247798786470  |
| N  | 11.13601603830915 | -0.67315554438790 | 1.44060567131488  |
| N  | 2.26196447460286  | -2.30555537379835 | 3.87538224339166  |
| N  | 1.60164518783633  | -3.70321323499450 | 6.28856428912356  |
| Sb | 5.10229658916923  | -3.42213606742678 | 0.47733551955809  |
| O  | 6.95967499523992  | -3.89628066675645 | 1.10790182077009  |
| O  | 4.50244535019495  | -4.55308881480754 | 2.04691901171601  |

**Table S27.** Cartesian coordinates (Å) of **11**.

60

Coordinates from ORCA-job Bietg\_opt

|   |                  |                   |                  |
|---|------------------|-------------------|------------------|
| C | 4.93533088394912 | 0.15883896834195  | 3.08309827959348 |
| C | 6.09431301628407 | 0.00843032718887  | 2.29640011378944 |
| C | 6.75176170431995 | -1.23691166745271 | 2.25867357156988 |
| H | 7.66138031097549 | -1.35597998260971 | 1.65411320418584 |
| C | 6.25400508360654 | -2.32046718363295 | 3.00196534889510 |
| H | 6.77264956278994 | -3.28680841152352 | 2.97536548531270 |
| C | 5.10967056671051 | -2.16070752568081 | 3.80151049333384 |
| H | 4.73628729560823 | -3.00126052070623 | 4.40248528501751 |

|    |                  |                   |                   |
|----|------------------|-------------------|-------------------|
| C  | 4.44504824314352 | -0.91955540421416 | 3.84498347488554  |
| C  | 6.59588067997058 | 1.19540540981554  | 1.49773925050510  |
| H  | 7.63961911404473 | 1.02585613213177  | 1.14874105352418  |
| H  | 5.95188929682371 | 1.33305663219252  | 0.60944595885906  |
| C  | 7.43649327418397 | 2.47445759273267  | 3.40307783263632  |
| H  | 8.48619766546189 | 2.43937399547132  | 3.03004256469626  |
| H  | 7.26899146052195 | 1.57965948270310  | 4.02942243756550  |
| C  | 7.23156908461111 | 3.73924141163264  | 4.23029332782052  |
| H  | 6.22269094347409 | 3.69914284045966  | 4.71990868571589  |
| H  | 7.98231900702637 | 3.77499799834600  | 5.04130012208016  |
| C  | 6.62322068835038 | 3.63840343916906  | 1.43927927212298  |
| H  | 5.84305735583768 | 3.58357770534045  | 0.65945853207339  |
| H  | 7.62491694021824 | 3.66848228085958  | 0.95215392107763  |
| C  | 6.42940356583155 | 4.89461898835171  | 2.28232143085964  |
| H  | 6.58840903074732 | 5.78806485437861  | 1.65130683347036  |
| H  | 5.37002428937390 | 4.93283836123851  | 2.64472534731963  |
| C  | 7.24476812690241 | 6.15443013113402  | 4.18063307047160  |
| H  | 8.00771285398721 | 6.17190602509874  | 4.97925112308906  |
| H  | 6.23999486915866 | 6.26125091342676  | 4.65987108329995  |
| H  | 7.40747558820394 | 7.03261746488046  | 3.53104077432056  |
| C  | 3.20027317412828 | -0.71377482731159 | 4.68429912213727  |
| H  | 2.31536733885990 | -0.72563596349539 | 4.02147210990687  |
| H  | 3.09068933478378 | -1.52620290349360 | 5.43764314542794  |
| C  | 4.24606537462342 | 0.70558256153235  | 6.37421684138603  |
| H  | 5.22401326216168 | 0.46155103296744  | 5.92134716255387  |
| H  | 4.04838821348771 | -0.03628443339079 | 7.18177564895746  |
| C  | 4.27926411440540 | 2.10980880882234  | 6.96761801201020  |
| H  | 5.02371701493825 | 2.14631342804701  | 7.78444061608023  |
| H  | 4.62197910577726 | 2.83419532801487  | 6.18206265869699  |
| C  | 1.89417392045680 | 0.98704088165391  | 5.85958025281955  |
| H  | 1.56288482971603 | 0.26119062430961  | 6.63700587741655  |
| H  | 1.18346908066310 | 0.96694273673065  | 5.01475628566933  |
| C  | 1.94732125551763 | 2.38807259576513  | 6.45944157680901  |
| H  | 2.13238391638251 | 3.13003076581063  | 5.64086817745592  |
| H  | 0.96529953005431 | 2.63408156055767  | 6.90309074419597  |
| C  | 2.99451286395466 | 3.79531239662977  | 8.12634358524990  |
| H  | 3.74135390875532 | 3.81080912154098  | 8.94006734691234  |
| H  | 2.00549136275946 | 4.01970547231101  | 8.56354423944825  |
| H  | 3.24821902708581 | 4.61445626041191  | 7.40846948725936  |
| C  | 2.79726507312752 | 1.44463242775510  | 0.49707924920364  |
| H  | 3.21910694853931 | 0.41088102010800  | 0.46446028448324  |
| H  | 2.51130635891628 | 1.72912992365084  | -0.53811283666837 |
| C  | 1.55344728950339 | 1.44414193313899  | 1.39962368080773  |
| H  | 1.01032031828255 | 2.40868557535809  | 1.25816470219736  |
| H  | 0.86873569845429 | 0.62329847734955  | 1.09244215612905  |
| N  | 6.49078720035858 | 2.43891991626924  | 2.27917525080424  |
| N  | 7.37382520222128 | 4.93209752757433  | 3.40005954515329  |
| N  | 3.21446679034045 | 0.61053219630050  | 5.33059438461737  |
| N  | 2.97162848394896 | 2.48042265075644  | 7.50126245375737  |
| Bi | 3.86359472144011 | 2.16874898019182  | 3.14842538758153  |
| O  | 3.75980882084789 | 2.36736899782088  | 0.98206612952265  |

O 1.91415296339097 1.26135666723850 2.75916484392678

**Table S28.** Cartesian coordinates (Å) of **11**, one arm uncoordinated.

60

Coordinates from ORCA-job Bietg\_opt\_un1

|   |                   |                   |                   |
|---|-------------------|-------------------|-------------------|
| C | 4.78760190052229  | -0.27743015722124 | 2.35029547967050  |
| C | 5.82721677234147  | 0.41840270845801  | 3.00020436679089  |
| C | 6.37625561678441  | -0.11171435592461 | 4.18977332386331  |
| H | 7.20190992154331  | 0.42877714944242  | 4.66997713978534  |
| C | 5.88098596879408  | -1.30350494653255 | 4.73407094755326  |
| H | 6.31204068813023  | -1.70580376558888 | 5.65935623906794  |
| C | 4.81336171797669  | -1.97169380642436 | 4.10865953026129  |
| H | 4.40519295894925  | -2.89243498323285 | 4.54760933479552  |
| C | 4.26468931575258  | -1.46362862548638 | 2.91840115327496  |
| C | 6.34933116640851  | 1.75186974086105  | 2.49214263791842  |
| H | 5.92765446801606  | 1.96462607789287  | 1.47942453991888  |
| H | 5.98616703873446  | 2.55604406517099  | 3.16407674560261  |
| C | 8.40828518606186  | 0.87304182388005  | 1.53634675639737  |
| H | 8.10878980877835  | 1.11498490130292  | 0.49156086890248  |
| H | 8.03388575714897  | -0.14095614330662 | 1.76414291485634  |
| C | 9.92743457842812  | 0.90232248433863  | 1.66740576700814  |
| H | 10.21600058737937 | 0.52665650322320  | 2.68227159263830  |
| H | 10.37592351442446 | 0.22238282145204  | 0.91917139213185  |
| C | 8.30471470352960  | 3.16855525147651  | 2.24122237294117  |
| H | 7.85642924283176  | 3.85330183916198  | 2.98588110730786  |
| H | 8.01589231785642  | 3.53308754502670  | 1.22485578936636  |
| C | 9.82655220362321  | 3.19863806196450  | 2.36940784660405  |
| H | 10.19864926171437 | 4.21517384772521  | 2.14114514279032  |
| H | 10.10521070399344 | 2.96613872814511  | 3.42913721045733  |
| C | 11.89252202467855 | 2.30378433737412  | 1.48875270680357  |
| H | 12.31820421591014 | 1.61776422986579  | 0.73448450115501  |
| H | 12.30560995415954 | 2.01548573273432  | 2.48795476866325  |
| H | 12.24246316153236 | 3.32624939413177  | 1.25820482725129  |
| C | 3.12903237689974  | -2.18266718198007 | 2.22097055880488  |
| H | 3.52761806057981  | -2.76558311285205 | 1.37096207032206  |
| H | 2.61839908869303  | -2.88250694513685 | 2.91867183125242  |
| C | 1.42188516013502  | -0.49751242480339 | 2.69726446209151  |
| H | 2.15094255803751  | 0.01705286292026  | 3.34794779013408  |
| H | 0.85258340181346  | -1.21976274086059 | 3.32414007398154  |
| C | 0.46086865387020  | 0.51120342555986  | 2.07719960391514  |
| H | -0.11724315061732 | 1.00431149972277  | 2.88019428176018  |
| H | 1.04720361576561  | 1.31453727060962  | 1.55884293195039  |
| C | 1.22637192198092  | -1.88181028190248 | 0.71688783830535  |
| H | 0.64688479659340  | -2.66656154549458 | 1.25245383439336  |
| H | 1.82854512435354  | -2.35036110562218 | -0.07971410005111 |
| C | 0.26759453304399  | -0.86094659620203 | 0.11583060950486  |
| H | 0.84355995401815  | -0.15413393335162 | -0.53572788396785 |
| H | -0.45639140809017 | -1.38173863182291 | -0.53704005444903 |
| C | -1.43726861589515 | 0.78547657983227  | 0.60541597238876  |
| H | -2.00692857233459 | 1.26392472663298  | 1.42171961121518  |
| H | -2.15112961453295 | 0.24266511544882  | -0.03898614234670 |

|    |                   |                   |                   |
|----|-------------------|-------------------|-------------------|
| H  | -0.96467401516254 | 1.59298825264042  | -0.00645281258749 |
| C  | 6.22527173433767  | -0.68581874423929 | -0.92542410982430 |
| H  | 6.64022674022943  | -1.16407489949008 | -0.00592888959264 |
| H  | 7.04138855697519  | -0.62677850542351 | -1.67594574944510 |
| C  | 5.07859441747531  | -1.55403418345482 | -1.46260770404683 |
| H  | 4.80529548117770  | -1.20287306205303 | -2.48351845194948 |
| H  | 5.40517765535554  | -2.61302707538484 | -1.53718096673537 |
| N  | 7.80707725785380  | 1.81593290791229  | 2.48885190991501  |
| N  | 10.43957956911480 | 2.25458814288285  | 1.43583588980190  |
| N  | 2.16275331859599  | -1.22314669219973 | 1.64782562726420  |
| N  | -0.46632579944868 | -0.14747912692331 | 1.16093935936949  |
| Bi | 3.85421805510589  | 0.42090793750466  | 0.37813184987750  |
| O  | 5.74702319530027  | 0.62035521811362  | -0.65083358295335 |
| O  | 3.94994000477154  | -1.49679885249378 | -0.59535670707616 |

**Table S29.** Cartesian coordinates (Å) of **11**, two arms uncoordinated.

60

Coordinates from ORCA-job Bietg\_opt\_un2

|   |                   |                   |                   |
|---|-------------------|-------------------|-------------------|
| C | 4.88850772916527  | -1.42506038482843 | 1.44803873232306  |
| C | 5.90705233181857  | -0.46567622424991 | 1.23500229585952  |
| C | 5.87070423825901  | 0.75406752275215  | 1.94140594697909  |
| H | 6.68542925418970  | 1.47313011624784  | 1.78837087385514  |
| C | 4.82333661902783  | 1.02669301268062  | 2.83322080765522  |
| H | 4.80620248913443  | 1.97416659102033  | 3.38641364115957  |
| C | 3.78576774570712  | 0.09817662864615  | 2.99972707254618  |
| H | 2.95135155013762  | 0.29887146205963  | 3.68372389555295  |
| C | 3.80178006329351  | -1.12746412627908 | 2.30229340142988  |
| C | 7.02786616900728  | -0.68185882132307 | 0.23278595436997  |
| H | 6.98927346597742  | -1.73007271644710 | -0.16942573427734 |
| H | 6.86266279278908  | -0.01926029843018 | -0.64082381647692 |
| C | 8.72754893983346  | -1.21725920879845 | 1.90586265754120  |
| H | 8.83196789069520  | -2.27902042880777 | 1.58931077323203  |
| H | 7.92895465087449  | -1.17066370041070 | 2.66736427079300  |
| C | 10.03967397382717 | -0.71735441493227 | 2.50173664724975  |
| H | 9.88225728950211  | 0.30330980529844  | 2.93470973518232  |
| H | 10.34815452839513 | -1.38621107938198 | 3.32676155219491  |
| C | 9.38742377165898  | -0.36732778816788 | -0.24695922100725 |
| H | 9.08043035213479  | 0.30385588929686  | -1.07107711728194 |
| H | 9.53969722900381  | -1.38807999919484 | -0.67572913019486 |
| C | 10.70367757392449 | 0.12519633127150  | 0.35214408020885  |
| H | 11.49998481590708 | 0.07880249098038  | -0.41421751707310 |
| H | 10.58534176639999 | 1.19756315089379  | 0.65274563793175  |
| C | 12.38090007916408 | -0.30922483659790 | 2.03925050440397  |
| H | 12.66611102866765 | -0.99432880969321 | 2.85772107840635  |
| H | 12.37930609859986 | 0.73245002237452  | 2.44721478361802  |
| H | 13.15933997030263 | -0.36715709575441 | 1.25727782825820  |
| C | 2.61682173377815  | -2.06153012894051 | 2.46891382966777  |
| H | 1.73221051896110  | -1.60233412660232 | 1.98307109975450  |
| H | 2.80393960132171  | -3.02507047314869 | 1.93140332343484  |
| C | 3.32825906754092  | -2.95800604365689 | 4.63086658907153  |
| H | 4.27115782164912  | -2.39770282910924 | 4.49991963067042  |

|    |                   |                   |                  |
|----|-------------------|-------------------|------------------|
| H  | 3.49476335512650  | -3.98989824931281 | 4.24958462091793 |
| C  | 2.94959694375484  | -2.99970040023968 | 6.10798503246676 |
| H  | 3.72757912946340  | -3.54600642587589 | 6.67360062328805 |
| H  | 2.91202011552917  | -1.95452391830123 | 6.50836549682501 |
| C  | 0.99823866282148  | -2.97654367081411 | 4.03592436476900 |
| H  | 1.04239554701534  | -4.01773157330522 | 3.63279308378176 |
| H  | 0.21856838481333  | -2.42893910955894 | 3.47350819549049 |
| C  | 0.62111274535208  | -3.02676971578880 | 5.51559379743296 |
| H  | 0.44013704617581  | -1.98262322274661 | 5.87809634384916 |
| H  | -0.32152879653546 | -3.59222252990309 | 5.63982919053820 |
| C  | 1.31193039835440  | -3.80878671268674 | 7.69670861667799 |
| H  | 2.10357036159602  | -4.35666689869170 | 8.23879813027241 |
| H  | 0.37082225429510  | -4.37914130061830 | 7.79634788834167 |
| H  | 1.17051461402519  | -2.82028977616549 | 8.20136435077323 |
| C  | 6.86672980784948  | -4.32249209719415 | 2.45940833469980 |
| H  | 6.75341667412667  | -3.41793200571966 | 3.09994641456433 |
| H  | 7.79239180285224  | -4.85088720456818 | 2.76428038433192 |
| C  | 5.64602298835928  | -5.23011130054206 | 2.64167420469565 |
| H  | 5.84336724274194  | -6.21622118079067 | 2.16558261971197 |
| H  | 5.45510585130846  | -5.40152799167387 | 3.72176840792591 |
| N  | 8.34011563263215  | -0.36693259472955 | 0.77322443382098 |
| N  | 11.09530394654890 | -0.70926390880094 | 1.48724973978378 |
| N  | 2.27309785767212  | -2.28131897239002 | 3.86754845304238 |
| N  | 1.67002279160882  | -3.68743241879878 | 6.29166112978968 |
| Bi | 5.05505858929108  | -3.45258431288023 | 0.39213571556434 |
| O  | 7.00030742493533  | -3.95426842542532 | 1.08460735472757 |
| O  | 4.48000926063754  | -4.62091108624532 | 2.08057446487845 |

**Table S30.** Cartesian coordinates (Å) of **12**.

72

Coordinates from ORCA-job Sbpin\_opt

|   |                   |                  |                   |
|---|-------------------|------------------|-------------------|
| C | 10.02546382736389 | 4.93313105614460 | 7.29279362169586  |
| C | 10.87074706157428 | 3.84853933781700 | 6.97773678655492  |
| C | 12.24050103549354 | 4.07351218241180 | 6.74286217716080  |
| H | 12.89807336187374 | 3.22632164576014 | 6.50505370263082  |
| C | 12.76775985123025 | 5.37262529600788 | 6.82451064097820  |
| H | 13.83658426862577 | 5.54313802474023 | 6.64572220637822  |
| C | 11.93269588047828 | 6.44836646293673 | 7.16775520926426  |
| H | 12.34931420171162 | 7.46022895183697 | 7.26427104391986  |
| C | 10.56164881137385 | 6.23282104308741 | 7.40458827828033  |
| C | 10.27571569952723 | 2.45926408657274 | 6.88308283376472  |
| H | 9.75807228834875  | 2.35291000228828 | 5.91196004769792  |
| H | 11.07249189161756 | 1.68293741916985 | 6.93727071516582  |
| C | 9.84331605597014  | 2.16881250270991 | 9.26661871113880  |
| H | 10.42440131131172 | 3.09044044411564 | 9.45261030399099  |
| H | 10.54492454285829 | 1.30494266098370 | 9.32771645619523  |
| C | 8.75222773747798  | 2.01632568870777 | 10.32172780677716 |
| H | 9.22087784436190  | 1.89432699491965 | 11.31596788883273 |
| H | 8.14100864769243  | 2.95396081366022 | 10.35702505340191 |
| C | 7.32581234352607  | 0.95176112508718 | 8.70931462178074  |
| H | 6.63057255398907  | 1.82495733081754 | 8.63895270259565  |

|   |                   |                   |                   |
|---|-------------------|-------------------|-------------------|
| H | 6.73128432820579  | 0.04069525275888  | 8.51268932495033  |
| C | 8.40432204718012  | 1.08918823247618  | 7.64046523280982  |
| H | 9.01594553595498  | 0.15828596286386  | 7.60640807945725  |
| H | 7.93622089845027  | 1.25475957606690  | 6.65449894760464  |
| C | 6.90878496797180  | 0.64975638062513  | 11.07317350003528 |
| H | 6.19068404967832  | 1.50356509202922  | 11.14859981853947 |
| H | 7.39441148790663  | 0.52400228874690  | 12.05749480059910 |
| H | 6.32895375110255  | -0.26531583234445 | 10.85759471344228 |
| C | 9.63659925326195  | 7.37380656998506  | 7.77310394585894  |
| H | 10.21767950977136 | 8.25316027878064  | 8.13288854220981  |
| H | 9.06279218134470  | 7.67909713915759  | 6.87866959048746  |
| C | 9.27066977550603  | 6.68840481329050  | 10.08566335699999 |
| H | 9.73767094834808  | 7.62240085370388  | 10.47481914287710 |
| H | 10.07133873726958 | 5.93797125887646  | 9.95516616863187  |
| C | 8.23476074138814  | 6.18010232245224  | 11.08306619877983 |
| H | 7.87772750380056  | 5.16909255769583  | 10.75975439564514 |
| H | 8.71166538207115  | 6.05624364818397  | 12.07315858354837 |
| C | 6.50584170272651  | 7.35551339203934  | 9.89993231008178  |
| H | 5.69623600914111  | 8.09908099030919  | 10.01807210857218 |
| H | 6.04346006433075  | 6.42119184817173  | 9.49496195208351  |
| C | 7.52685705575589  | 7.87841380921239  | 8.89564648606586  |
| H | 7.06214559688049  | 7.96203274511357  | 7.89798416238755  |
| H | 7.89024678700737  | 8.88052133948077  | 9.21985657639217  |
| C | 6.15276626265539  | 6.68390052902461  | 12.19761704282233 |
| H | 5.35512528866530  | 7.44096044623833  | 12.30113936222653 |
| H | 6.64452782625252  | 6.56751874675143  | 13.18005439798492 |
| H | 5.67139405752307  | 5.70946326879506  | 11.93469425318889 |
| C | 7.34301136335876  | 4.33634945903556  | 4.75377029854186  |
| C | 6.58556324410831  | 5.63521512896009  | 5.24560515092161  |
| C | 8.70325738117461  | 4.69332733561953  | 4.12341866310725  |
| H | 9.27887906161725  | 5.37007940050800  | 4.77668224279090  |
| H | 8.58859151496916  | 5.17129005469310  | 3.13429360959883  |
| H | 9.28797503623230  | 3.76683319114494  | 3.98646122570210  |
| C | 6.51528481282226  | 3.49853451276907  | 3.76855439260232  |
| H | 7.11613559595933  | 2.63986680937192  | 3.41962563549758  |
| H | 6.21471756508746  | 4.08721946217000  | 2.88254804716193  |
| H | 5.61043991022183  | 3.10072975015347  | 4.25634844962371  |
| C | 6.58690949858140  | 6.76295560984416  | 4.20396856758982  |
| H | 6.00285296613976  | 7.61916255084161  | 4.58591161654024  |
| H | 6.13360978194130  | 6.43761586576266  | 3.24988530718861  |
| H | 7.61339259714104  | 7.11329236419083  | 4.00848202557224  |
| C | 5.13648813476328  | 5.31452107663831  | 5.66478358335759  |
| H | 5.10644992993222  | 4.43964254606613  | 6.33927492473608  |
| H | 4.48437646139087  | 5.10218219074961  | 4.79900039138207  |
| H | 4.72461833579794  | 6.18509012314810  | 6.20441719402055  |
| N | 9.25628880583673  | 2.25483588768293  | 7.92122108140058  |
| N | 7.92039260488944  | 0.84665265552948  | 10.04433794211278 |
| N | 8.65150952477592  | 6.93799324203458  | 8.77474482431866  |
| N | 7.12547356954629  | 7.12396969514126  | 11.20733577715080 |
| O | 7.29908109178658  | 6.13026003608415  | 6.38629206737759  |
| O | 7.56080684022933  | 3.51005374415419  | 5.90886702945165  |



Sb            7.89065140513986        4.59400572744578        7.62898914976524

**Table S31.**     Cartesian coordinates (Å) of **13**.

72

Coordinates from ORCA-job Bipin\_opt

|   |                   |                   |                   |
|---|-------------------|-------------------|-------------------|
| C | 10.07373431108878 | 4.91615192288438  | 7.34461176769976  |
| C | 10.90499727680909 | 3.82623322454738  | 7.01913246633567  |
| C | 12.27708830836969 | 4.04403386005241  | 6.78779819039617  |
| H | 12.93053954672938 | 3.19604187098253  | 6.54082565484630  |
| C | 12.81148120458812 | 5.34032553768633  | 6.87992909296143  |
| H | 13.88177455546166 | 5.50498936026217  | 6.70438721164838  |
| C | 11.98214622564141 | 6.42236017835465  | 7.22002132730862  |
| H | 12.40506026194799 | 7.43224478826960  | 7.31188556770272  |
| C | 10.60855134621624 | 6.21462394025550  | 7.45286003469517  |
| C | 10.29084202788102 | 2.44643988611479  | 6.89013495043795  |
| H | 9.76148372446413  | 2.37839196617909  | 5.92175970831385  |
| H | 11.07775869593628 | 1.65870209768935  | 6.91082644680916  |
| C | 9.86863297595022  | 2.08714788740658  | 9.26901583387547  |
| H | 10.46754199191925 | 2.99302820373315  | 9.47384201757871  |
| H | 10.55312642808576 | 1.20857024190366  | 9.30965704764570  |
| C | 8.77573582232105  | 1.93154877243300  | 10.32152448692394 |
| H | 9.23944621312295  | 1.78521563272695  | 11.31463751394227 |
| H | 8.17860569598617  | 2.87989773186156  | 10.37602593048998 |
| C | 7.33681645642237  | 0.91092572232842  | 8.68803721222313  |
| H | 6.64195916829778  | 1.78759429068982  | 8.63214284356826  |
| H | 6.73592129226737  | 0.00780513735578  | 8.47586697536531  |
| C | 8.41542773862474  | 1.06245839646246  | 7.62090755285434  |
| H | 9.01779026351244  | 0.12680050471371  | 7.56386677797928  |
| H | 7.94668557838576  | 1.25618513925610  | 6.64003257274770  |
| C | 6.91053219775681  | 0.57854714454075  | 11.04601453100841 |
| H | 6.20117278581599  | 1.43880478950098  | 11.13273038465909 |
| H | 7.39252817907379  | 0.43252162635754  | 12.02914997240599 |
| H | 6.32159689422012  | -0.32658133172025 | 10.81450698569343 |
| C | 9.67905756278013  | 7.36418039878553  | 7.78757557145755  |
| H | 10.25680563747657 | 8.25562646749013  | 8.12191554349715  |
| H | 9.10919848656316  | 7.63977891432257  | 6.88074644427414  |
| C | 9.28871747765304  | 6.74360437661776  | 10.11841153279024 |
| H | 9.75009157354105  | 7.68466146193976  | 10.49704196215170 |
| H | 10.09091074850937 | 5.99083823700336  | 10.01391369754905 |
| C | 8.23755933026219  | 6.25451148524793  | 11.10964824007936 |
| H | 7.88151805690738  | 5.23715818002861  | 10.79777489122563 |
| H | 8.69806244512043  | 6.14196964304437  | 12.10866193633197 |
| C | 6.53038697812878  | 7.42354663707755  | 9.88562726016589  |
| H | 5.72551968619211  | 8.17482696168626  | 9.98359945345406  |
| H | 6.06004216751259  | 6.48859659508140  | 9.48697920310426  |
| C | 7.56736526871005  | 7.92009759581374  | 8.88455793965336  |
| H | 7.11383486275024  | 7.98651002278833  | 7.88023386002501  |
| H | 7.93486224233763  | 8.92525839752812  | 9.19396617416232  |
| C | 6.14042419635298  | 6.78145185712262  | 12.18594014689028 |
| H | 5.34623625949054  | 7.54458983660449  | 12.26713319460307 |
| H | 6.61739371351033  | 6.67535805523821  | 13.17664837405781 |

|    |                  |                  |                   |
|----|------------------|------------------|-------------------|
| H  | 5.65658325394849 | 5.80641693350701 | 11.92898990737872 |
| C  | 7.29539745167386 | 4.33956597367957 | 4.74251422116057  |
| C  | 6.53580645205603 | 5.64419351699462 | 5.23774680915889  |
| C  | 8.66934702087371 | 4.70451429954445 | 4.14529886815893  |
| H  | 9.23616167809171 | 5.35852731774080 | 4.82914876074455  |
| H  | 8.57852775775590 | 5.21244132263929 | 3.16869860884632  |
| H  | 9.24980378704320 | 3.77772613043095 | 3.99244875591192  |
| C  | 6.47806391741396 | 3.53823706896484 | 3.71593908539720  |
| H  | 7.07654147933795 | 2.68009863457919 | 3.36140744970643  |
| H  | 6.20408458560160 | 4.14997988526895 | 2.83703952775201  |
| H  | 5.55822722211567 | 3.13971119863536 | 4.17457683056335  |
| C  | 6.51931664474118 | 6.75798516635961 | 4.17814633174511  |
| H  | 5.92723806909755 | 7.61230714606757 | 4.55233314092612  |
| H  | 6.06758947224851 | 6.41806614120802 | 3.22846330942643  |
| H  | 7.54137693296161 | 7.11816210640825 | 3.97707470063928  |
| C  | 5.08948713609890 | 5.31096179494994 | 5.66126091025521  |
| H  | 5.06935750031555 | 4.43370776497819 | 6.33377445395524  |
| H  | 4.43469421051616 | 5.09132497895579 | 4.79924414289607  |
| H  | 4.67196440443036 | 6.17820222542922 | 6.20204586648698  |
| N  | 9.27644860109847 | 2.21416375084887 | 7.92997827163398  |
| N  | 7.92571295113234 | 0.78221695225956 | 10.02230770832326 |
| N  | 8.68382206631691 | 6.96621869420389 | 8.79706104619812  |
| N  | 7.12929059375481 | 7.20084704755852 | 11.20301310383332 |
| O  | 7.24084901876553 | 6.16904666668987 | 6.36520616601173  |
| O  | 7.48629124735549 | 3.47468620686920 | 5.86823850727804  |
| Bi | 7.85013068455964 | 4.57193242897925 | 7.70507003202307  |

**Table S32.** Cartesian coordinates (Å) of **14**.

64

Coordinates from ORCA-job Sbcats\_opt

|   |                  |                   |                  |
|---|------------------|-------------------|------------------|
| C | 4.84808373718883 | 0.21810556218915  | 3.02856401815753 |
| C | 6.00617426478038 | 0.02429818400217  | 2.24908477553599 |
| C | 6.59225596721885 | -1.25340782983342 | 2.17642498081603 |
| H | 7.49991453938809 | -1.40370018279945 | 1.57660291894763 |
| C | 6.02602765597610 | -2.32969061938357 | 2.87894032069183 |
| H | 6.48814761962565 | -3.32295515388292 | 2.82386259051976 |
| C | 4.88775971365014 | -2.12961663459244 | 3.67706413401720 |
| H | 4.46316778137702 | -2.96461238205405 | 4.25039790202215 |
| C | 4.29539910310214 | -0.85530397085442 | 3.75585714910903 |
| C | 6.58822265939887 | 1.20755531054145  | 1.50570897852393 |
| H | 7.64767599097675 | 1.01796202616692  | 1.22380112096112 |
| H | 6.00944063850887 | 1.37540563853075  | 0.57925477979435 |
| C | 7.37685801717241 | 2.42200692147336  | 3.46967208798936 |
| H | 8.43229361716505 | 2.34285324714606  | 3.12373304736150 |
| H | 7.15110986778256 | 1.52710929649517  | 4.07743444986587 |
| C | 7.20838720820302 | 3.68490860577589  | 4.30789167956680 |
| H | 6.19012206640397 | 3.68642377843953  | 4.77559123700660 |
| H | 7.94320135586274 | 3.67317322934240  | 5.13411517814298 |
| C | 6.67053601589128 | 3.65042047835969  | 1.50098330008007 |
| H | 5.91728726751046 | 3.64002618757243  | 0.69460943728163 |
| H | 7.68807941808894 | 3.64573195137656  | 1.04933348905606 |

|    |                   |                   |                   |
|----|-------------------|-------------------|-------------------|
| C  | 6.50085117413184  | 4.89780847764284  | 2.36113144286446  |
| H  | 6.70733585888983  | 5.79347693188067  | 1.74734020421655  |
| H  | 5.43748004652851  | 4.96736412396227  | 2.70161294221918  |
| C  | 7.33325307268691  | 6.09679571672723  | 4.29277976776981  |
| H  | 8.08124145053344  | 6.07029242249179  | 5.10521056712414  |
| H  | 6.32563784674298  | 6.24105667222194  | 4.75494379497593  |
| H  | 7.54687775251962  | 6.97541816190727  | 3.65879796130870  |
| C  | 3.07095867506935  | -0.60020993912041 | 4.60853819906305  |
| H  | 2.17395506261482  | -0.58654982269131 | 3.96314307703533  |
| H  | 2.94107429789411  | -1.40263111342597 | 5.36820734055052  |
| C  | 4.18718122099116  | 0.76089695459637  | 6.29751989528756  |
| H  | 5.15387032354915  | 0.47696603053131  | 5.84354320375980  |
| H  | 3.95007220331082  | 0.01572545045698  | 7.09032233385891  |
| C  | 4.28342229027548  | 2.15130128149252  | 6.91617544827947  |
| H  | 5.02452100910996  | 2.13403978128733  | 7.73669064678776  |
| H  | 4.66289729964290  | 2.87216461024345  | 6.14685402105705  |
| C  | 1.85310823253814  | 1.16643304537468  | 5.78007978082289  |
| H  | 1.48788195856612  | 0.44823280256002  | 6.54842201320185  |
| H  | 1.14035108184527  | 1.18723552512865  | 4.93783190508428  |
| C  | 1.97440761284924  | 2.55491057852411  | 6.39854081637953  |
| H  | 2.20767288011526  | 3.29649156420778  | 5.59407059989192  |
| H  | 1.00192917751677  | 2.84357513367203  | 6.83740891265022  |
| C  | 3.07493867688360  | 3.87138530560167  | 8.10592027268176  |
| H  | 3.81268264383941  | 3.83077444526504  | 8.92707240008032  |
| H  | 2.094084444920022 | 4.1355538255596   | 8.53919789619044  |
| H  | 3.37692378077051  | 4.69210084159748  | 7.40953805648206  |
| C  | 2.84501462051688  | 1.70549998402472  | 0.49120296012393  |
| C  | 1.84978435640296  | 1.19651363124068  | 1.37721183609979  |
| N  | 6.46649760101957  | 2.43632441099281  | 2.31103161921617  |
| N  | 7.42531646453557  | 4.88021057312138  | 3.49700715125656  |
| N  | 3.15435028157984  | 0.72574546995241  | 5.24743909224476  |
| N  | 2.99161831019215  | 2.57245755928276  | 7.45207591163173  |
| Sb | 3.92124097872108  | 2.18761022327863  | 3.12485936041987  |
| O  | 3.87870418196358  | 2.40176263608753  | 1.04079404463595  |
| O  | 2.00706927328417  | 1.44421819471800  | 2.70741506844764  |
| C  | 0.75986495307967  | 0.47480677346100  | 0.86462607363382  |
| C  | 2.73159705327216  | 1.48256151290980  | -0.89043289872922 |
| C  | 1.63235741718908  | 0.75997731146653  | -1.39655352995428 |
| C  | 0.65202789849856  | 0.25905291670142  | -0.52407661413316 |
| H  | 3.50498276251139  | 1.88424085318779  | -1.55686631619688 |
| H  | 1.54732696494236  | 0.59080426075571  | -2.47710038125919 |
| H  | -0.20285912164714 | -0.30332554970414 | -0.91944695970216 |
| H  | 0.00223453205047  | 0.09428683182000  | 1.56090518919367  |

**Table S33.** Cartesian coordinates (Å) of **15**.

64

Coordinates from ORCA-job Bicat\_opt

|   |                  |                   |                  |
|---|------------------|-------------------|------------------|
| C | 4.88163763808409 | 0.21454642965397  | 3.06776421960712 |
| C | 6.02505691529855 | 0.02413247146660  | 2.26934939417429 |
| C | 6.60555450675452 | -1.25621174934468 | 2.18690222256688 |
| H | 7.50316082561545 | -1.41154182917816 | 1.57306874686310 |

|    |                  |                   |                  |
|----|------------------|-------------------|------------------|
| C  | 6.04187401632997 | -2.33171765096749 | 2.89405559512798 |
| H  | 6.49947066177286 | -3.32657878121370 | 2.83091336959236 |
| C  | 4.90718839420522 | -2.13332424818944 | 3.69886821309586 |
| H  | 4.48012965806054 | -2.97261487104877 | 4.26438636767002 |
| C  | 4.31993091810012 | -0.85658882283009 | 3.78773902693234 |
| C  | 6.58306382963263 | 1.20425568483423  | 1.49996747307185 |
| H  | 7.63019997204896 | 1.01034429768389  | 1.17793094208107 |
| H  | 5.96780638488466 | 1.36738457416314  | 0.59620195618353 |
| C  | 7.43425587119317 | 2.43869059641936  | 3.43007211819868 |
| H  | 8.48273419046117 | 2.36672387451498  | 3.06218126424901 |
| H  | 7.22884545892684 | 1.54571337405322  | 4.04744877678236 |
| C  | 7.27174399430617 | 3.70488170173263  | 4.26426044347044 |
| H  | 6.25976790493198 | 3.70070079962332  | 4.75080824989346 |
| H  | 8.01763416566715 | 3.70500296180537  | 5.08037184503053 |
| C  | 6.68745382367652 | 3.64805377525148  | 1.46624299598783 |
| H  | 5.91958893987605 | 3.62955735726344  | 0.67360542594529 |
| H  | 7.69678826908409 | 3.63979022906707  | 0.99669737513960 |
| C  | 6.53131147298246 | 4.90345458029126  | 2.31749129405991 |
| H  | 6.73004058024122 | 5.79455065538772  | 1.69483565591308 |
| H  | 5.46995548868923 | 4.98060954869129  | 2.66824192860607 |
| C  | 7.37702126671655 | 6.11837612153046  | 4.23315199782761 |
| H  | 8.13412443098880 | 6.10079081766481  | 5.03713185244332 |
| H  | 6.37367790836324 | 6.26074635584037  | 4.70558644923936 |
| H  | 7.57868518764084 | 6.99355865304010  | 3.59079145558738 |
| C  | 3.08063211432135 | -0.60416413147579 | 4.62204812113466 |
| H  | 2.19866362354356 | -0.57342377657175 | 3.95644319557270 |
| H  | 2.92828889810405 | -1.41774439130818 | 5.36544064245027 |
| C  | 4.16688195478239 | 0.73962844988328  | 6.35040123927737 |
| H  | 5.13970362083006 | 0.45603075212184  | 5.90989650388274 |
| H  | 3.91838065049549 | -0.00549385137510 | 7.13966706970153 |
| C  | 4.25455402802223 | 2.13011983444057  | 6.97025126427870 |
| H  | 4.98634676248941 | 2.11687370065092  | 7.79898529751207 |
| H  | 4.64564963720530 | 2.85276208327355  | 6.20502159799043 |
| C  | 1.83836823217995 | 1.13826469408553  | 5.80730920835920 |
| H  | 1.46921633140001 | 0.41475384559355  | 6.56863750077562 |
| H  | 1.13465821672101 | 1.15919657947847  | 4.95722446149287 |
| C  | 1.94571575092041 | 2.52508134596794  | 6.43206660827384 |
| H  | 2.17485238477036 | 3.27311245521337  | 5.62995725947632 |
| H  | 0.96925403177534 | 2.80750633426112  | 6.86567732851097 |
| C  | 3.02985781806955 | 3.85218502140437  | 8.14152423422149 |
| H  | 3.76285055791485 | 3.81717203184183  | 8.96696791681706 |
| H  | 2.04501211851860 | 4.11239760334814  | 8.56771071892503 |
| H  | 3.33192866743901 | 4.67265435965699  | 7.44455924975720 |
| C  | 2.80504102977400 | 1.74867790846067  | 0.48170529618069 |
| C  | 1.80710676075007 | 1.23688434681060  | 1.37305945502037 |
| N  | 6.49697482183037 | 2.44472792010584  | 2.29455401455477 |
| N  | 7.46434441733587 | 4.89683972858849  | 3.44490071718967 |
| N  | 3.14882001577541 | 0.71152688103069  | 5.28697663518013 |
| N  | 2.95759342270467 | 2.55223494601285  | 7.48886611012643 |
| Bi | 3.92745938950975 | 2.26971753739737  | 3.18834698513484 |
| O  | 3.83439094393342 | 2.47169447744805  | 0.99681678157160 |

|   |                   |                   |                   |
|---|-------------------|-------------------|-------------------|
| O | 1.92445091654278  | 1.49188256600587  | 2.70303766161720  |
| C | 0.73591771658162  | 0.48628961589730  | 0.85531415446633  |
| C | 2.69821532900471  | 1.49224461670303  | -0.89732519685543 |
| C | 1.61623266337600  | 0.74509399217391  | -1.40269687514758 |
| C | 0.63768497971630  | 0.24355443581297  | -0.52878443992475 |
| H | 3.47068369859535  | 1.89515230144683  | -1.56462329425631 |
| H | 1.54396381560320  | 0.55725533733120  | -2.48120975260185 |
| H | -0.20603761419505 | -0.33963198903120 | -0.91830360317912 |
| H | -0.02047726887461 | 0.10570713210845  | 1.55342195917252  |

**Table S34.** Cartesian coordinates (Å) of **CO<sub>2</sub>**.

3

Coordinates from ORCA-job CO2\_opt

|   |                   |                  |                   |
|---|-------------------|------------------|-------------------|
| C | 0.00000077979583  | 0.21999945483071 | 0.07333285931746  |
| O | 0.55189324941734  | 0.08334730797605 | 1.10156747529757  |
| O | -0.55189404921317 | 0.35665324119324 | -0.95490032161503 |

**Table S35.** Cartesian coordinates (Å) of **H<sub>2</sub>O**.

3

Coordinates from ORCA-job H2O

|   |                   |                   |                   |
|---|-------------------|-------------------|-------------------|
| O | -0.00136624200000 | -0.00000000022727 | -0.39289243579087 |
| H | -0.00136624200000 | 0.76683446176300  | 0.20605260348462  |
| H | -0.00136624200000 | -0.76683446153574 | 0.20605260330625  |

**Table S36.** Cartesian coordinates (Å) of **C<sub>2</sub>O<sub>4</sub>H<sub>2</sub>**.

8

Coordinates from ORCA-job opt\_oxa

|   |                  |                  |                   |
|---|------------------|------------------|-------------------|
| C | 3.15762300140725 | 1.59042041058895 | 0.93386059931226  |
| C | 1.90214005630671 | 1.56641207614788 | 1.84021290886703  |
| O | 3.28398310155892 | 2.80808570711072 | 0.35681493161145  |
| O | 1.77498007193959 | 0.34836302642947 | 2.41620821237249  |
| O | 3.90965305471490 | 0.65378306247861 | 0.77125314944711  |
| O | 1.15080178181181 | 2.50347958114862 | 2.00362932065213  |
| H | 4.09093974794739 | 2.76136194979328 | -0.20054297751463 |
| H | 0.96821840931344 | 0.39517351530248 | 2.97384566825216  |

**Table S37.** Cartesian coordinates (Å) of the cation **[1,2-O<sub>2</sub>-C<sub>6</sub>H<sub>3</sub>-3-(CH<sub>2</sub>)<sub>2</sub>NH<sub>3</sub>]<sup>+</sup>**.

23

Coordinates from ORCA-job opt\_dop

|   |                   |                  |                   |
|---|-------------------|------------------|-------------------|
| C | 2.85658863532383  | 1.38871033244400 | 0.46843306125693  |
| C | 1.76668621861132  | 1.31485500735583 | 1.37779283438274  |
| O | 4.11025084398468  | 1.67741474732344 | 0.90768999429692  |
| O | 2.10576269753625  | 1.55453548738247 | 2.68512259783034  |
| C | 0.47868673096672  | 1.02457099835263 | 0.91150416663131  |
| C | 2.62974355439600  | 1.16710303957859 | -0.89605964706991 |
| C | 1.33183840027994  | 0.87606753595130 | -1.36870309795171 |
| C | 0.26012041718428  | 0.80097614895352 | -0.45989459606429 |
| H | 3.48531209401490  | 1.25220355038736 | -1.57819865294416 |
| H | -0.75636469572380 | 0.58794686584157 | -0.81363905604341 |
| H | -0.35998354385302 | 0.97967390994363 | 1.61813381306326  |

|   |                  |                   |                   |
|---|------------------|-------------------|-------------------|
| H | 4.06878180545955 | 1.82057148374916  | 1.87580341524625  |
| H | 1.31843488205592 | 1.52706388282240  | 3.25801772496945  |
| C | 1.11891300866262 | 0.58358529978012  | -2.84290212161012 |
| H | 1.77100015562123 | 1.23349122552474  | -3.45993078155958 |
| H | 0.07039379929232 | 0.79981365624765  | -3.12560675073479 |
| C | 1.44261431008138 | -0.88585055045660 | -3.11077202223032 |
| H | 2.48458512479455 | -1.13182559319379 | -2.84674130999689 |
| H | 0.76972377210291 | -1.56252304499859 | -2.55847288430325 |
| N | 1.28178238564603 | -1.23201992074587 | -4.59822622620692 |
| H | 0.31723175540888 | -1.05084999371287 | -4.91500132983422 |
| H | 1.49793501435669 | -2.22081190444507 | -4.79386107053007 |
| H | 1.90666812079681 | -0.65146451008562 | -5.17804841559755 |

**Table S38.** Cartesian coordinates (Å) of **1,2-(HO)<sub>2</sub>C<sub>2</sub>H<sub>4</sub>**.

10

Coordinates from ORCA-job opt\_etg

|   |                  |                  |                   |
|---|------------------|------------------|-------------------|
| C | 2.90305086766871 | 1.44068954136938 | 0.46587225913170  |
| H | 3.40723395140833 | 0.44882502806124 | 0.47421753474365  |
| H | 2.50457708400376 | 1.60863083788062 | -0.55134796676595 |
| C | 1.76102723488716 | 1.42457997915351 | 1.47270553610183  |
| H | 1.22340459494965 | 2.39460060348128 | 1.43866043461532  |
| H | 1.04433548946723 | 0.61197022672562 | 1.22436624695836  |
| O | 3.83014694127081 | 2.49279361756133 | 0.73311562589092  |
| O | 2.35971135503785 | 1.21415845651453 | 2.76592242100300  |
| H | 4.04770616720050 | 2.41145097964790 | 1.68198264494115  |
| H | 1.71091423410600 | 1.45094536160462 | 3.44949062938004  |

**Table S39.** Cartesian coordinates (Å) of **1,2-(HO)<sub>2</sub>C<sub>2</sub>Me<sub>4</sub>**.

22

Coordinates from ORCA-job opt\_pin

|   |                  |                  |                  |
|---|------------------|------------------|------------------|
| C | 7.33480738890041 | 4.26397645186106 | 4.73003980560142 |
| C | 6.63806005126631 | 5.57513403277088 | 5.25492134356247 |
| C | 8.74605245652545 | 4.55999631304086 | 4.18501725013477 |
| H | 9.34002227225367 | 5.13356045815695 | 4.91694143408594 |
| H | 8.71623196951001 | 5.12816935438820 | 3.23848070680950 |
| H | 9.25661562218464 | 3.60079029653493 | 3.99388517695103 |
| C | 6.50088545886384 | 3.53495287247169 | 3.67180056944951 |
| H | 7.04334496646706 | 2.63088281573144 | 3.34584680328191 |
| H | 6.32767599401864 | 4.16812360183970 | 2.78474365031652 |
| H | 5.52887169693900 | 3.21350295716144 | 4.08016771768636 |
| C | 6.62194922013345 | 6.71061513549773 | 4.22126065434312 |
| H | 6.09852208720899 | 7.59230557869511 | 4.63509277941820 |
| H | 6.09072991290151 | 6.41248859647721 | 3.29996942602378 |
| H | 7.64594261049879 | 7.01851437744225 | 3.95546754725013 |
| C | 5.22035947509566 | 5.29414414758572 | 5.77284963792063 |
| H | 5.22027418662671 | 4.43067178551459 | 6.45860342874146 |
| H | 4.52111663291977 | 5.08696413429518 | 4.94461351052458 |
| H | 4.83130876974464 | 6.18077865165772 | 6.30954099082064 |
| O | 7.48695001472004 | 5.96663263111663 | 6.37826028523353 |
| O | 7.44186397998981 | 3.35084556202594 | 5.84269106456491 |
| H | 7.78847609416190 | 3.89876183246172 | 6.57684387251646 |

H 6.97557311906977 6.58213231827305 6.93190916676316

**Table S40.** Cartesian coordinates (Å) of **1,2-(HO)<sub>2</sub>C<sub>6</sub>H<sub>4</sub>**.  
14

Coordinates from ORCA-job opt\_cat

|   |                   |                   |                   |
|---|-------------------|-------------------|-------------------|
| C | 2.76374595802018  | 1.86739565536600  | 0.48511965535784  |
| C | 1.80691218118750  | 1.32868544406787  | 1.37889797584846  |
| O | 3.73509724381432  | 2.65581143000619  | 1.08114557575674  |
| O | 1.88348622260947  | 1.59880000154968  | 2.72088852880248  |
| C | 0.77900969035931  | 0.51552175806382  | 0.87983617918949  |
| C | 2.68827418544302  | 1.59339680531012  | -0.88619174735686 |
| C | 1.65419199457701  | 0.77651173811541  | -1.38089135122102 |
| C | 0.70358491047812  | 0.24059488224742  | -0.49710976076121 |
| H | 3.43827896987051  | 2.01891887572753  | -1.56728379097655 |
| H | 1.59809477576184  | 0.56404922983927  | -2.45461679288526 |
| H | -0.10384039131856 | -0.39617252823377 | -0.87699600729505 |
| H | 0.04720311039588  | 0.10711629091589  | 1.58622931036401  |
| H | 4.34861052636819  | 2.98274046615034  | 0.40056472398352  |
| H | 2.66199950743322  | 2.17559158987423  | 2.85478001019342  |
